# Supplementary material for: Network-Based Analysis of eQTL Data to Prioritize Driver Mutations
Source: PubMed Central journal article supplement — Genome Biol Evol. 2016 Jan 23;8(3):481–94. doi: 10.1093/gbe/evw010 (PMC4825419; doi:10.1093/gbe/evw010), 2016-01-23
Supplement: supp_evw010_Supplementary_file_1.pdf [file supp_evw010_Supplementary_file_1.pdf]

## # called mutations in strain A of ethanol resistance data set

| #CHROM    | POS     | mapped to gene | REF       | ALT            | type of mutation  |
|-----------|---------|----------------|-----------|----------------|-------------------|
| NC_007779 | 432873  | ribD           | T         | G              | synonymous_SNP    |
| NC_007779 | 3632213 | yigI           | T         | G              | nonsynonymous_SNP |
| NC_007779 | 1881068 | yoag           | GTTTTTTTT | GTTTTTTTTT     | intergenic_INDEL  |
| NC_007779 | 1219107 | ycgG           | A         | G              | nonsynonymous_SNP |
| NC_007779 | 2204029 | yehI           | T         | C              | synonymous_SNP    |
| NC_007779 | 1350607 | rnb            | A         | G              | nonsynonymous_SNP |
| NC_007779 | 1260091 | pth            | GTTTTTTTT | GTTTTTTTTT     | intergenic_INDEL  |
| NC_007779 | 2418020 | yfbU           | T         | C              | synonymous_SNP    |
| NC_007779 | 1848612 | topB           | T         | C              | synonymous_SNP    |
| NC_007779 | 2693128 | purL           | G         | A              | nonsynonymous_SNP |
| NC_007779 | 3045505 | gcvP           | T         | C              | synonymous_SNP    |
| NC_007779 | 3678574 | ilvC           | G         | A              | synonymous_SNP    |
| NC_007779 | 2374075 | arna           | T         | C              | nonsynonymous_SNP |
| NC_007779 | 3519498 | glpK           | A         | G              | nonsynonymous_SNP |
| NC_007779 | 2875230 | iap            | A         | G              | intergenic_SNP    |
| NC_007779 | 1216504 | bluf           | T         | C              | synonymous_SNP    |
| NC_007779 | 2605808 | hyfF           | T         | C              | nonsynonymous_SNP |
| NC_007779 | 2634872 | der            | T         | C              | nonsynonymous_SNP |
| NC_007779 | 1005273 | pyrD           | T         | C              | synonymous_SNP    |
| NC_007779 | 3592358 | yihF           | G         | GGGAAGGTGCGAAT | frameshift_INDEL  |
| NC_007779 | 2429952 | hisP           | A         | G              | nonsynonymous_SNP |
| NC_007779 | 2477843 | yfdN           | A         | G              | nonsynonymous_SNP |
| NC_007779 | 837002  | ybiC           | CGGGGG    | CGGGG          | frameshift_INDEL  |
| NC_007779 | 944418  | dmsB           | A         | G              | nonsynonymous_SNP |
| NC_007779 | 3709331 | asnA           | G         | A              | SNP_stop_gained   |
| NC_007779 | 773431  | cydA           | A         | G              | nonsynonymous_SNP |
| NC_007779 | 474969  | ybaY           | A         | G              | nonsynonymous_SNP |
| NC_007779 | 1743754 | cfa            | T         | C              | nonsynonymous_SNP |
| NC_007779 | 2274950 | rtn            | A         | G              | synonymous_SNP    |
| NC_007779 | 2818531 | alaS           | G         | A              | nonsynonymous_SNP |
| NC_007779 | 3986214 | slp            | AG        | AGGGAAGGTG     | frameshift_INDEL  |
| NC_007779 | 4463791 | pmbA           | A         | G              | nonsynonymous_SNP |
| NC_007779 | 3178798 | ygiB           | T         | C              | synonymous_SNP    |
| NC_007779 | 2723361 | kgtP           | G         | A              | synonymous_SNP    |
| NC_007779 | 2271636 | yeiR           | G         | A              | synonymous_SNP    |
| NC_007779 | 2646727 | yfhM           | T         | C              | nonsynonymous_SNP |
| NC_007779 | 2851804 | hypD           | T         | C              | nonsynonymous_SNP |
| NC_007779 | 19427   | nhaR           | A         | G              | nonsynonymous_SNP |
| NC_007779 | 1623852 | ydeE           | C         | G              | nonsynonymous_SNP |
| NC_007779 | 4442880 | ytfI           | T         | C              | nonsynonymous_SNP |
| NC_007779 | 3682574 | ilvD           | C         | T              | synonymous_SNP    |
| NC_007779 | 1482657 | ynbD           | C         | T              | nonsynonymous_SNP |
| NC_007779 | 152161  | yadL           | A         | G              | nonsynonymous_SNP |
| NC_007779 | 3033104 | lysS           | A         | G              | nonsynonymous_SNP |
| NC_007779 | 2890186 | cysJ           | T         | C              | synonymous_SNP    |
| NC_007779 | 616788  | entF           | T         | C              | nonsynonymous_SNP |
| NC_007779 | 2743082 | rplS           | A         | G              | synonymous_SNP    |
| NC_007779 | 1393120 | ycjY           | T         | C              | nonsynonymous_SNP |

|           |         |      |   |   |                   |
|-----------|---------|------|---|---|-------------------|
| NC_007779 | 2538886 | cysk | T | C | intergenic_SNP    |
| NC_007779 | 3604149 | yigZ | A | G | nonsynonymous_SNP |
| NC_007779 | 3335060 | sfsb | C | T | intergenic_SNP    |
| NC_007779 | 1349144 | rnb  | A | G | nonsynonymous_SNP |
| NC_007779 | 647873  | citF | T | C | nonsynonymous_SNP |
| NC_007779 | 2834637 | hypF | G | A | nonsynonymous_SNP |
| NC_007779 | 4166134 | rpsL | C | T | nonsynonymous_SNP |
| NC_007779 | 1813544 | ydjN | G | A | synonymous_SNP    |
| NC_007779 | 4262675 | dinF | T | C | synonymous_SNP    |
| NC_007779 | 2668960 | hcaE | T | C | nonsynonymous_SNP |
| NC_007779 | 1733814 | lhr  | G | A | nonsynonymous_SNP |
| NC_007779 | 422258  | malZ | A | G | nonsynonymous_SNP |
| NC_007779 | 1126189 | mdtH | C | T | nonsynonymous_SNP |
| NC_007779 | 3442749 | thiE | A | G | synonymous_SNP    |
| NC_007779 | 2123615 | wcaJ | A | G | nonsynonymous_SNP |
| NC_007779 | 2179979 | gatY | G | A | nonsynonymous_SNP |
| NC_007779 | 3337200 | mIaC | T | C | nonsynonymous_SNP |
| NC_007779 | 3712414 | mnmG | G | C | nonsynonymous_SNP |
| NC_007779 | 1977759 | motB | T | C | nonsynonymous_SNP |
| NC_007779 | 1457976 | paaD | C | A | nonsynonymous_SNP |
| NC_007779 | 3455034 | rpoB | T | C | nonsynonymous_SNP |
| NC_007779 | 2999613 | xdhA | A | G | nonsynonymous_SNP |
| NC_007779 | 2768585 | yfjR | T | C | nonsynonymous_SNP |
| NC_007779 | 3226690 | ygjJ | T | C | synonymous_SNP    |
| NC_007779 | 3252124 | yhaJ | G | A | synonymous_SNP    |
| NC_007779 | 4574132 | yjiQ | A | G | nonsynonymous_SNP |
| NC_007779 | 2779100 | ypjA | A | G | synonymous_SNP    |
| NC_007779 | 4443654 | ytfJ | T | C | nonsynonymous_SNP |
| NC_007779 | 4455503 | ytfQ | A | G | nonsynonymous_SNP |
| NC_007779 | 3942761 | bcsE | T | C | synonymous_SNP    |
| NC_007779 | 1628459 | dcp  | A | G | synonymous_SNP    |
| NC_007779 | 1715957 | dtpa | A | G | nonsynonymous_SNP |
| NC_007779 | 2005956 | flid | A | G | intergenic_SNP    |
| NC_007779 | 2513660 | fryb | G | A | nonsynonymous_SNP |
| NC_007779 | 3710290 | mioc | T | C | nonsynonymous_SNP |
| NC_007779 | 1977463 | motB | T | C | synonymous_SNP    |
| NC_007779 | 1284989 | narZ | T | C | synonymous_SNP    |
| NC_007779 | 1826815 | spy  | T | C | intergenic_SNP    |
| NC_007779 | 838200  | ybiJ | C | T | nonsynonymous_SNP |
| NC_007779 | 970634  | ycaQ | C | T | nonsynonymous_SNP |
| NC_007779 | 649967  | citD | A | G | nonsynonymous_SNP |
| NC_007779 | 179350  | dgt  | T | C | synonymous_SNP    |
| NC_007779 | 2484772 | dsdA | T | C | nonsynonymous_SNP |
| NC_007779 | 3222220 | ebgA | T | C | nonsynonymous_SNP |
| NC_007779 | 1687275 | fumC | T | C | nonsynonymous_SNP |
| NC_007779 | 2790905 | gabD | T | C | nonsynonymous_SNP |
| NC_007779 | 2941170 | gcvA | T | C | synonymous_SNP    |
| NC_007779 | 2666599 | hcar | A | G | intergenic_SNP    |
| NC_007779 | 3984411 | hdeB | A | G | nonsynonymous_SNP |
| NC_007779 | 275552  | mmuP | T | C | nonsynonymous_SNP |

|           |         |      |   |   |                   |
|-----------|---------|------|---|---|-------------------|
| NC_007779 | 3316515 | nusA | T | G | synonymous_SNP    |
| NC_007779 | 1464132 | paaK | T | C | synonymous_SNP    |
| NC_007779 | 1365413 | puuC | A | G | synonymous_SNP    |
| NC_007779 | 3168585 | qseB | T | C | synonymous_SNP    |
| NC_007779 | 2320623 | rcsc | A | G | intergenic_SNP    |
| NC_007779 | 1712704 | rsxE | A | G | nonsynonymous_SNP |
| NC_007779 | 1356817 | sapB | A | G | nonsynonymous_SNP |
| NC_007779 | 8698    | talB | A | G | nonsynonymous_SNP |
| NC_007779 | 8972    | talB | A | G | synonymous_SNP    |
| NC_007779 | 245321  | yafK | A | G | nonsynonymous_SNP |
| NC_007779 | 501700  | ybaL | A | G | nonsynonymous_SNP |
| NC_007779 | 1590915 | ydeT | A | G | synonymous_SNP    |
| NC_007779 | 1707042 | ydgK | A | G | nonsynonymous_SNP |
| NC_007779 | 1925886 | yebZ | T | C | synonymous_SNP    |
| NC_007779 | 2047421 | yeeI | A | G | nonsynonymous_SNP |
| NC_007779 | 2747579 | yfjD | A | G | synonymous_SNP    |
| NC_007779 | 3397873 | yhdE | C | T | nonsynonymous_SNP |
| NC_007779 | 2675299 | yphD | G | A | synonymous_SNP    |
| NC_007779 | 3085013 | yqgC | G | A | synonymous_SNP    |
| NC_007779 | 3247046 | yqjA | T | C | synonymous_SNP    |
| NC_007779 | 2535727 | zipA | T | C | nonsynonymous_SNP |
| NC_007779 | 3284089 | agaB | T | C | nonsynonymous_SNP |
| NC_007779 | 3950257 | bcsZ | A | G | nonsynonymous_SNP |
| NC_007779 | 1795962 | btuC | T | C | nonsynonymous_SNP |
| NC_007779 | 663570  | dacA | A | G | synonymous_SNP    |
| NC_007779 | 3071463 | epd  | G | A | synonymous_SNP    |
| NC_007779 | 2565892 | eutH | A | G | nonsynonymous_SNP |
| NC_007779 | 1891010 | fadD | G | A | nonsynonymous_SNP |
| NC_007779 | 3230205 | fadh | T | C | intergenic_SNP    |
| NC_007779 | 4099913 | feoB | A | G | nonsynonymous_SNP |
| NC_007779 | 3498598 | gldA | T | C | nonsynonymous_SNP |
| NC_007779 | 4064228 | gntU | T | C | nonsynonymous_SNP |
| NC_007779 | 912676  | hcp  | T | C | nonsynonymous_SNP |
| NC_007779 | 1026432 | helD | C | T | nonsynonymous_SNP |
| NC_007779 | 2981321 | kduD | T | C | synonymous_SNP    |
| NC_007779 | 4249861 | malE | C | T | nonsynonymous_SNP |
| NC_007779 | 19523   | nhaR | A | G | nonsynonymous_SNP |
| NC_007779 | 1897648 | pabB | A | G | nonsynonymous_SNP |
| NC_007779 | 2621951 | ppk  | G | A | synonymous_SNP    |
| NC_007779 | 1789889 | ppsR | A | G | nonsynonymous_SNP |
| NC_007779 | 2621296 | purN | T | C | nonsynonymous_SNP |
| NC_007779 | 3194166 | rfaE | T | C | nonsynonymous_SNP |
| NC_007779 | 4318372 | rpiB | A | G | synonymous_SNP    |
| NC_007779 | 2236204 | sana | T | C | intergenic_SNP    |
| NC_007779 | 718961  | speF | T | C | nonsynonymous_SNP |
| NC_007779 | 2119805 | wcaK | G | A | nonsynonymous_SNP |
| NC_007779 | 948653  | ycaM | A | G | nonsynonymous_SNP |
| NC_007779 | 1707215 | ydgK | T | C | synonymous_SNP    |
| NC_007779 | 2347609 | yfaL | C | T | nonsynonymous_SNP |
| NC_007779 | 3784364 | yidH | A | G | nonsynonymous_SNP |

|           |         |      |                       |           |                   |
|-----------|---------|------|-----------------------|-----------|-------------------|
| NC_007779 | 267754  | ykfA | T                     | C         | nonsynonymous_SNP |
| NC_007779 | 2234532 | yohK | A                     | G         | synonymous_SNP    |
| NC_007779 | 3715056 | atpB | C                     | T         | nonsynonymous_SNP |
| NC_007779 | 2545887 | cysA | T                     | C         | nonsynonymous_SNP |
| NC_007779 | 2890541 | cysJ | A                     | G         | nonsynonymous_SNP |
| NC_007779 | 160542  | dksA | T                     | C         | synonymous_SNP    |
| NC_007779 | 2065115 | erfK | T                     | C         | nonsynonymous_SNP |
| NC_007779 | 1550225 | fdnG | T                     | C         | nonsynonymous_SNP |
| NC_007779 | 2856122 | mutS | T                     | A         | SNP_stop_gained   |
| NC_007779 | 3317320 | nusA | T                     | C         | nonsynonymous_SNP |
| NC_007779 | 990816  | pncb | A                     | G         | intergenic_SNP    |
| NC_007779 | 3309942 | pnp  | T                     | G         | nonsynonymous_SNP |
| NC_007779 | 3475831 | stha | A                     | G         | intergenic_SNP    |
| NC_007779 | 3969883 | treF | T                     | C         | nonsynonymous_SNP |
| NC_007779 | 2144946 | udk  | T                     | C         | nonsynonymous_SNP |
| NC_007779 | 798640  | ybhA | A                     | G         | nonsynonymous_SNP |
| NC_007779 | 821688  | ybhM | A                     | G         | synonymous_SNP    |
| NC_007779 | 2795799 | ygav | T                     | C         | intergenic_SNP    |
| NC_007779 | 4264473 | yjbM | T                     | C         | synonymous_SNP    |
| NC_007779 | 4331214 | yjdm | T                     | C         | nonsynonymous_SNP |
| NC_007779 | 3824604 | pyre | GCC                   | GC        | intergenic_INDEL  |
| NC_007779 | 2910127 | relA | ACCCAGCACGCGCCCCAGCAC | ACCCAGCAC | inframe_deletion  |
| NC_007779 | 3620604 | ysgA | CTT                   | CT        | frameshift_INDEL  |

# called mutations in strain B of ethanol resistance data set

| #CHROM    | POS     | mapped to gene | REF                   | ALT                                 | type of mutation  |
|-----------|---------|----------------|-----------------------|-------------------------------------|-------------------|
| NC_007779 | 795452  | modA           | A                     | G                                   | intergenic_SNP    |
| NC_007779 | 2660496 | iscR           | A                     | T                                   | nonsynonymous_SNP |
| NC_007779 | 2910127 | relA           | ACCCAGCACGCGCCCCAGCAC | ACCCAGCAC                           | inframe_deletion  |
| NC_007779 | 3685148 | ilvG_2         | A                     | T                                   | intergenic_SNP    |
| NC_007779 | 1881540 | yeaR           | TGGG                  | TAATACCACAACCCCTTAAGTTAGCGCTTATGGGG | inframe_insertion |
| NC_007779 | 2322120 | rscC           | GT                    | GAGCGTTAT                           | intergenic_INDEL  |
| NC_007779 | 3750592 | insH           | G                     | GCAAGTAAATA                         | intergenic_INDEL  |
| NC_007779 | 2176983 | gatA           | G                     | GAT                                 | intergenic_INDEL  |

# called mutations in strain C of ethanol resistance data set

| #CHROM    | POS           | mapped to gene | REF   | ALT                        | type of mutation  |
|-----------|---------------|----------------|-------|----------------------------|-------------------|
| NC_007779 | 2322120       | rcsC           | GT    | GAGCGTTAT                  | intergenic_INDEL  |
| NC_007779 | 2380505       | menC           | CC    | CCATAAGCGCTAACTTAAGGGTTGAC | INDEL_stop_gained |
| NC_007779 | 1302406       | insD           | T     | TTCGCACCTTC                | intergenic_INDEL  |
| NC_007779 | 581786        | ybcY           | G     | GGACTTGTTTCGCACCTTCC       | inframe_insertion |
| NC_007779 | 705229        | nagE           | TCCGC | TCCGCCGC                   | inframe_insertion |
| NC_007779 | 1892079       | yeaY           | T     | A                          | synonymous_SNP    |
| NC_007779 | 2910761       | relA           | A     | G                          | nonsynonymous_SNP |
| NC_007779 | 3448513       | rpoC           | G     | A                          | nonsynonymous_SNP |
| NC_007779 | 4200347       | rpoA           | T     | A                          | nonsynonymous_SNP |
| NC_007779 | 574996-581653 | insH           | .     | .                          | Large deletion    |
| NC_007779 | 574996-581653 | nmpC           | .     | .                          | Large deletion    |
| NC_007779 | 574996-581653 | essD           | .     | .                          | Large deletion    |
| NC_007779 | 574996-581653 | ybcS           | .     | .                          | Large deletion    |
| NC_007779 | 574996-581653 | rzpD           | .     | .                          | Large deletion    |
| NC_007779 | 574996-581653 | borD           | .     | .                          | Large deletion    |
| NC_007779 | 574996-581653 | ybcV           | .     | .                          | Large deletion    |
| NC_007779 | 574996-581653 | ybcW           | .     | .                          | Large deletion    |
| NC_007779 | 574996-581653 | nohB           | .     | .                          | Large deletion    |
| NC_007779 | 574996-581653 | tfaD           | .     | .                          | Large deletion    |
| NC_007779 | 574996-581653 | bycY           | .     | .                          | Large deletion    |
| NC_007779 | 574996-581653 | rzoD           | .     | .                          | Large deletion    |

# called mutations in strain D of ethanol resistance data set

| #CHROM    | POS     | mapped to gene | REF                   | ALT       | type of mutation  |
|-----------|---------|----------------|-----------------------|-----------|-------------------|
| NC_007779 | 1916977 | proQ           | A                     | T         | nonsynonymous_SNP |
| NC_007779 | 2639469 | ispG           | T                     | C         | nonsynonymous_SNP |
| NC_007779 | 2910127 | relA           | ACCCAGCACGCGCCCCAGCAC | ACCCAGCAC | inframe_deletion  |
| NC_007779 | 4198966 | rpsD           | T                     | G         | nonsynonymous_SNP |

# called mutations in strain E of ethanol resistance data set

| #CHROM    | POS     | mapped to gene | REF  | ALT | type of mutation  |
|-----------|---------|----------------|------|-----|-------------------|
| NC_007779 | 2746219 | ffh            | A    | G   | nonsynonymous_SNP |
| NC_007779 | 1335007 | topA           | C    | T   | nonsynonymous_SNP |
| NC_007779 | 4002969 | yhiN           | A    | G   | intergenic_SNP    |
| NC_007779 | 2855834 | mutS           | T    | A   | nonsynonymous_SNP |
| NC_007779 | 3602373 | trkH           | T    | C   | synonymous_SNP    |
| NC_007779 | 2472663 | intS           | A    | G   | nonsynonymous_SNP |
| NC_007779 | 2212091 | yehP           | A    | G   | nonsynonymous_SNP |
| NC_007779 | 1406309 | abgA           | A    | G   | intergenic_SNP    |
| NC_007779 | 1648781 | ydfW           | T    | C   | intergenic_SNP    |
| NC_007779 | 2471949 | intS           | T    | C   | intergenic_SNP    |
| NC_007779 | 916131  | aqpZ           | G    | A   | synonymous_SNP    |
| NC_007779 | 3648106 | hemX           | T    | C   | synonymous_SNP    |
| NC_007779 | 1516725 | ydcV           | A    | G   | nonsynonymous_SNP |
| NC_007779 | 1406269 | abgA           | A    | ACA | frameshift_INDEL  |
| NC_007779 | 2645910 | pbpC           | T    | C   | synonymous_SNP    |
| NC_007779 | 3790458 | uhpB           | G    | A   | INDEL_stop_gained |
| NC_007779 | 2962177 | ppdB           | C    | T   | nonsynonymous_SNP |
| NC_007779 | 2877551 | cas1           | A    | G   | nonsynonymous_SNP |
| NC_007779 | 2512955 | fryC           | G    | A   | nonsynonymous_SNP |
| NC_007779 | 1644370 | ydfT           | TAAA | TAA | frameshift_INDEL  |
| NC_007779 | 1991081 | ftnA           | T    | C   | nonsynonymous_SNP |
| NC_007779 | 449374  | cyoB           | T    | C   | synonymous_SNP    |
| NC_007779 | 4041774 | livJ           | A    | G   | nonsynonymous_SNP |
| NC_007779 | 2763433 | yfjL           | T    | C   | nonsynonymous_SNP |
| NC_007779 | 642258  | ybdR           | T    | C   | synonymous_SNP    |
| NC_007779 | 2813572 | gshA           | T    | C   | synonymous_SNP    |
| NC_007779 | 1932029 | yebF           | T    | C   | nonsynonymous_SNP |
| NC_007779 | 4632259 | nadR           | A    | C   | nonsynonymous_SNP |
| NC_007779 | 2074477 | flu            | A    | G   | nonsynonymous_SNP |
| NC_007779 | 582170  | ftaX           | A    | G   | nonsynonymous_SNP |
| NC_007779 | 3955895 | yhjK           | T    | C   | nonsynonymous_SNP |
| NC_007779 | 1718276 | tyrS           | A    | G   | nonsynonymous_SNP |
| NC_007779 | 1858002 | ydjH           | T    | C   | nonsynonymous_SNP |
| NC_007779 | 1667148 | clcB           | T    | C   | synonymous_SNP    |
| NC_007779 | 4561746 | iraD           | T    | C   | nonsynonymous_SNP |
| NC_007779 | 4069227 | glgX           | A    | G   | synonymous_SNP    |
| NC_007779 | 2128340 | gmm            | T    | C   | nonsynonymous_SNP |
| NC_007779 | 2673614 | yphC           | T    | C   | synonymous_SNP    |
| NC_007779 | 591407  | nfrB           | A    | G   | nonsynonymous_SNP |
| NC_007779 | 1668443 | ynfK           | A    | G   | nonsynonymous_SNP |
| NC_007779 | 1513839 | ydcS           | A    | G   | nonsynonymous_SNP |
| NC_007779 | 2579066 | tktB           | G    | A   | nonsynonymous_SNP |
| NC_007779 | 1824414 | nadE           | A    | G   | synonymous_SNP    |
| NC_007779 | 4095881 | bioH           | A    | G   | nonsynonymous_SNP |
| NC_007779 | 2355566 | glpQ           | G    | A   | nonsynonymous_SNP |
| NC_007779 | 632320  | ybdH           | T    | C   | synonymous_SNP    |
| NC_007779 | 1905809 | manZ           | T    | C   | synonymous_SNP    |
| NC_007779 | 2258308 | rihB           | A    | G   | synonymous_SNP    |



|           |         |      |   |   |                   |
|-----------|---------|------|---|---|-------------------|
| NC_007779 | 53165   | pdxA | G | A | synonymous_SNP    |
| NC_007779 | 1578891 | yddb | A | G | nonsynonymous_SNP |
| NC_007779 | 3372994 | nanA | T | C | synonymous_SNP    |
| NC_007779 | 210994  | ldcC | T | C | nonsynonymous_SNP |
| NC_007779 | 1813070 | ydjN | T | C | synonymous_SNP    |
| NC_007779 | 3206583 | ttdB | G | A | nonsynonymous_SNP |
| NC_007779 | 479721  | tomB | T | C | nonsynonymous_SNP |
| NC_007779 | 4372300 | aspA | A | G | synonymous_SNP    |
| NC_007779 | 1392432 | ymjC | G | A | INDEL_stop_gained |
| NC_007779 | 1859322 | ydjI | A | G | synonymous_SNP    |
| NC_007779 | 2837365 | ascG | T | C | nonsynonymous_SNP |
| NC_007779 | 3450775 | rpoC | T | C | nonsynonymous_SNP |
| NC_007779 | 1350440 | rnb  | C | T | nonsynonymous_SNP |
| NC_007779 | 2813659 | gshA | C | T | synonymous_SNP    |
| NC_007779 | 1629848 | ydfG | A | G | synonymous_SNP    |
| NC_007779 | 1802255 | infC | T | C | nonsynonymous_SNP |
| NC_007779 | 386965  | tauC | A | G | synonymous_SNP    |
| NC_007779 | 4275018 | uvrA | T | C | nonsynonymous_SNP |
| NC_007779 | 2135997 | wzc  | G | A | nonsynonymous_SNP |
| NC_007779 | 1928151 | exoX | G | A | synonymous_SNP    |
| NC_007779 | 1440143 | ydbK | A | G | nonsynonymous_SNP |
| NC_007779 | 2022089 | fliL | T | C | nonsynonymous_SNP |
| NC_007779 | 3708445 | viaA | A | G | synonymous_SNP    |
| NC_007779 | 1158744 | ycfH | A | G | nonsynonymous_SNP |
| NC_007779 | 2660496 | iscR | A | T | nonsynonymous_SNP |
| NC_007779 | 1600253 | isrK | C | T | intergenic_SNP    |
| NC_007779 | 1775399 | ydiN | T | C | nonsynonymous_SNP |
| NC_007779 | 1823202 | chbB | A | C | synonymous_SNP    |
| NC_007779 | 1845615 | ynjI | T | C | nonsynonymous_SNP |
| NC_007779 | 2081558 | yeeX | C | T | nonsynonymous_SNP |
| NC_007779 | 2237845 | preT | G | A | nonsynonymous_SNP |
| NC_007779 | 2328463 | atoD | G | A | nonsynonymous_SNP |
| NC_007779 | 2647907 | yfhM | T | C | nonsynonymous_SNP |
| NC_007779 | 2793721 | gabP | T | C | synonymous_SNP    |
| NC_007779 | 2910944 | relA | A | T | nonsynonymous_SNP |
| NC_007779 | 3013385 | yqeC | A | G | nonsynonymous_SNP |
| NC_007779 | 3606626 | fadB | T | C | nonsynonymous_SNP |
| NC_007779 | 3645220 | cyaA | G | A | synonymous_SNP    |
| NC_007779 | 3745991 | mdtL | T | C | nonsynonymous_SNP |
| NC_007779 | 3820133 | ligB | G | A | nonsynonymous_SNP |
| NC_007779 | 4017560 | rhsB | G | A | nonsynonymous_SNP |
| NC_007779 | 4199333 | rpsD | A | G | nonsynonymous_SNP |
| NC_007779 | 4583511 | mcrB | A | G | synonymous_SNP    |
| NC_007779 | 4603422 | opgB | C | T | nonsynonymous_SNP |
| NC_007779 | 801248  | ybhH | A | G | nonsynonymous_SNP |
| NC_007779 | 926681  | infA | A | T | nonsynonymous_SNP |
| NC_007779 | 1349026 | rnb  | C | T | nonsynonymous_SNP |
| NC_007779 | 1569576 | yddW | T | C | nonsynonymous_SNP |
| NC_007779 | 1757345 | pykF | G | A | intergenic_SNP    |
| NC_007779 | 1951939 | aspS | T | C | nonsynonymous_SNP |

|           |         |      |                       |           |                   |
|-----------|---------|------|-----------------------|-----------|-------------------|
| NC_007779 | 2910127 | relA | ACCCAGCACGCGCCCCAGCAC | ACCCAGCAC | inframe_deletion  |
| NC_007779 | 3336758 | malB | C                     | T         | intergenic_SNP    |
| NC_007779 | 3715545 | atpE | T                     | G         | synonymous_SNP    |
| NC_007779 | 3831076 | waaA | A                     | G         | nonsynonymous_SNP |

# called mutations in strain F of ethanol resistance data set

| #CHROM    | POS     | mapped to gene | REF | ALT           | type of mutation                      |
|-----------|---------|----------------|-----|---------------|---------------------------------------|
| NC_007779 | 3750588 | insH           | TAA | TAAAACAA      | intergenic_INDEL                      |
| NC_007779 | 456415  | clpP           | G   | T             | nonsynonymous_SNP                     |
| NC_007779 | 694644  | miaB           | G   | GCCCATCAGGTTC | INDEL_stop_gained & inframe_insertion |
| NC_007779 | 1885215 | yeaV           | A   | AGG           | frameshift_INDEL                      |
| NC_007779 | 694650  | miaB           | T   | G             | nonsynonymous_SNP                     |
| NC_007779 | 4495938 | idnT           | A   | G             | nonsynonymous_SNP                     |
| NC_007779 | 1909108 | cspC           | AG  | AGGGAAGGTGCG  | frameshift_INDEL                      |
| NC_007779 | 2120992 | wzxC           | A   | T             | nonsynonymous_SNP                     |
| NC_007779 | 2660468 | iscR           | T   | A             | nonsynonymous_SNP                     |
| NC_007779 | 2911891 | relA           | T   | G             | nonsynonymous_SNP                     |
