# Supplementary material for: Network-Based Analysis of eQTL Data to Prioritize Driver Mutations
Source: PubMed Central journal article supplement — Genome Biol Evol. 2016 Jan 23;8(3):481–94. doi: 10.1093/gbe/evw010 (PMC4825419; doi:10.1093/gbe/evw010), 2016-01-23
Supplement: supp_evw010_Supplementary_file_2.pdf [file supp_evw010_Supplementary_file_2.pdf]

#Differential expression values between the L and S ecotype respectively

#Log fold change is reported as Log<sub>2</sub> values

| #Gene systematic name | Gene trivial name | Log fold change | P-value  |
|-----------------------|-------------------|-----------------|----------|
| ecb_04165             | sgcR              | 5.949844408     | 9.09E-16 |
| ecb_04171             | sgcX              | 4.511009483     | 2.24E-15 |
| ecb_04172             | yjhP              | 4.30011807      | 3.41E-15 |
| ecb_04169             | sgcC              | 5.244949112     | 4.30E-15 |
| ecb_04173             | yjhQ              | 3.862372947     | 4.30E-15 |
| ecb_04177             | nanM              | 4.581128709     | 5.30E-15 |
| ecb_04168             | sgcQ              | 4.19743948      | 7.56E-15 |
| ecb_04176             | nanS              | 5.178278249     | 8.39E-15 |
| ecb_04175             | yjhR              | 4.413332554     | 1.19E-14 |
| ecb_03288             | gntK              | -3.180889998    | 6.27E-14 |
| ecb_03269             | malP              | 3.250659708     | 6.46E-14 |
| ecb_01517             | cspl              | -8.310944974    | 1.28E-13 |
| ecb_03222             | frlB              | 3.705210398     | 8.06E-13 |
| ecb_01518             | ydfP              | -3.712051494    | 2.87E-12 |
| ecb_04166             | sgcE              | 4.658503921     | 2.92E-12 |
| ecb_03223             | frlC              | 2.827558362     | 7.28E-12 |
| ecb_03268             | malQ              | 2.626606579     | 3.26E-11 |
| ecb_03224             | frlD              | 2.507682261     | 3.26E-11 |
| ecb_01822             | edd               | -2.461674402    | 1.56E-10 |
| ecb_01605             | gstA              | -1.108750663    | 7.19E-10 |
| ecb_01949             | wcaM              | -2.729354114    | 9.65E-10 |
| ecb_01953             | wcaJ              | -1.935457296    | 2.29E-09 |
| ecb_02187             | menE              | 1.370658809     | 3.54E-09 |
| ecb_01821             | eda               | -1.286981716    | 4.53E-09 |
| ecb_01950             | wcaL              | -1.948167971    | 5.45E-09 |
| ecb_02188             | menC              | 1.63559199      | 6.44E-09 |
| ecb_01948             | galF              | -2.14057753     | 8.68E-09 |
| ecb_03941             | acs               | -2.242247269    | 2.82E-08 |
| ecb_04007             | cutA              | 0.909011989     | 3.08E-08 |
| ecb_01139             | ycgZ              | -1.826803208    | 4.27E-08 |
| ecb_01952             | wzxC              | -2.669670362    | 4.27E-08 |
| ecb_01951             | wcaK              | -2.063822383    | 6.30E-08 |
| ecb_02215             | alaA              | 1.076385207     | 4.40E-07 |
| ecb_04005             | yjdC              | 0.767346906     | 4.79E-07 |
| ecb_01140             | ymgA              | -1.535332633    | 7.12E-07 |
| ecb_03940             | yjcH              | -2.056601338    | 1.20E-06 |
| ecb_03906             | malE              | 2.744281028     | 2.09E-06 |
| ecb_01988             | yegZ              | -1.131795386    | 2.84E-06 |
| ecb_03908             | lamB              | 2.801341282     | 3.78E-06 |
| ecb_00146             | ligT              | 0.746206726     | 4.24E-06 |
| ecb_04191             | uxuA              | 1.234509882     | 7.68E-06 |
| ecb_00416             | mscK              | -0.763748232    | 8.94E-06 |
| ecb_01580             | fumC              | -0.819223753    | 1.46E-05 |
| ecb_04006             | dipZ              | 0.930641875     | 1.62E-05 |
| ecb_01954             | cpsG              | -1.036974114    | 2.40E-05 |
| ecb_01074             | flgG              | -0.798513328    | 2.49E-05 |
| ecb_01349             | ydbK              | -0.710703495    | 2.64E-05 |

|           |      |              |             |
|-----------|------|--------------|-------------|
| ecb_00391 | lon  | 0.769860706  | 2.67E-05    |
| ecb_03909 | malM | 2.364916231  | 2.93E-05    |
| ecb_01987 | ogrK | -0.840307305 | 2.93E-05    |
| ecb_01077 | flgJ | -0.87361949  | 2.93E-05    |
| ecb_01072 | flgE | -0.815759894 | 3.28E-05    |
| ecb_00681 | sdhC | -0.839258673 | 3.50E-05    |
| ecb_00539 | nfsB | 0.61727496   | 3.50E-05    |
| ecb_01947 | rfbB | -0.912753543 | 4.23E-05    |
| ecb_02958 | sstT | 0.635042788  | 4.58E-05    |
| ecb_03706 | yigM | 0.621452569  | 4.84E-05    |
| ecb_02975 | yhaK | 0.533482206  | 5.24E-05    |
| ecb_00971 | rlmI | 0.714717866  | 5.89E-05    |
| ecb_00970 | hspQ | 0.507222201  | 6.11E-05    |
| ecb_01141 | ariR | -1.372902462 | 6.76E-05    |
| ecb_01078 | flgK | -0.787046368 | 7.14E-05    |
| ecb_00683 | sdhA | -0.802191398 | 8.93E-05    |
| ecb_02909 | ygiB | 0.50892744   | 0.000108549 |
| ecb_04219 | yjiX | 0.823432051  | 0.000112563 |
| ecb_02910 | ygiC | 0.580705863  | 0.000112881 |
| ecb_03939 | actP | -1.944431137 | 0.000152502 |
| ecb_01071 | flgD | -0.807063101 | 0.000156742 |
| ecb_01075 | flgH | -0.893167158 | 0.000157252 |
| ecb_00351 | malZ | 0.665924332  | 0.000160493 |
| ecb_00682 | sdhD | -0.800217729 | 0.000229589 |
| ecb_01746 | yeaC | -0.52755435  | 0.000274784 |
| ecb_01850 | flhA | -0.602203541 | 0.00027543  |
| ecb_01354 | ynbE | 0.55308585   | 0.000364237 |
| ecb_04190 | gntP | 1.014012432  | 0.000431815 |
| ecb_01070 | flgC | -0.75666507  | 0.000431815 |
| ecb_03733 | rfaH | 0.603360886  | 0.000431815 |
| ecb_00802 | rimO | 0.504151054  | 0.000464861 |
| ecb_00684 | sdhB | -0.794124746 | 0.000501736 |
| ecb_00145 | sfsA | 0.50080934   | 0.000505998 |
| ecb_01253 | acnA | -0.429168705 | 0.000516028 |
| ecb_01280 | pspF | 0.505202108  | 0.000565064 |
| ecb_01069 | flgB | -0.709108758 | 0.000594886 |
| ecb_02111 | yejG | -0.862071828 | 0.000602684 |
| ecb_00680 | gltA | -0.864509364 | 0.000629888 |
| ecb_01065 | murJ | 0.58349283   | 0.000657352 |
| ecb_01849 | flhE | -0.657779721 | 0.000663596 |
| ecb_01872 | yecR | -0.613795573 | 0.000663596 |
| ecb_01851 | flhB | -0.631898471 | 0.000668834 |
| ecb_03737 | fadB | -0.690591772 | 0.000706981 |
| ecb_01254 | ribA | 0.490179842  | 0.000750263 |
| ecb_04192 | uxuB | 0.964119556  | 0.000764019 |
| ecb_00909 | ycaO | 0.450138163  | 0.000872658 |
| ecb_01068 | flgA | -0.508319446 | 0.000913333 |
| ecb_01625 | mepH | 0.424410149  | 0.000921384 |
| ecb_03749 | polA | 0.417531014  | 0.000939885 |
| ecb_03267 | gntT | -1.001565436 | 0.001285077 |

|           |      |              |             |
|-----------|------|--------------|-------------|
| ecb_01142 | ymgC | -1.342906656 | 0.001328061 |
| ecb_02216 | yfbR | 0.462914116  | 0.001417219 |
| ecb_00768 | ybiC | -0.524310896 | 0.001552568 |
| ecb_01692 | pfkB | 0.600369161  | 0.001711886 |
| ecb_01022 | phoH | -0.651324259 | 0.001767819 |
| ecb_00337 | aroM | 0.494409624  | 0.001801012 |
| ecb_01498 | ydfG | -0.443458064 | 0.001976617 |
| ecb_00403 | amtB | -0.573372394 | 0.0021099   |
| ecb_04031 | rsgA | 0.339107436  | 0.002134546 |
| ecb_01076 | flgI | -0.938574027 | 0.002240161 |
| ecb_03225 | friR | 0.546994329  | 0.002243894 |
| ecb_01747 | msrB | -0.526834837 | 0.002477026 |
| ecb_01355 | ydbL | 0.467636859  | 0.002581003 |
| ecb_04218 | yjiA | 0.788458906  | 0.002581003 |
| ecb_03423 | malS | 0.884200392  | 0.002688691 |
| ecb_00688 | sucD | -0.481316397 | 0.002912526 |
| ecb_01073 | flgF | -0.95299189  | 0.002919209 |
| ecb_01713 | astE | -0.512200661 | 0.002976781 |
| ecb_01180 | yehH | -0.622672134 | 0.003168996 |
| ecb_00059 | djlA | 0.370084361  | 0.003344253 |
| ecb_00692 | cydA | 0.561916329  | 0.003396347 |
| ecb_04258 | deoA | 0.362648557  | 0.003852538 |
| ecb_00685 | sucA | -0.393343237 | 0.003945501 |
| ecb_00130 | panD | 0.364655339  | 0.004048896 |
| ecb_00335 | aroL | 0.402433324  | 0.004221914 |
| ecb_03133 | tsaC | 0.415540535  | 0.004386102 |
| ecb_01717 | astC | -0.708168194 | 0.004671136 |
| ecb_01137 | bluR | -0.620860871 | 0.004909377 |
| ecb_03134 | yrdD | 0.341515304  | 0.005283995 |
| ecb_02490 | aroF | 0.626969045  | 0.005780075 |
| ecb_00365 | thiL | 0.484335784  | 0.006029947 |
| ecb_00555 | fepC | -0.498057527 | 0.006541011 |
| ecb_01916 | yeeE | 0.85742358   | 0.00695773  |
| ecb_00950 | zapC | -0.402108087 | 0.007042928 |
| ecb_01136 | ycgX | -0.644855107 | 0.007731163 |
| ecb_01208 | purU | 0.39589598   | 0.008148054 |
| ecb_00385 | yajG | 0.32135574   | 0.008766193 |
| ecb_02753 | yggE | 0.340443659  | 0.009277946 |
| ecb_02591 | rpoS | -0.394299865 | 0.009619248 |
| ecb_02130 | napB | 0.34282403   | 0.009619248 |
| ecb_01032 | yedY | 0.38729318   | 0.010285648 |
| ecb_01066 | flgN | -0.349747808 | 0.010411083 |
| ecb_00217 | lpcA | 0.436410133  | 0.010494325 |
| ecb_01673 | aroH | 0.378634788  | 0.010908319 |
| ecb_03926 | tyrB | 0.353681847  | 0.011203719 |
| ecb_00336 | yaiA | 0.453635717  | 0.01139345  |
| ecb_00159 | dgt  | 0.419228177  | 0.011608789 |
| ecb_02129 | napC | 0.317941243  | 0.011898035 |
| ecb_01445 | ddpA | -0.541988444 | 0.012375918 |
| ecb_00195 | rceF | 0.334835193  | 0.013166114 |

|           |      |              |             |
|-----------|------|--------------|-------------|
| ecb_01714 | astB | -0.503496107 | 0.013166114 |
| ecb_03219 | cysG | 0.334999611  | 0.013365861 |
| ecb_01123 | potB | 0.291535397  | 0.014030298 |
| ecb_02044 | metG | 0.498895933  | 0.014112478 |
| ecb_02905 | yqiB | 0.344619657  | 0.01451076  |
| ecb_02737 | gcvT | 0.456232586  | 0.014638464 |
| ecb_01079 | flgL | -0.614449054 | 0.014943996 |
| ecb_00029 | ribF | 0.432374945  | 0.014943996 |
| ecb_02163 | inaA | -0.589045326 | 0.014943996 |
| ecb_02840 | yghG | -0.295476925 | 0.015931705 |
| ecb_02489 | tyrA | 0.452937641  | 0.016169119 |
| ecb_00951 | ycbX | 0.307781196  | 0.016510876 |
| ecb_03132 | aroE | 0.323639199  | 0.017119956 |
| ecb_00010 | satP | 0.362206057  | 0.01858096  |
| ecb_02772 | metK | 0.713475844  | 0.019885682 |
| ecb_01217 | oppA | 0.319015019  | 0.020651817 |
| ecb_01930 | ugd  | -0.41692898  | 0.020651817 |
| ecb_04244 | fhuF | -0.474622486 | 0.020862145 |
| ecb_01367 | azoR | 0.338805349  | 0.02192233  |
| ecb_00008 | talB | 0.255966953  | 0.022778114 |
| ecb_02132 | napG | 0.347071399  | 0.023289641 |
| ecb_01732 | topB | 0.335666967  | 0.026036416 |
| ecb_01805 | yebT | 0.366522781  | 0.026036416 |
| ecb_02582 | ygbA | 0.346092508  | 0.026036416 |
| ecb_02777 | gshB | 0.272649968  | 0.026036416 |
| ecb_02928 | folB | 0.289326618  | 0.026491839 |
| ecb_03310 | rpoH | -0.44010201  | 0.026939462 |
| ecb_01218 | oppB | 0.326835287  | 0.027805705 |
| ecb_01513 | ybcW | -0.455228992 | 0.027939067 |
| ecb_01915 | yeeD | 0.745874778  | 0.027939067 |
| ecb_02289 | alaC | -0.393750647 | 0.027972279 |
| ecb_01733 | selD | 0.265498221  | 0.027972279 |
| ecb_01320 | dbpA | 0.509776051  | 0.028057284 |
| ecb_04257 | deoC | 0.308976734  | 0.028319609 |
| ecb_04030 | psd  | 0.27540383   | 0.028556691 |
| ecb_03041 | glmM | 0.255251547  | 0.02969348  |
| ecb_01353 | ydbH | 0.428741604  | 0.030534907 |
| ecb_02362 | yffB | 0.438209323  | 0.030534907 |
| ecb_01067 | flgM | -0.297221408 | 0.030762664 |
| ecb_02070 | yohJ | 0.417128565  | 0.031640062 |
| ecb_04193 | uxuR | 0.3744831    | 0.031640062 |
| ecb_01134 | icd  | -0.267128031 | 0.032019084 |
| ecb_02942 | patA | -0.348300848 | 0.033454025 |
| ecb_03131 | yrdB | 0.335208152  | 0.033858325 |
| ecb_00687 | sucC | -0.296693064 | 0.034020404 |
| ecb_01795 | yebO | -0.519012607 | 0.035626501 |
| ecb_00428 | gsk  | 0.29041831   | 0.036864752 |
| ecb_02131 | napH | 0.317674417  | 0.037218765 |
| ecb_01031 | ycdX | 0.381525315  | 0.037264587 |
| ecb_02684 | aas  | 0.331110751  | 0.038033495 |

|           |      |              |             |
|-----------|------|--------------|-------------|
| ecb_03396 | eptB | -0.414902686 | 0.038497296 |
| ecb_00935 | pncB | 0.318472801  | 0.038835053 |
| ecb_02228 | folX | 0.307444262  | 0.038835053 |
| ecb_02965 | mzrA | 0.316752539  | 0.038835053 |
| ecb_01572 | pntA | 0.320199546  | 0.040424742 |
| ecb_00339 | ykiA | 0.244876282  | 0.040424742 |
| ecb_03277 | glpD | 0.471073262  | 0.041402534 |
| ecb_04110 | mgtA | -0.608931073 | 0.041949466 |
| ecb_00693 | cydB | 0.377726836  | 0.042034919 |
| ecb_01265 | fabI | 0.260468077  | 0.044217919 |
| ecb_01576 | ydgC | -0.470828477 | 0.04496809  |
| ecb_00220 | yafQ | -0.282012057 | 0.045096953 |
| ecb_01730 | gdhA | 0.309990327  | 0.045336014 |
| ecb_03027 | yhbW | -0.256188936 | 0.047094033 |
| ecb_01931 | gnd  | 0.306014508  | 0.047094033 |
| ecb_00633 | nagC | 0.352776349  | 0.049378244 |
| ecb_01924 | hisB | 0.380237619  | 0.049600492 |
| ecb_00218 | yafJ | 0.292823088  | 0.049600492 |
| ecb_02906 | nudF | 0.308510779  | 0.050407326 |
| ecb_03258 | greB | 0.323055261  | 0.050407326 |
| ecb_01884 | yedW | -0.386254145 | 0.050682349 |
| ecb_00406 | atl  | 0.347369322  | 0.051827459 |
| ecb_01796 | mgrB | -0.528633873 | 0.051827459 |
| ecb_01057 | dinI | -0.394586377 | 0.053774848 |
| ecb_02723 | prfB | 0.267892469  | 0.054445137 |
| ecb_02248 | fabB | 0.355592565  | 0.055044722 |
| ecb_00033 | ispH | 0.332235718  | 0.056313277 |
| ecb_00204 | mltD | -0.363387026 | 0.057180453 |
| ecb_00686 | sucB | -0.253186756 | 0.057584988 |
| ecb_00032 | fkpB | 0.410859631  | 0.058123698 |
| ecb_03422 | bax  | -0.321332498 | 0.061759688 |
| ecb_00433 | ybaP | -0.328321394 | 0.061831739 |
| ecb_03470 | gpmM | 0.325589846  | 0.061831739 |
| ecb_03897 | pgi  | 0.35987952   | 0.062657516 |
| ecb_04058 | ulaR | 0.262292682  | 0.064734423 |
| ecb_04113 | pyrB | 0.268265953  | 0.064734423 |
| ecb_03797 | cpxA | 0.314817531  | 0.066763001 |
| ecb_03348 | rlmJ | 0.292526176  | 0.066763001 |
| ecb_01716 | astA | -0.623730035 | 0.066798197 |
| ecb_00221 | dinJ | -0.242646007 | 0.067172797 |
| ecb_00972 | yccX | 0.31175157   | 0.067470768 |
| ecb_03255 | pck  | -0.477128609 | 0.069247132 |
| ecb_00388 | clpP | 0.220508884  | 0.069247132 |
| ecb_00402 | glnK | -0.492907126 | 0.069247132 |
| ecb_03828 | katG | 0.335497543  | 0.069736791 |
| ecb_02226 | yfcF | -0.247697642 | 0.070046325 |
| ecb_03290 | yhhW | 0.268814896  | 0.07147466  |
| ecb_03798 | cpxR | 0.248271479  | 0.07211459  |
| ecb_00194 | yaeB | 0.329476823  | 0.07260198  |
| ecb_02279 | evgA | -0.357095132 | 0.073701631 |

|           |      |              |             |
|-----------|------|--------------|-------------|
| ecb_02841 | pppA | -0.329849838 | 0.073701631 |
| ecb_03656 | rep  | 0.431105102  | 0.074676381 |
| ecb_01446 | ddpX | -0.606205905 | 0.075341937 |
| ecb_01210 | rssA | -0.220821311 | 0.076193655 |
| ecb_01387 | tehB | 0.287174825  | 0.076347105 |
| ecb_03284 | glgB | 0.259937188  | 0.076952549 |
| ecb_04004 | cadC | 0.346119279  | 0.076952549 |
| ecb_01163 | ycgB | -0.237767066 | 0.078336212 |
| ecb_03474 | tdh  | 0.267684254  | 0.078336212 |
| ecb_03404 | viaF | 0.327457458  | 0.079812809 |
| ecb_00057 | surA | 0.237837288  | 0.082068927 |
| ecb_00574 | ahpC | -0.235752627 | 0.082068927 |
| ecb_02518 | gabT | -0.294970628 | 0.08298252  |
| ecb_02736 | gcvH | 0.407858468  | 0.085369271 |
| ecb_02224 | yfcD | -0.221902461 | 0.085502132 |
| ecb_03344 | uspA | -0.320880231 | 0.08568578  |
| ecb_03770 | yihX | 0.278781814  | 0.085961729 |
| ecb_02016 | gatR | 0.273766939  | 0.086046203 |
| ecb_01922 | hisD | 0.343587925  | 0.087060209 |
| ecb_04260 | deoD | 0.243266043  | 0.089926364 |
| ecb_01379 | ydcl | -0.287960889 | 0.090192758 |
| ecb_01927 | hisF | 0.27755925   | 0.090218144 |
| ecb_02071 | yohK | 0.316667686  | 0.090386437 |
| ecb_03098 | yhcN | 0.437218699  | 0.090386437 |
| ecb_02904 | cpdA | 0.244310896  | 0.090958724 |
| ecb_01715 | astD | -0.595302263 | 0.090958724 |
| ecb_00745 | bioD | 0.386184655  | 0.091476937 |
| ecb_01258 | pyrF | 0.27093554   | 0.091476937 |
| ecb_02229 | yfcH | 0.307402106  | 0.09210024  |
| ecb_02280 | evgS | -0.376605107 | 0.09210024  |
| ecb_02964 | yqjA | 0.295432092  | 0.09356023  |
| ecb_00253 | ecpR | -0.439912236 | 0.094658591 |
| ecb_00014 | dnaK | 0.321547727  | 0.095094596 |
| ecb_02842 | yghJ | -0.405961492 | 0.095595492 |
| ecb_03364 | gadX | -0.326282209 | 0.096404917 |
| ecb_00496 | ybcM | 0.362954335  | 0.097291015 |
| ecb_04270 | yjjX | -0.259115269 | 0.098883168 |
| ecb_02429 | hcaR | -0.566133342 | 0.09993682  |
| ecb_00058 | lptD | 0.304864749  | 0.100258655 |
| ecb_00957 | rmf  | -0.309925632 | 0.100495975 |
| ecb_01587 | uidR | 0.31340111   | 0.102456005 |
| ecb_00363 | ribE | 0.233071839  | 0.102886176 |
| ecb_01631 | ydhC | 0.331696855  | 0.103893771 |
| ecb_03015 | yraN | -0.23890718  | 0.104375319 |
| ecb_00808 | ybjG | -0.263727055 | 0.106873226 |
| ecb_03214 | ppiA | 0.247715955  | 0.108437511 |
| ecb_01033 | ycdZ | 0.303191109  | 0.10995768  |
| ecb_02160 | nrdA | -0.248897231 | 0.10995768  |
| ecb_03599 | yieH | 0.275955015  | 0.110509519 |
| ecb_04034 | yjeF | 0.25085828   | 0.111656113 |

|           |      |              |             |
|-----------|------|--------------|-------------|
| ecb_01837 | aspS | 0.229989941  | 0.1124577   |
| ecb_01209 | yehJ | 0.413371888  | 0.113652896 |
| ecb_00860 | potG | 0.251061992  | 0.113652896 |
| ecb_01020 | efeO | -0.317298188 | 0.113745319 |
| ecb_01984 | baeR | 0.24508315   | 0.114756952 |
| ecb_04129 | yjgR | 0.206596871  | 0.115136915 |
| ecb_02775 | endA | 0.291282082  | 0.115172152 |
| ecb_00743 | bioF | 0.494296308  | 0.115525878 |
| ecb_00219 | yafK | -0.245399371 | 0.11644822  |
| ecb_03544 | nlpA | 0.353463991  | 0.117957249 |
| ecb_03813 | zapB | 0.212364623  | 0.118756745 |
| ecb_02133 | napA | 0.350269789  | 0.125024737 |
| ecb_00859 | potF | 0.304662702  | 0.129256831 |
| ecb_02907 | tolC | 0.195153279  | 0.13367455  |
| ecb_02747 | argP | 0.270288814  | 0.13367455  |
| ecb_01762 | yoaF | 0.255562756  | 0.13367455  |
| ecb_01122 | potC | 0.293524448  | 0.133839016 |
| ecb_01121 | potD | 0.242358499  | 0.135148363 |
| ecb_02290 | ypdA | 0.217721161  | 0.13859174  |
| ecb_03424 | avtA | 0.197933515  | 0.139821584 |
| ecb_02141 | apbE | 0.325255013  | 0.141550088 |
| ecb_01305 | ycjY | 0.344455622  | 0.143678495 |
| ecb_02480 | yfiM | -0.385654004 | 0.14623274  |
| ecb_01453 | yddB | -0.252392727 | 0.14623274  |
| ecb_02793 | mltC | 0.247438976  | 0.147973984 |
| ecb_02924 | ygiF | 0.228665063  | 0.148548769 |
| ecb_00925 | smtA | 0.24818316   | 0.148747512 |
| ecb_02542 | luxS | 0.201913251  | 0.14913256  |
| ecb_03758 | yihM | 0.295352099  | 0.151133644 |
| ecb_03708 | metE | 0.214416368  | 0.151320239 |
| ecb_03501 | yicC | 0.270673396  | 0.152761641 |
| ecb_04020 | sugE | -0.276659523 | 0.154319207 |
| ecb_04083 | ytfG | 0.341538292  | 0.155042591 |
| ecb_01784 | sdaA | 0.259192186  | 0.155042591 |
| ecb_01818 | yebF | -0.328340617 | 0.155042591 |
| ecb_03631 | kup  | -0.426237392 | 0.155042591 |
| ecb_02123 | ccmF | 0.208872663  | 0.156650764 |
| ecb_04036 | amiB | 0.274064321  | 0.156943171 |
| ecb_03236 | trpS | 0.228033019  | 0.156943171 |
| ecb_00085 | ftsI | -0.267378819 | 0.157399606 |
| ecb_01058 | pyrC | -0.281681961 | 0.157399606 |
| ecb_00567 | ybdH | 0.353500611  | 0.158725817 |
| ecb_03075 | arcB | 0.246768481  | 0.158725817 |
| ecb_01871 | yecJ | 0.25461877   | 0.159738379 |
| ecb_01923 | hisC | 0.370853785  | 0.161182783 |
| ecb_01870 | ftnB | -0.384615908 | 0.161182783 |
| ecb_01346 | ynaE | -0.498796268 | 0.161884993 |
| ecb_00560 | entC | -0.307472078 | 0.162424901 |
| ecb_02103 | yeiR | 0.278477469  | 0.162571346 |
| ecb_00936 | pepN | 0.197538041  | 0.162571346 |

|           |      |              |             |
|-----------|------|--------------|-------------|
| ecb_01649 | sufS | -0.291220023 | 0.162571346 |
| ecb_01452 | pqqL | -0.277448895 | 0.162571346 |
| ecb_00407 | ybaA | -0.487421265 | 0.162571346 |
| ecb_03885 | metA | 0.49415418   | 0.162571346 |
| ecb_02730 | ygfZ | 0.246346496  | 0.164324114 |
| ecb_02134 | napD | 0.253876099  | 0.164324114 |
| ecb_02192 | menF | 0.220130062  | 0.164832971 |
| ecb_03699 | yigl | -0.385568826 | 0.165583952 |
| ecb_01256 | lapA | -0.306973662 | 0.166082433 |
| ecb_04254 | yjiV | 0.224182679  | 0.166989295 |
| ecb_02686 | lysA | 0.426687444  | 0.167080126 |
| ecb_01679 | btuE | -0.271877643 | 0.170113547 |
| ecb_00121 | yacC | 0.333304204  | 0.174777924 |
| ecb_02467 | rpoE | -0.26182987  | 0.174777924 |
| ecb_01929 | wzzB | 0.2963337    | 0.175446338 |
| ecb_02921 | yqiK | 0.365260414  | 0.175446338 |
| ecb_02098 | fruB | -0.272039297 | 0.177826731 |
| ecb_01925 | hisH | 0.291118539  | 0.179612273 |
| ecb_00886 | clpS | -0.224308284 | 0.180304617 |
| ecb_01578 | rstB | -0.210895865 | 0.181038941 |
| ecb_04089 | ytfL | -0.267209723 | 0.181038941 |
| ecb_01444 | ddpB | -0.432754852 | 0.181038941 |
| ecb_02768 | speA | 0.183544429  | 0.185939594 |
| ecb_01568 | mdtI | -0.453910115 | 0.185939594 |
| ecb_00140 | yadN | 0.312575834  | 0.186277106 |
| ecb_00030 | ileS | 0.389456599  | 0.18899429  |
| ecb_03847 | sthA | -0.205588415 | 0.189320409 |
| ecb_01609 | mliC | -0.225423226 | 0.189825723 |
| ecb_02240 | folC | 0.248277886  | 0.189984383 |
| ecb_01624 | grxD | 0.247096775  | 0.189984383 |
| ecb_01662 | aroD | 0.317160794  | 0.190595839 |
| ecb_01674 | ydiE | -0.313117895 | 0.193101626 |
| ecb_02235 | argT | -0.260813483 | 0.193101626 |
| ecb_02966 | yqjC | 0.200829782  | 0.196006099 |
| ecb_03936 | ghxP | 0.253384238  | 0.196512034 |
| ecb_01259 | yciH | 0.254750386  | 0.196929277 |
| ecb_03771 | yihY | 0.215227568  | 0.198611719 |
| ecb_01575 | folM | 0.248592154  | 0.198795453 |
| ecb_02069 | dusC | 0.225327856  | 0.198795453 |
| ecb_01680 | btuC | -0.244531629 | 0.199754587 |
| ecb_03320 | yhhQ | -0.278789337 | 0.199754587 |
| ecb_03183 | gspK | 0.242829287  | 0.199754587 |
| ecb_01676 | ydiV | -0.261681716 | 0.199754587 |
| ecb_01804 | yebS | 0.257966245  | 0.202155149 |
| ecb_04090 | msrA | 0.253724736  | 0.202155149 |
| ecb_00364 | nusB | 0.331842011  | 0.202583988 |
| ecb_01926 | hisA | 0.273353005  | 0.202618813 |
| ecb_02535 | proX | -0.319049901 | 0.20418483  |
| ecb_00439 | ybbJ | -0.256116785 | 0.20418483  |
| ecb_02247 | yfcJ | -0.284506651 | 0.20418483  |



|           |      |              |             |
|-----------|------|--------------|-------------|
| ecb_02137 | mqo  | -0.226118677 | 0.20418483  |
| ecb_01021 | efeB | -0.415773995 | 0.20418483  |
| ecb_02601 | cysN | 0.267801675  | 0.207618722 |
| ecb_00479 | folD | -0.191433316 | 0.209351086 |
| ecb_03744 | yihD | -0.229611419 | 0.209351086 |
| ecb_02724 | recJ | 0.208686463  | 0.210585805 |
| ecb_00785 | ybiR | 0.197912414  | 0.211310807 |
| ecb_02588 | ygbL | 0.220648539  | 0.212709061 |
| ecb_03283 | glgX | 0.296896931  | 0.214265763 |
| ecb_01082 | rluC | 0.251715319  | 0.216865459 |
| ecb_00807 | deoR | -0.260415951 | 0.22024116  |
| ecb_01566 | asr  | 0.245462472  | 0.221831073 |
| ecb_00742 | bioB | 0.561778956  | 0.222198265 |
| ecb_04035 | tsaE | 0.222050533  | 0.224473567 |
| ecb_02122 | ccmG | 0.210088656  | 0.224516096 |
| ecb_01493 | ydeE | 0.284418437  | 0.224628448 |
| ecb_00478 | ybcJ | -0.295573629 | 0.227075182 |
| ecb_03768 | yihV | 0.209510436  | 0.227410852 |
| ecb_03019 | yraR | 0.175373319  | 0.229279781 |
| ecb_01014 | rutB | -0.299818712 | 0.231310035 |
| ecb_00996 | torS | 0.223454301  | 0.233070188 |
| ecb_00300 | mhpR | -0.382541216 | 0.233070188 |
| ecb_03411 | glyQ | 0.193378739  | 0.233587408 |
| ecb_00707 | aroG | -0.177017843 | 0.233661594 |
| ecb_03096 | mdh  | -0.337982065 | 0.235762615 |
| ecb_01945 | rfbA | -0.313686607 | 0.235762615 |
| ecb_03979 | yjdM | 0.275927835  | 0.235762615 |
| ecb_03107 | yhdE | -0.189687281 | 0.236252197 |
| ecb_03282 | glgC | 0.258971266  | 0.237411417 |
| ecb_00299 | lacl | 0.19538988   | 0.237411417 |
| ecb_01569 | mdtJ | -0.483348656 | 0.237411417 |
| ecb_02880 | exbB | 0.320215532  | 0.237455298 |
| ecb_03048 | obgE | -0.25311495  | 0.237862229 |
| ecb_01537 | ydfX | 0.225298431  | 0.238810206 |
| ecb_01928 | hisI | 0.245614618  | 0.239467012 |
| ecb_03248 | mrcA | 0.359740785  | 0.240107902 |
| ecb_03638 | rbsK | -0.209846241 | 0.240107902 |
| ecb_00035 | dapB | 0.477256155  | 0.241104173 |
| ecb_00440 | qmcA | -0.231089712 | 0.244130436 |
| ecb_02760 | yggD | 0.231917485  | 0.244132797 |
| ecb_00556 | fepG | -0.358914884 | 0.244132797 |
| ecb_03762 | yihP | 0.270829593  | 0.246313309 |
| ecb_04277 | arcA | -0.256474066 | 0.246432868 |
| ecb_01062 | rimJ | 0.235075288  | 0.246432868 |
| ecb_00861 | potH | 0.273110495  | 0.246480569 |
| ecb_02663 | tcdA | -0.226734938 | 0.246868254 |
| ecb_02494 | yfiB | -0.217181779 | 0.24874619  |
| ecb_03259 | yhgF | 0.274838472  | 0.249683616 |
| ecb_03200 | slyD | 0.213816405  | 0.256140112 |
| ecb_03821 | rpmE | -0.252956515 | 0.256216537 |

|           |      |              |             |
|-----------|------|--------------|-------------|
| ecb_01184 | lolB | 0.241388065  | 0.257598017 |
| ecb_01104 | ycfP | 0.164374077  | 0.257708956 |
| ecb_00554 | fepE | -0.239176711 | 0.259706291 |
| ecb_02888 | ygiQ | 0.194973617  | 0.259706291 |
| ecb_00795 | iaaA | 0.348214744  | 0.260637476 |
| ecb_02725 | dsbC | 0.239744511  | 0.260637476 |
| ecb_00597 | lipA | -0.174872617 | 0.261061726 |
| ecb_01050 | lpxL | -0.253334663 | 0.262067142 |
| ecb_04013 | groL | 0.242685075  | 0.263071628 |
| ecb_03480 | waaV | 0.225873866  | 0.263071628 |
| ecb_01782 | pabB | 0.222449291  | 0.263071628 |
| ecb_01731 | ynjI | 0.25822262   | 0.263071628 |
| ecb_00874 | ybjT | 0.206705773  | 0.26354268  |
| ecb_01219 | oppC | 0.298640366  | 0.264474563 |
| ecb_03736 | fadA | -0.402770357 | 0.265096341 |
| ecb_01883 | yedV | -0.420011824 | 0.267062022 |
| ecb_04111 | ridA | 0.18776668   | 0.267675282 |
| ecb_02492 | yfiR | -0.328304814 | 0.268772775 |
| ecb_01237 | trpD | 0.227654029  | 0.270438209 |
| ecb_01779 | yoaB | -0.285884909 | 0.270928363 |
| ecb_03264 | bioH | 0.182532867  | 0.272029835 |
| ecb_01183 | ispE | 0.222959898  | 0.274338021 |
| ecb_01919 | yeeZ | -0.181607289 | 0.276373329 |
| ecb_00143 | gluQ | 0.203912333  | 0.276373329 |
| ecb_02961 | uxaC | 0.222111614  | 0.276373329 |
| ecb_02790 | trmI | 0.172355657  | 0.277710435 |
| ecb_00962 | sulA | -0.304586314 | 0.278303371 |
| ecb_03379 | bcsZ | -0.247307684 | 0.282821531 |
| ecb_00420 | apt  | 0.188822606  | 0.2832863   |
| ecb_04085 | cpdB | -0.193342544 | 0.283627897 |
| ecb_04237 | yjjA | 0.185060546  | 0.283627897 |
| ecb_01420 | yddH | 0.196724914  | 0.283627897 |
| ecb_04268 | slt  | 0.209306448  | 0.283627897 |
| ecb_00781 | ompX | -0.234331416 | 0.286914794 |
| ecb_01220 | oppD | 0.265899174  | 0.286914794 |
| ecb_02388 | hda  | 0.270516065  | 0.287152888 |
| ecb_00422 | ybaB | 0.181932509  | 0.288205825 |
| ecb_00271 | yahA | -0.248776004 | 0.288205825 |
| ecb_00112 | pdhR | 0.29821406   | 0.288205825 |
| ecb_01012 | rutD | -0.231178623 | 0.288205825 |
| ecb_02766 | loiP | 0.183387818  | 0.288205825 |
| ecb_02505 | smpA | -0.205995009 | 0.288205825 |
| ecb_02781 | yggS | 0.170609399  | 0.289692045 |
| ecb_00632 | umpH | 0.255866722  | 0.289791376 |
| ecb_03215 | tsgA | 0.421944744  | 0.289962069 |
| ecb_03942 | nrfA | -0.228675711 | 0.2906779   |
| ecb_00202 | yafD | 0.175541869  | 0.290903941 |
| ecb_00246 | yagU | -0.392223855 | 0.290903941 |
| ecb_03803 | cdh  | 0.195993519  | 0.290903941 |
| ecb_02241 | accD | 0.316738759  | 0.291051133 |

|           |      |              |             |
|-----------|------|--------------|-------------|
| ecb_01015 | rutA | -0.29429973  | 0.291051133 |
| ecb_01047 | yceK | -0.308492543 | 0.291051133 |
| ecb_03016 | diaA | -0.22123727  | 0.291051133 |
| ecb_00327 | yaiZ | -0.457958323 | 0.291051133 |
| ecb_01835 | yebC | 0.248353244  | 0.291051133 |
| ecb_04274 | creB | 0.19096819   | 0.291880045 |
| ecb_01443 | ddpC | -0.336127739 | 0.292444766 |
| ecb_02735 | gcvP | 0.363710327  | 0.292973843 |
| ecb_03700 | pldA | -0.310339306 | 0.292973843 |
| ecb_02063 | dld  | 0.194712334  | 0.293639823 |
| ecb_03913 | plsB | 0.19680322   | 0.293662749 |
| ecb_02708 | yqeB | -0.324842975 | 0.295073362 |
| ecb_03249 | nudE | -0.230031632 | 0.297710568 |
| ecb_03641 | yieP | -0.1921225   | 0.29810006  |
| ecb_03802 | sbp  | 0.294610428  | 0.29810006  |
| ecb_01671 | ppsA | -0.221268459 | 0.298704601 |
| ecb_00780 | rhtA | 0.255548911  | 0.299832444 |
| ecb_03738 | pepQ | -0.185054356 | 0.299832444 |
| ecb_01271 | sapA | 0.315513965  | 0.300315453 |
| ecb_04118 | tabA | 0.206039689  | 0.300315453 |
| ecb_04249 | yjjG | 0.251675269  | 0.310056683 |
| ecb_00166 | map  | 0.189337695  | 0.311348754 |
| ecb_01529 | ydfU | 0.213513305  | 0.313745209 |
| ecb_02135 | napF | 0.175361621  | 0.314687621 |
| ecb_00923 | ycbJ | -0.193712983 | 0.316256069 |
| ecb_01552 | ynfB | -0.219804735 | 0.316256069 |
| ecb_03742 | mobB | -0.282636771 | 0.316256069 |
| ecb_00472 | purK | -0.19829848  | 0.317842287 |
| ecb_02225 | yfcE | -0.239878193 | 0.320522222 |
| ecb_00006 | yaaA | 0.191685528  | 0.321332789 |
| ecb_02792 | yggX | 0.191469117  | 0.322762851 |
| ecb_02670 | recC | 0.232202141  | 0.326257398 |
| ecb_01504 | pinR | -0.524267592 | 0.326257398 |
| ecb_02080 | galS | -0.27079352  | 0.326805686 |
| ecb_04253 | yjjU | 0.217986348  | 0.327214661 |
| ecb_02791 | mutY | 0.230416381  | 0.327214661 |
| ecb_01105 | ndh  | 0.402942319  | 0.327214661 |
| ecb_00882 | ybjX | -0.291023179 | 0.327466946 |
| ecb_03481 | waaJ | 0.171018884  | 0.329400641 |
| ecb_00928 | mukB | 0.241699736  | 0.329690451 |
| ecb_04032 | orn  | 0.240096718  | 0.333742001 |
| ecb_00142 | pcnB | 0.258387252  | 0.334389582 |
| ecb_02767 | speB | 0.250200833  | 0.336582132 |
| ecb_03739 | yigZ | -0.213023591 | 0.338391391 |
| ecb_00101 | yacG | 0.174945315  | 0.340217403 |
| ecb_02589 | ygbM | 0.200324951  | 0.34046567  |
| ecb_03827 | metF | 0.337347423  | 0.342812049 |
| ecb_01897 | cbl  | -0.201526589 | 0.343391022 |
| ecb_02726 | xerD | 0.162491224  | 0.343391022 |
| ecb_01240 | yciV | 0.256969936  | 0.343391022 |

|           |      |              |             |
|-----------|------|--------------|-------------|
| ecb_01056 | bssS | -0.278810939 | 0.343391022 |
| ecb_01293 | ycjT | 0.20252502   | 0.343391022 |
| ecb_01138 | bluF | 0.20521757   | 0.343391022 |
| ecb_00031 | lspA | 0.333287237  | 0.343391022 |
| ecb_00329 | iraP | 0.225694497  | 0.343995253 |
| ecb_02221 | ackA | 0.185191554  | 0.344764479 |
| ecb_03872 | rsd  | -0.285071637 | 0.344806484 |
| ecb_02920 | yqij | 0.251333108  | 0.344806484 |
| ecb_01274 | puuA | -0.314574577 | 0.346405586 |
| ecb_00096 | ftsZ | -0.151055484 | 0.346405586 |
| ecb_02189 | menB | 0.339235873  | 0.346405586 |
| ecb_01678 | btuD | -0.207599066 | 0.346405586 |
| ecb_00875 | ltaE | 0.219081125  | 0.346405586 |
| ecb_02870 | hybC | 0.218245029  | 0.346405586 |
| ecb_03623 | atpl | -0.219215238 | 0.347081743 |
| ecb_01482 | sad  | 0.198632431  | 0.347115718 |
| ecb_02881 | metC | 0.252617529  | 0.347115718 |
| ecb_03547 | yicN | 0.23755425   | 0.347115718 |
| ecb_03028 | mtr  | 0.192060733  | 0.347558479 |
| ecb_01816 | ptrB | 0.212791565  | 0.347558479 |
| ecb_02161 | nrdB | -0.239314665 | 0.347558479 |
| ecb_01590 | malX | -0.271923821 | 0.347558479 |
| ecb_02624 | eno  | -0.164418581 | 0.347558479 |
| ecb_02967 | yqjD | 0.151936929  | 0.347558479 |
| ecb_00944 | elfC | -0.273184061 | 0.347558479 |
| ecb_00564 | entH | -0.529298226 | 0.347558479 |
| ecb_01128 | phoP | -0.266053975 | 0.347558479 |
| ecb_02190 | menH | 0.233586203  | 0.347558479 |
| ecb_02752 | ygfl | 0.204945886  | 0.347674351 |
| ecb_03735 | fre  | -0.418004167 | 0.347674351 |
| ecb_01251 | cysB | 0.296586513  | 0.347674351 |
| ecb_01386 | tehA | 0.255573717  | 0.347674351 |
| ecb_03794 | sodA | -0.159512256 | 0.349393001 |
| ecb_02392 | purN | 0.1926894    | 0.351140873 |
| ecb_02903 | yqiA | 0.200039107  | 0.352175383 |
| ecb_03915 | lexA | -0.200518675 | 0.352203071 |
| ecb_01863 | flhD | -0.25011122  | 0.355554241 |
| ecb_03891 | metH | -0.197093569 | 0.356625093 |
| ecb_02479 | pssA | -0.169154057 | 0.356625093 |
| ecb_00549 | entD | -0.377828181 | 0.358280672 |
| ecb_00127 | yadH | 0.203286546  | 0.360457753 |
| ecb_02528 | ygaM | -0.31118534  | 0.360457753 |
| ecb_01520 | ydfR | -0.220199057 | 0.361173475 |
| ecb_00561 | entE | -0.32586772  | 0.361528426 |
| ecb_00223 | rayT | -0.17315092  | 0.362733945 |
| ecb_01819 | yebG | -0.274286716 | 0.362733945 |
| ecb_01297 | ycjW | 0.231361243  | 0.36344334  |
| ecb_03207 | yhfA | -0.195163926 | 0.363658604 |
| ecb_04215 | hsdM | 0.18925251   | 0.36871145  |
| ecb_03911 | ubiC | -0.199754903 | 0.36871145  |

|           |      |              |             |
|-----------|------|--------------|-------------|
| ecb_02320 | yfeS | -0.364292058 | 0.368733619 |
| ecb_03362 | mdtF | 0.209656979  | 0.369130788 |
| ecb_00550 | fepA | -0.279482792 | 0.369130788 |
| ecb_02727 | fldB | -0.164389206 | 0.369130788 |
| ecb_02265 | fadJ | -0.278758464 | 0.37471682  |
| ecb_01836 | nudB | 0.264476971  | 0.375217025 |
| ecb_03983 | basS | 0.167434738  | 0.378206642 |
| ecb_02264 | sixA | -0.234518048 | 0.378647513 |
| ecb_01564 | ynfL | 0.185987019  | 0.379458442 |
| ecb_01124 | potA | 0.228018753  | 0.382241765 |
| ecb_00334 | yail | 0.261324016  | 0.383621531 |
| ecb_00477 | ybcI | -0.205022596 | 0.386436985 |
| ecb_02162 | yfaE | -0.305475506 | 0.386842731 |
| ecb_02327 | murR | 0.214599145  | 0.387384788 |
| ecb_03819 | cytR | 0.200375469  | 0.387384788 |
| ecb_01986 | yegQ | 0.173802681  | 0.393377557 |
| ecb_01013 | rutC | -0.229729325 | 0.394660798 |
| ecb_03606 | bgfI | 0.233020316  | 0.398421669 |
| ecb_00432 | ybaK | -0.182527713 | 0.398421669 |
| ecb_01395 | hicB | -0.159811    | 0.398421669 |
| ecb_01486 | marC | -0.201839986 | 0.399428681 |
| ecb_03017 | yraP | -0.194235735 | 0.400458886 |
| ecb_02089 | yeil | -0.181670414 | 0.403342359 |
| ecb_01064 | yceM | 0.207520076  | 0.403342359 |
| ecb_02543 | gshA | 0.139279608  | 0.403342359 |
| ecb_02734 | ygff | 0.19913779   | 0.403342359 |
| ecb_02549 | recA | -0.194897065 | 0.403342359 |
| ecb_00398 | cof  | 0.290125113  | 0.403342359 |
| ecb_02776 | rsmE | 0.234897052  | 0.403342359 |
| ecb_00862 | potI | 0.242471335  | 0.403342359 |
| ecb_00135 | yadK | -0.199552535 | 0.403342359 |
| ecb_02468 | nadB | 0.225705254  | 0.403342359 |
| ecb_03105 | yhdP | -0.206060299 | 0.405140052 |
| ecb_03914 | dgkA | 0.169300461  | 0.40583699  |
| ecb_00869 | artP | 0.134948616  | 0.406123167 |
| ecb_02231 | hisP | -0.220265928 | 0.40837188  |
| ecb_03144 | yhdN | -0.206663233 | 0.40837188  |
| ecb_02963 | exuR | 0.181343574  | 0.410268392 |
| ecb_00417 | ybaM | -0.196589294 | 0.410268392 |
| ecb_00887 | clpA | -0.252331771 | 0.410268392 |
| ecb_02191 | menD | 0.15759771   | 0.414960998 |
| ecb_01236 | trpC | 0.173373449  | 0.414960998 |
| ecb_02056 | mlrA | -0.241591647 | 0.415017521 |
| ecb_01051 | yceA | -0.181798917 | 0.415017521 |
| ecb_04259 | deoB | 0.282030145  | 0.415017521 |
| ecb_00267 | betA | -0.221970287 | 0.420397236 |
| ecb_00038 | caiF | -0.149325235 | 0.420890083 |
| ecb_03500 | rph  | 0.383701127  | 0.421328754 |
| ecb_01783 | nudL | 0.174152199  | 0.421328754 |
| ecb_00144 | dksA | 0.271335971  | 0.423870858 |

|           |      |              |             |
|-----------|------|--------------|-------------|
| ecb_02607 | cysH | 0.211435555  | 0.42417684  |
| ecb_04217 | mrr  | -0.141180267 | 0.424985955 |
| ecb_01048 | msyB | -0.174572715 | 0.42624105  |
| ecb_01005 | agp  | -0.178602758 | 0.42624105  |
| ecb_00922 | kdsB | -0.186047198 | 0.426882393 |
| ecb_00927 | mukE | 0.263061704  | 0.426882393 |
| ecb_03196 | tusD | 0.213385311  | 0.426882393 |
| ecb_01562 | ynfK | -0.217111889 | 0.428137843 |
| ecb_03816 | hslU | 0.159213716  | 0.428208331 |
| ecb_01310 | uspE | -0.208383364 | 0.428904492 |
| ecb_01098 | fhuE | -0.27670905  | 0.430446878 |
| ecb_01613 | ydhl | -0.242696852 | 0.430446878 |
| ecb_00578 | rnk  | 0.267793001  | 0.432006637 |
| ecb_04263 | ytjB | 0.157872578  | 0.434907444 |
| ecb_01582 | manA | 0.249421103  | 0.436311227 |
| ecb_00415 | acrR | 0.214844741  | 0.436311227 |
| ecb_01840 | yecN | 0.143482134  | 0.436357104 |
| ecb_01650 | sufD | -0.212607317 | 0.442468859 |
| ecb_00930 | ycbK | -0.199088563 | 0.44317636  |
| ecb_03874 | hemE | 0.179543509  | 0.443466193 |
| ecb_03085 | nanA | 0.294172771  | 0.443511468 |
| ecb_02487 | pheL | -0.38217485  | 0.444475952 |
| ecb_00710 | galK | 0.18416193   | 0.44547612  |
| ecb_04246 | rsmC | 0.216557141  | 0.445477856 |
| ecb_02989 | garK | 0.233074073  | 0.445955579 |
| ecb_01083 | yceF | -0.198946989 | 0.449551232 |
| ecb_01257 | lapB | -0.215718541 | 0.449551232 |
| ecb_00346 | sbcD | 0.164273492  | 0.449551232 |
| ecb_03513 | yicH | -0.157491149 | 0.449551232 |
| ecb_01054 | yceO | -0.438989165 | 0.449551232 |
| ecb_00249 | ecpD | 0.224519248  | 0.449551232 |
| ecb_00695 | ybgE | 0.212460141  | 0.449551232 |
| ecb_01802 | proQ | 0.156197956  | 0.449551232 |
| ecb_00565 | cstA | -0.268687188 | 0.449551232 |
| ecb_03272 | rtcB | 0.157130617  | 0.449551232 |
| ecb_03347 | prlC | 0.220315537  | 0.449551232 |
| ecb_00060 | rluA | -0.233561325 | 0.449551232 |
| ecb_01890 | yeel | -0.227816768 | 0.449551232 |
| ecb_01370 | aldA | -0.358874205 | 0.449551232 |
| ecb_00093 | ddlB | -0.223838279 | 0.449551232 |
| ecb_01101 | lpoB | 0.164684964  | 0.449551232 |
| ecb_02801 | yeeR | -0.235766762 | 0.449551232 |
| ecb_02544 | yqaA | 0.213095349  | 0.449551232 |
| ecb_03568 | yidE | -0.171055768 | 0.449551232 |
| ecb_00187 | rof  | -0.220389927 | 0.449551232 |
| ecb_02597 | ispD | 0.182410151  | 0.449551232 |
| ecb_00926 | mukF | 0.225451789  | 0.449551232 |
| ecb_01921 | hisG | 0.225230381  | 0.449551232 |
| ecb_01108 | bhsA | 0.164853379  | 0.449551232 |
| ecb_01885 | yedX | -0.253110585 | 0.449551232 |

|           |      |              |             |
|-----------|------|--------------|-------------|
| ecb_02408 | rodZ | -0.319661408 | 0.449551232 |
| ecb_03265 | gntX | 0.199009001  | 0.457723381 |
| ecb_00579 | rna  | 0.177255341  | 0.461405632 |
| ecb_00160 | degP | 0.182269559  | 0.463560435 |
| ecb_02702 | ygeV | 0.292545657  | 0.465096858 |
| ecb_00054 | apaG | 0.195168556  | 0.465096858 |
| ecb_00097 | lpxC | -0.135722271 | 0.465096858 |
| ecb_02722 | lysS | 0.212792156  | 0.465806952 |
| ecb_00562 | entB | -0.510140987 | 0.467491682 |
| ecb_03447 | yibF | -0.177982048 | 0.467491682 |
| ecb_02743 | ygfA | -0.275253373 | 0.467586329 |
| ecb_01946 | rfbD | -0.267345074 | 0.468800824 |
| ecb_04186 | fimD | 0.199147449  | 0.468800824 |
| ecb_02996 | agaR | 0.171794224  | 0.468975417 |
| ecb_03732 | tatD | -0.147908735 | 0.471351472 |
| ecb_00563 | entA | -0.519112659 | 0.471351472 |
| ecb_02664 | mltA | -0.219019344 | 0.471351472 |
| ecb_02555 | srlD | 0.21423286   | 0.471351472 |
| ecb_00034 | rihC | 0.239791991  | 0.471351472 |
| ecb_01491 | marB | 0.309241083  | 0.472237439 |
| ecb_00889 | aat  | 0.190613509  | 0.473412076 |
| ecb_01981 | mdtB | -0.249417133 | 0.473412076 |
| ecb_04037 | mutL | 0.239751914  | 0.473634434 |
| ecb_02553 | srlE | 0.328255449  | 0.473634434 |
| ecb_04247 | hold | 0.26502659   | 0.47467573  |
| ecb_01238 | trpE | 0.213425736  | 0.47467573  |
| ecb_00408 | ylaB | -0.145373405 | 0.475624757 |
| ecb_00619 | insJ | -0.235434421 | 0.476162103 |
| ecb_00056 | pdxA | 0.193241798  | 0.477260809 |
| ecb_00993 | ymcE | -0.359716573 | 0.477830018 |
| ecb_00694 | cydX | 0.306618213  | 0.480840725 |
| ecb_02444 | hmp  | 0.153195605  | 0.481227159 |
| ecb_00252 | ecpA | -0.215292373 | 0.481227159 |
| ecb_01710 | cho  | -0.247950518 | 0.484249467 |
| ecb_01903 | yoeA | 0.211677154  | 0.484249467 |
| ecb_01404 | ydcZ | -0.190879496 | 0.484895972 |
| ecb_02595 | truD | 0.138459014  | 0.486577969 |
| ecb_00383 | cyoA | 0.126178796  | 0.487759223 |
| ecb_03349 | gor  | 0.196876989  | 0.487759223 |
| ecb_01973 | yegE | 0.177116717  | 0.488606063 |
| ecb_03912 | ubiA | -0.201179443 | 0.489010796 |
| ecb_01126 | ycfD | -0.180616942 | 0.489010796 |
| ecb_01601 | rsxG | -0.15111933  | 0.491255761 |
| ecb_02128 | ccmA | 0.167311889  | 0.49159897  |
| ecb_00272 | yahB | 0.214550388  | 0.49330198  |
| ecb_02084 | cirA | -0.428646716 | 0.494671824 |
| ecb_01823 | zwf  | -0.259257897 | 0.495360851 |
| ecb_04114 | pyrL | 0.211321584  | 0.496619315 |
| ecb_01565 | ynfM | 0.320789558  | 0.497256998 |
| ecb_02185 | arnF | -0.203632574 | 0.497256998 |

|           |      |              |             |
|-----------|------|--------------|-------------|
| ecb_00266 | ykgH | -0.20587294  | 0.497355719 |
| ecb_02960 | uxaA | 0.206024865  | 0.497355719 |
| ecb_00518 | appY | 0.193264874  | 0.497355719 |
| ecb_02042 | yehE | 0.176783743  | 0.499302197 |
| ecb_01597 | rsxA | -0.228384149 | 0.499302197 |
| ecb_02471 | yfiE | 0.259920213  | 0.499586864 |
| ecb_03211 | pabA | 0.136556392  | 0.499760983 |
| ecb_01647 | ynhG | -0.20117192  | 0.500358255 |
| ecb_04088 | ytfK | -0.164684443 | 0.500679665 |
| ecb_00931 | ycbL | -0.166740466 | 0.502476724 |
| ecb_01018 | putP | -0.246174183 | 0.502763785 |
| ecb_04017 | efp  | 0.172656926  | 0.503044598 |
| ecb_01577 | rstA | -0.22143175  | 0.503244551 |
| ecb_03845 | argH | -0.201219404 | 0.503244551 |
| ecb_02609 | cysJ | 0.250090477  | 0.503244551 |
| ecb_01019 | efeU | -0.38934711  | 0.503244551 |
| ecb_01049 | mdtG | -0.208211807 | 0.506795281 |
| ecb_01644 | ydhZ | -0.251616759 | 0.509353265 |
| ecb_00055 | rsmA | 0.141080181  | 0.509666573 |
| ecb_02455 | yfhH | 0.15056826   | 0.509666573 |
| ecb_00102 | zapD | 0.147330544  | 0.509666573 |
| ecb_00959 | ycbZ | -0.149325014 | 0.509666573 |
| ecb_03281 | glgA | 0.168710259  | 0.509666573 |
| ecb_01436 | adhP | -0.188832839 | 0.509714344 |
| ecb_03455 | mtlD | 0.150778587  | 0.509714344 |
| ecb_03062 | kdsD | -0.130911867 | 0.509714344 |
| ecb_02938 | mug  | 0.205357131  | 0.510259089 |
| ecb_00765 | ybiA | -0.148121008 | 0.510640272 |
| ecb_00222 | yafL | 0.19869101   | 0.510640272 |
| ecb_00891 | cydD | 0.270066682  | 0.510640272 |
| ecb_04196 | hypT | 0.164098097  | 0.510640272 |
| ecb_01596 | ydgK | 0.195165518  | 0.510640272 |
| ecb_01061 | mdtH | 0.185648929  | 0.512907474 |
| ecb_03378 | bcsC | -0.216167776 | 0.512907474 |
| ecb_00132 | panC | 0.139421155  | 0.512907474 |
| ecb_02940 | yqjI | 0.182148051  | 0.512907474 |
| ecb_02554 | srlB | 0.280195916  | 0.512907474 |
| ecb_03698 | rarD | 0.193409449  | 0.512907474 |
| ecb_03812 | glpF | 0.387990026  | 0.512907474 |
| ecb_01423 | narV | 0.188867598  | 0.513414976 |
| ecb_01127 | phoQ | -0.191187019 | 0.513441991 |
| ecb_00766 | dinG | -0.274200368 | 0.514269294 |
| ecb_02470 | srmB | 0.18165485   | 0.514479034 |
| ecb_02377 | hyfE | 0.138117408  | 0.517550576 |
| ecb_01866 | otsB | -0.173153461 | 0.517550576 |
| ecb_03502 | dinD | 0.15749411   | 0.520423168 |
| ecb_03257 | ompR | 0.159785652  | 0.521714328 |
| ecb_02879 | exbD | 0.277917654  | 0.522026812 |
| ecb_02156 | yfaA | -0.158814517 | 0.522026812 |
| ecb_02305 | yfeD | -0.295100034 | 0.524826072 |



|           |      |              |             |
|-----------|------|--------------|-------------|
| ecb_00676 | ybgO | 0.148711892  | 0.524826072 |
| ecb_02493 | yfiN | -0.199381958 | 0.531492246 |
| ecb_04112 | pyrI | 0.163655751  | 0.532841078 |
| ecb_02245 | pdxB | 0.182596321  | 0.532841078 |
| ecb_02517 | gabD | -0.229545606 | 0.533547706 |
| ecb_00483 | sfmH | 0.245169243  | 0.536725629 |
| ecb_01787 | manX | 0.19269029   | 0.538516971 |
| ecb_02250 | yfcl | -0.183410863 | 0.538516971 |
| ecb_03727 | ubij | 0.150126661  | 0.538516971 |
| ecb_03886 | aceB | -0.298708465 | 0.538516971 |
| ecb_02291 | ypdB | 0.171306524  | 0.538900576 |
| ecb_00079 | ilvI | -0.130016024 | 0.53931156  |
| ecb_00921 | ycaR | -0.124732593 | 0.53931156  |
| ecb_00788 | ybiU | -0.177248891 | 0.53931156  |
| ecb_00974 | yccA | -0.180234266 | 0.53931156  |
| ecb_03825 | metB | 0.176721918  | 0.539767391 |
| ecb_02784 | rdgB | 0.201771546  | 0.540731828 |
| ecb_01648 | sufE | -0.347306499 | 0.546669597 |
| ecb_00794 | moeA | 0.291406974  | 0.54754532  |
| ecb_00009 | mog  | 0.180328691  | 0.549991824 |
| ecb_02186 | pmrD | -0.287658372 | 0.550297737 |
| ecb_04062 | ulaC | 0.149927525  | 0.550501705 |
| ecb_04029 | mscM | 0.194068124  | 0.551132971 |
| ecb_01424 | narW | 0.238179879  | 0.551132971 |
| ecb_01063 | yceH | 0.174113123  | 0.553106262 |
| ecb_02457 | acpS | 0.147688076  | 0.553106262 |
| ecb_02522 | yqaE | 0.221026142  | 0.553106262 |
| ecb_00015 | dnaJ | 0.203665271  | 0.553870289 |
| ecb_00094 | ftsQ | -0.217409797 | 0.553870289 |
| ecb_00786 | ybiS | 0.152311475  | 0.554312278 |
| ecb_00863 | ybjO | 0.180017717  | 0.554404557 |
| ecb_03669 | rffA | 0.154383046  | 0.556086028 |
| ecb_04205 | yjiN | 0.192805305  | 0.556153941 |
| ecb_03653 | ppiC | -0.228363776 | 0.556235156 |
| ecb_00424 | htpG | 0.198292581  | 0.556235156 |
| ecb_00712 | galE | 0.144565386  | 0.557653577 |
| ecb_00367 | yajO | -0.183969244 | 0.559997212 |
| ecb_03924 | dnaB | 0.137668348  | 0.560187683 |
| ecb_03003 | agaS | 0.221402938  | 0.563156892 |
| ecb_00067 | yabl | -0.174301771 | 0.563156892 |
| ecb_01011 | rutE | -0.234624793 | 0.563156892 |
| ecb_00193 | proS | 0.135648671  | 0.563156892 |
| ecb_01390 | ydcM | -0.19095048  | 0.563781229 |
| ecb_01898 | nac  | -0.239130069 | 0.566075358 |
| ecb_01980 | mdtC | -0.128017165 | 0.566647849 |
| ecb_04012 | groS | 0.21318916   | 0.568354071 |
| ecb_02140 | ada  | 0.155227855  | 0.570014604 |
| ecb_00867 | artQ | 0.259441908  | 0.571599792 |
| ecb_03103 | aaeR | 0.16965787   | 0.572584109 |
| ecb_00358 | yajD | -0.124426962 | 0.572929865 |

|           |      |              |             |
|-----------|------|--------------|-------------|
| ecb_03434 | sgbU | -0.122810174 | 0.573225973 |
| ecb_01553 | speG | -0.157310733 | 0.57331472  |
| ecb_03499 | pyrE | 0.222322164  | 0.57331472  |
| ecb_00917 | ycal | -0.157327406 | 0.573702317 |
| ecb_01316 | abgR | -0.207950562 | 0.574291789 |
| ecb_03231 | php  | 0.15919422   | 0.574291789 |
| ecb_04018 | ecnA | 0.168737313  | 0.574291789 |
| ecb_03984 | basR | 0.126657284  | 0.574877848 |
| ecb_01634 | mdtK | 0.193804465  | 0.574877848 |
| ecb_02360 | narQ | 0.142060854  | 0.576986532 |
| ecb_01807 | yebV | -0.140023226 | 0.578034912 |
| ecb_01002 | cbpM | -0.130822361 | 0.578952737 |
| ecb_00973 | tusE | -0.212809421 | 0.580447059 |
| ecb_03094 | degQ | 0.129071345  | 0.582969294 |
| ecb_01845 | cutC | -0.215053398 | 0.582969294 |
| ecb_01027 | ycdT | -0.173006776 | 0.583181983 |
| ecb_04014 | yjel | -0.162881812 | 0.584881009 |
| ecb_01106 | ycfJ | 0.326421708  | 0.585532352 |
| ecb_04273 | creA | 0.220560406  | 0.58723766  |
| ecb_01978 | yegL | 0.142057574  | 0.587848331 |
| ecb_02681 | ygdR | -0.178391711 | 0.587848331 |
| ecb_00278 | yahl | 0.15844668   | 0.587848331 |
| ecb_00876 | poxB | -0.174163449 | 0.587848331 |
| ecb_01611 | slyB | -0.234926546 | 0.587848331 |
| ecb_03299 | ugpC | -0.137815534 | 0.588382769 |
| ecb_03846 | oxyR | -0.131148334 | 0.588382769 |
| ecb_02304 | yfeC | -0.251971205 | 0.588382769 |
| ecb_03479 | waaL | 0.187146973  | 0.590349155 |
| ecb_02321 | cysM | -0.216784187 | 0.590349155 |
| ecb_00595 | ybeM | 0.127807258  | 0.590349155 |
| ecb_00133 | panB | 0.186918084  | 0.591775271 |
| ecb_00660 | ybfO | 0.171070269  | 0.591775271 |
| ecb_03083 | nanE | 0.174462017  | 0.591775271 |
| ecb_03380 | bcsB | -0.169305394 | 0.591775271 |
| ecb_00316 | tauB | 0.242145423  | 0.593093578 |
| ecb_03291 | yhhX | 0.1502077    | 0.594227912 |
| ecb_00095 | ftsA | -0.160020303 | 0.597275515 |
| ecb_03049 | yhbE | -0.200396447 | 0.598328506 |
| ecb_03494 | rpmB | -0.151882505 | 0.598328506 |
| ecb_00423 | recR | 0.297943388  | 0.6011174   |
| ecb_00899 | dmsB | 0.152042773  | 0.604299617 |
| ecb_00224 | fhiA | 0.160550282  | 0.604361678 |
| ecb_03217 | nirD | 0.192194918  | 0.605505105 |
| ecb_01321 | ttcA | 0.151012801  | 0.605505105 |
| ecb_01656 | ydiJ | 0.339504787  | 0.605505105 |
| ecb_04248 | rimI | 0.251235836  | 0.605505105 |
| ecb_02762 | yggP | 0.176804744  | 0.608417366 |
| ecb_03482 | waaY | 0.153114261  | 0.608417366 |
| ecb_01697 | ydjM | 0.209091048  | 0.609308804 |
| ecb_02521 | ygaU | 0.156224679  | 0.609343325 |

|           |      |              |             |
|-----------|------|--------------|-------------|
| ecb_01824 | yebK | -0.176435689 | 0.609343325 |
| ecb_02043 | mrp  | -0.245015805 | 0.609343325 |
| ecb_02625 | pyrG | -0.194927528 | 0.614579243 |
| ecb_03487 | waaP | 0.136457231  | 0.614579243 |
| ecb_02106 | rtn  | 0.197949367  | 0.614579243 |
| ecb_01234 | trpA | 0.130009669  | 0.616729008 |
| ecb_04187 | fimF | 0.126473063  | 0.620430562 |
| ecb_01435 | yddM | -0.282498311 | 0.620430562 |
| ecb_00853 | ybjM | -0.13097752  | 0.621002837 |
| ecb_01545 | ydfE | 0.216712175  | 0.621255672 |
| ecb_00289 | prpE | 0.115148029  | 0.621255672 |
| ecb_04104 | cybC | 0.133132707  | 0.622599821 |
| ecb_00328 | ddlA | 0.208390693  | 0.62293323  |
| ecb_03876 | yjaG | 0.212622161  | 0.62293323  |
| ecb_00172 | ispU | -0.172592513 | 0.623616603 |
| ecb_04120 | argI | 0.18948857   | 0.623616603 |
| ecb_01538 | dicC | 0.201583554  | 0.624000951 |
| ecb_01255 | pgpB | -0.216933963 | 0.626146706 |
| ecb_02608 | cysI | 0.184124321  | 0.627255561 |
| ecb_00296 | lacA | -0.200484147 | 0.631785557 |
| ecb_01365 | ynbC | 0.188423366  | 0.634908393 |
| ecb_01221 | oppF | 0.140675919  | 0.634908393 |
| ecb_01570 | tqsA | -0.203264032 | 0.634908393 |
| ecb_02124 | ccmE | 0.204590045  | 0.637992366 |
| ecb_01593 | ydgJ | -0.139067939 | 0.640369788 |
| ecb_03558 | yidF | -0.251345199 | 0.643449042 |
| ecb_03745 | rdoA | 0.144592685  | 0.644082079 |
| ecb_02391 | purM | 0.139836851  | 0.64440411  |
| ecb_01442 | ddpD | -0.2733763   | 0.64440411  |
| ecb_02622 | queE | -0.166652468 | 0.646105524 |
| ecb_03651 | ilvY | -0.207055968 | 0.646150069 |
| ecb_03824 | metJ | 0.207713687  | 0.647932893 |
| ecb_04199 | yjiH | 0.164121789  | 0.648699921 |
| ecb_00147 | hrpB | 0.183625112  | 0.651723641 |
| ecb_00770 | ybil | -0.11090267  | 0.653303582 |
| ecb_01356 | feaR | -0.251528443 | 0.654056926 |
| ecb_00198 | metN | 0.174008844  | 0.654056926 |
| ecb_02894 | mqsR | 0.14184483   | 0.654056926 |
| ecb_02100 | yeiW | -0.280289234 | 0.654056926 |
| ecb_00711 | galT | 0.156308926  | 0.654056926 |
| ecb_04240 | yjiB | 0.131314954  | 0.655245158 |
| ecb_03286 | yhgN | -0.145982202 | 0.655245158 |
| ecb_02177 | nudI | -0.186797926 | 0.655245158 |
| ecb_03925 | alr  | 0.256297678  | 0.655245158 |
| ecb_00384 | ampG | 0.253217224  | 0.655245158 |
| ecb_02618 | ygcW | 0.305777575  | 0.655245158 |
| ecb_02859 | yghQ | 0.179680532  | 0.655245158 |
| ecb_03992 | yjdB | 0.172806527  | 0.655245158 |
| ecb_01834 | ruvC | 0.184394886  | 0.655245158 |
| ecb_00292 | cynR | 0.146999751  | 0.655245158 |

|           |      |              |             |
|-----------|------|--------------|-------------|
| ecb_00708 | gpmA | 0.157193776  | 0.655245158 |
| ecb_01586 | uidA | 0.145043117  | 0.656016549 |
| ecb_04256 | yjiI | 0.151706332  | 0.65625099  |
| ecb_03307 | livK | 0.139424208  | 0.65738944  |
| ecb_03106 | rng  | -0.198943061 | 0.65738944  |
| ecb_00262 | ykgE | 0.170275106  | 0.657985321 |
| ecb_03137 | def  | 0.113592059  | 0.660165963 |
| ecb_03489 | waaQ | 0.115741514  | 0.660165963 |
| ecb_03384 | bcsE | 0.115094872  | 0.660165963 |
| ecb_00643 | ybfF | 0.117103572  | 0.660365577 |
| ecb_04000 | lysU | 0.144545163  | 0.661867238 |
| ecb_01558 | ynfG | 0.137776181  | 0.663036128 |
| ecb_01454 | yddA | -0.16370349  | 0.663332013 |
| ecb_03493 | rpmG | -0.146948161 | 0.663604972 |
| ecb_00188 | yaeP | -0.188549319 | 0.663604972 |
| ecb_00752 | moaE | -0.120322457 | 0.66558199  |
| ecb_03025 | yhbU | 0.152875429  | 0.66558199  |
| ecb_01718 | xthA | -0.286616494 | 0.66558199  |
| ecb_02901 | ygiN | 0.141786619  | 0.668618459 |
| ecb_04275 | creC | 0.12459054   | 0.668750398 |
| ecb_02783 | yggU | 0.148863757  | 0.668793944 |
| ecb_01109 | ycfS | 0.139218903  | 0.668793944 |
| ecb_02370 | dapA | -0.116024711 | 0.668793944 |
| ecb_00061 | hepA | -0.169423296 | 0.669649252 |
| ecb_02453 | tadA | 0.117375333  | 0.669897146 |
| ecb_01494 | dgcZ | -0.282746283 | 0.670654162 |
| ecb_03468 | grxC | 0.108125613  | 0.672373235 |
| ecb_02142 | ompC | -0.161405991 | 0.672373235 |
| ecb_00667 | ybgA | -0.12861402  | 0.67242574  |
| ecb_00338 | yaiE | 0.156662528  | 0.672806797 |
| ecb_02957 | alx  | -0.138936093 | 0.672806797 |
| ecb_03138 | fmt  | 0.153583971  | 0.672903292 |
| ecb_03962 | rpiB | -0.185810163 | 0.672976481 |
| ecb_00507 | rrrD | -0.141238257 | 0.673064987 |
| ecb_02182 | arnD | 0.14376063   | 0.673064987 |
| ecb_02578 | hypC | 0.134080716  | 0.674928197 |
| ecb_03843 | argC | -0.151757513 | 0.674928197 |
| ecb_03490 | waaA | 0.265410169  | 0.676149938 |
| ecb_01380 | ydcJ | -0.153818027 | 0.676149938 |
| ecb_04045 | nsrR | -0.213138691 | 0.677969614 |
| ecb_02956 | ygjR | 0.145764447  | 0.677969614 |
| ecb_04095 | ppa  | 0.136129676  | 0.679077209 |
| ecb_00317 | tauC | 0.220078248  | 0.679738434 |
| ecb_02779 | yqgF | -0.149487703 | 0.679738434 |
| ecb_02603 | iap  | -0.135166971 | 0.680282331 |
| ecb_02438 | yphD | 0.169206396  | 0.680282331 |
| ecb_02939 | yqjH | 0.187960467  | 0.680282331 |
| ecb_03392 | dppD | 0.17819597   | 0.680282331 |
| ecb_02602 | cysD | 0.224104568  | 0.681793501 |
| ecb_01463 | ydeT | 0.246791643  | 0.681793501 |

|           |      |              |             |
|-----------|------|--------------|-------------|
| ecb_01438 | rpsV | -0.218399093 | 0.682469362 |
| ecb_03823 | yiiX | -0.120343816 | 0.682469362 |
| ecb_00155 | erpA | -0.131170414 | 0.682469362 |
| ecb_00291 | codA | 0.25025996   | 0.682469362 |
| ecb_02358 | nudK | 0.128334617  | 0.682516113 |
| ecb_01246 | btuR | 0.129671923  | 0.683089137 |
| ecb_04195 | iraD | 0.181648934  | 0.683089137 |
| ecb_01571 | pntB | 0.146718594  | 0.683499902 |
| ecb_00991 | cspH | -0.58640294  | 0.683499902 |
| ecb_00566 | ybdD | -0.149604531 | 0.684362718 |
| ecb_00709 | galM | 0.118651084  | 0.685315148 |
| ecb_03162 | rpsQ | -0.11600133  | 0.685315148 |
| ecb_03817 | hslV | 0.151517919  | 0.685315148 |
| ecb_02558 | gutQ | 0.242431802  | 0.685315148 |
| ecb_00569 | ybdM | 0.120058578  | 0.685315148 |
| ecb_01100 | ycfL | 0.135557595  | 0.685315148 |
| ecb_01400 | ydcV | 0.163966054  | 0.685315148 |
| ecb_01594 | blr  | -0.175047923 | 0.686010216 |
| ecb_02556 | gutM | 0.143988826  | 0.686010216 |
| ecb_00893 | lrp  | 0.119647013  | 0.686313235 |
| ecb_04092 | tamB | -0.189079862 | 0.689036059 |
| ecb_02643 | ygdG | 0.135773262  | 0.6894144   |
| ecb_01691 | ydiY | 0.229077189  | 0.689570165 |
| ecb_01235 | trpB | 0.109941424  | 0.689570165 |
| ecb_01415 | ydcD | -0.285715907 | 0.689570165 |
| ecb_00519 | ompT | -0.133354291 | 0.690286143 |
| ecb_04159 | fecl | -0.197333308 | 0.691819856 |
| ecb_02466 | rseA | -0.141183588 | 0.692336495 |
| ecb_03386 | bcsG | 0.131196278  | 0.692937404 |
| ecb_03799 | cpxP | -0.232131108 | 0.692937404 |
| ecb_01983 | baeS | 0.227629442  | 0.696329193 |
| ecb_04203 | yjiL | 0.166135394  | 0.696839086 |
| ecb_04211 | mcrC | -0.166854576 | 0.697358256 |
| ecb_02065 | yohC | -0.135728701 | 0.697358256 |
| ecb_01976 | yegl | 0.108926329  | 0.701343882 |
| ecb_03377 | yhjK | 0.104119276  | 0.701529935 |
| ecb_01521 | essQ | -0.214590922 | 0.702671525 |
| ecb_01362 | ydbD | 0.150865462  | 0.704085668 |
| ecb_03814 | rraA | -0.157273433 | 0.70553823  |
| ecb_00214 | yafV | 0.102080526  | 0.70553823  |
| ecb_00090 | ftsW | -0.210496287 | 0.70553823  |
| ecb_01462 | ydeS | 0.221396726  | 0.706354364 |
| ecb_00209 | yafT | -0.168180938 | 0.706531491 |
| ecb_03210 | argD | -0.199209206 | 0.707052553 |
| ecb_02017 | gatD | 0.172311969  | 0.707052553 |
| ecb_01974 | alkA | 0.180240118  | 0.707052553 |
| ecb_03256 | envZ | 0.135525227  | 0.707052553 |
| ecb_00263 | ykgF | 0.145547589  | 0.707052553 |
| ecb_01794 | yobF | -0.216877849 | 0.707052553 |
| ecb_00659 | ybfB | -0.293055681 | 0.707052553 |

|           |      |              |             |
|-----------|------|--------------|-------------|
| ecb_02979 | tdcG | 0.140135712  | 0.707052553 |
| ecb_00325 | yaiW | 0.245568249  | 0.707052553 |
| ecb_00901 | ycaC | -0.20066853  | 0.707052553 |
| ecb_02732 | yqfB | 0.173528631  | 0.707401805 |
| ecb_00854 | grxA | 0.172078914  | 0.707492848 |
| ecb_01911 | yeeA | 0.13214406   | 0.707492848 |
| ecb_02482 | clpB | 0.112822288  | 0.707866238 |
| ecb_02954 | ygjP | 0.133507654  | 0.707866238 |
| ecb_01589 | mall | -0.156383593 | 0.709504027 |
| ecb_01862 | flhC | -0.228271553 | 0.709504027 |
| ecb_01675 | ydiU | -0.175167674 | 0.709780808 |
| ecb_00462 | allB | 0.135176619  | 0.709780808 |
| ecb_02548 | recX | -0.190008638 | 0.713723557 |
| ecb_00994 | gnsA | -0.220900484 | 0.713723557 |
| ecb_02287 | yfdY | -0.179428174 | 0.713723557 |
| ecb_04021 | blc  | -0.170857274 | 0.714266797 |
| ecb_00963 | sxy  | -0.138616042 | 0.71600512  |
| ecb_02902 | parE | 0.154097204  | 0.716557848 |
| ecb_03570 | ibpA | 0.117560136  | 0.717194776 |
| ecb_03254 | yhgE | 0.144102172  | 0.717194776 |
| ecb_00741 | bioA | 0.174167766  | 0.717194776 |
| ecb_01156 | ycgN | -0.138553646 | 0.71807357  |
| ecb_02630 | rlmD | -0.134722529 | 0.718201696 |
| ecb_02239 | dedD | 0.198622425  | 0.718201696 |
| ecb_03176 | gspD | 0.197140029  | 0.720001195 |
| ecb_01910 | yeeX | 0.102473153  | 0.720001195 |
| ecb_01677 | nlpC | -0.161029162 | 0.720300816 |
| ecb_02475 | yfiF | 0.147685834  | 0.720548963 |
| ecb_01307 | mppA | 0.124870001  | 0.720707338 |
| ecb_01461 | ydeR | 0.212896223  | 0.721098446 |
| ecb_01700 | cedA | -0.123159715 | 0.721529343 |
| ecb_02557 | srlR | 0.183155588  | 0.721751294 |
| ecb_03325 | nikA | -0.174838573 | 0.722250214 |
| ecb_02274 | dsdC | 0.195928632  | 0.722250214 |
| ecb_02097 | fruK | -0.216465822 | 0.722779207 |
| ecb_01150 | minD | -0.095115559 | 0.724150474 |
| ecb_02499 | ffh  | 0.128295688  | 0.724150474 |
| ecb_02093 | psuT | 0.158366122  | 0.724357941 |
| ecb_01194 | chaA | -0.158797604 | 0.72470278  |
| ecb_02623 | ygcG | 0.20822637   | 0.725302297 |
| ecb_01600 | rsxD | -0.1224624   | 0.726192254 |
| ecb_02795 | speC | 0.131924729  | 0.726192254 |
| ecb_03123 | acrE | 0.180986755  | 0.730706693 |
| ecb_01311 | fnr  | 0.1049823    | 0.731950515 |
| ecb_04024 | frdC | 0.125986447  | 0.731950515 |
| ecb_02917 | yqiH | 0.160213262  | 0.73271288  |
| ecb_01167 | ldcA | -0.188261924 | 0.73271288  |
| ecb_02745 | rpiA | 0.15218146   | 0.733594658 |
| ecb_00541 | ybdJ | -0.1530884   | 0.733594658 |
| ecb_03038 | argG | 0.16380706   | 0.733594658 |

|           |      |              |             |
|-----------|------|--------------|-------------|
| ecb_03407 | hokA | -0.261223426 | 0.733594658 |
| ecb_02328 | murQ | 0.187251863  | 0.733594658 |
| ecb_00123 | gcd  | -0.275091103 | 0.733594658 |
| ecb_02981 | tdcE | 0.133547388  | 0.73512297  |
| ecb_01135 | iraM | -0.176144138 | 0.735225181 |
| ecb_00865 | artJ | 0.207297539  | 0.736003053 |
| ecb_04142 | yjhC | 0.117613914  | 0.738044642 |
| ecb_02233 | hisQ | -0.121322361 | 0.738044642 |
| ecb_03112 | yhdH | -0.104404805 | 0.738044642 |
| ecb_02064 | pbpG | 0.100812944  | 0.738044642 |
| ecb_00205 | gloB | -0.125900753 | 0.738044642 |
| ecb_03124 | acrF | 0.172627823  | 0.738044642 |
| ecb_02969 | yqjK | 0.118611989  | 0.738044642 |
| ecb_03551 | uhpC | -0.123975559 | 0.738044642 |
| ecb_03402 | viaD | 0.192194527  | 0.738044642 |
| ecb_00435 | copA | -0.177828871 | 0.738044642 |
| ecb_02242 | dedA | 0.152616666  | 0.738044642 |
| ecb_00071 | sgrR | 0.16486371   | 0.738044642 |
| ecb_00585 | citD | 0.165667128  | 0.738044642 |
| ecb_01369 | ydcF | 0.136771683  | 0.738044642 |
| ecb_02024 | gatY | 0.129988817  | 0.738044642 |
| ecb_02658 | ygdD | 0.11190308   | 0.738547444 |
| ecb_01133 | rluE | 0.135929024  | 0.740034853 |
| ecb_01873 | ftnA | 0.151044892  | 0.740414175 |
| ecb_03235 | yhfZ | 0.140953448  | 0.74093467  |
| ecb_03285 | asd  | 0.106392174  | 0.741684819 |
| ecb_00612 | ybeL | -0.157091022 | 0.742233165 |
| ecb_03273 | rtcR | -0.147634354 | 0.743393313 |
| ecb_03596 | yieE | -0.180352757 | 0.743414871 |
| ecb_04055 | yjfn | -0.22556433  | 0.743414871 |
| ecb_02532 | nrdF | -0.202090392 | 0.744734695 |
| ecb_03060 | mIaF | -0.159490721 | 0.74483805  |
| ecb_00553 | entF | -0.301916639 | 0.745356041 |
| ecb_00080 | ilvH | -0.153617697 | 0.745356041 |
| ecb_01201 | narU | 0.208155494  | 0.745774447 |
| ecb_04158 | fecR | -0.166593398 | 0.745774447 |
| ecb_00474 | lpxH | 0.107382138  | 0.746423326 |
| ecb_00484 | sfmF | 0.171653495  | 0.746836298 |
| ecb_01153 | pliG | 0.149254584  | 0.746867474 |
| ecb_02729 | sdhE | 0.120209184  | 0.747863241 |
| ecb_03875 | nfi  | 0.16459142   | 0.748416041 |
| ecb_02926 | cca  | 0.113463211  | 0.748810846 |
| ecb_03119 | fis  | -0.215755205 | 0.748939442 |
| ecb_02314 | cysK | 0.170507105  | 0.752721176 |
| ecb_04197 | iadA | 0.13403925   | 0.754486782 |
| ecb_01103 | nagZ | 0.132512306  | 0.75617482  |
| ecb_00637 | glnS | -0.121804982 | 0.758303644 |
| ecb_02339 | eutL | -0.242902834 | 0.758392729 |
| ecb_02584 | pphB | 0.137769384  | 0.75862744  |
| ecb_00949 | pyrD | -0.190798092 | 0.75862744  |

|           |      |              |             |
|-----------|------|--------------|-------------|
| ecb_02596 | ispF | 0.138865069  | 0.759049979 |
| ecb_04038 | miaA | 0.108592907  | 0.759422858 |
| ecb_00905 | ycaK | -0.156524742 | 0.760269103 |
| ecb_02769 | yqgB | 0.169479997  | 0.760332291 |
| ecb_02488 | pheA | -0.105777385 | 0.760976441 |
| ecb_04198 | yjiG | 0.093984688  | 0.761926465 |
| ecb_01786 | yoaE | 0.140053869  | 0.763220292 |
| ecb_02849 | glcC | -0.142018936 | 0.763220292 |
| ecb_02102 | yeiQ | -0.139344808 | 0.763220292 |
| ecb_02638 | syd  | -0.126217457 | 0.763220292 |
| ecb_02845 | glcG | -0.115146599 | 0.763220292 |
| ecb_04194 | yjiC | 0.172622425  | 0.763220292 |
| ecb_01309 | ynaJ | -0.221494797 | 0.763220292 |
| ecb_02780 | yggR | -0.122380481 | 0.763220292 |
| ecb_03887 | aceA | -0.270006077 | 0.763220292 |
| ecb_02970 | yqjF | 0.162060794  | 0.763220292 |
| ecb_02803 | yafZ | 0.158082171  | 0.763220292 |
| ecb_00382 | cyoB | 0.104458451  | 0.764035074 |
| ecb_02788 | yggN | -0.138639441 | 0.764035074 |
| ecb_00353 | queA | 0.115707673  | 0.764450213 |
| ecb_02742 | zapA | -0.13517293  | 0.764450213 |
| ecb_00908 | focA | 0.131638866  | 0.764450213 |
| ecb_02619 | yqcE | 0.137919229  | 0.764681568 |
| ecb_00880 | aqpZ | -0.137360673 | 0.765320601 |
| ecb_03509 | recG | 0.189335661  | 0.765368357 |
| ecb_02401 | xseA | -0.130915267 | 0.765368357 |
| ecb_01793 | cspC | -0.212479213 | 0.765368357 |
| ecb_04100 | fbp  | 0.136920399  | 0.765368357 |
| ecb_01300 | tyrR | 0.112595122  | 0.765828536 |
| ecb_00257 | ykgA | 0.121216231  | 0.765878706 |
| ecb_02249 | mnmc | 0.188131856  | 0.765934018 |
| ecb_01202 | narZ | 0.192684424  | 0.766048639 |
| ecb_02333 | yfeZ | -0.129773677 | 0.767032523 |
| ecb_02046 | yehl | 0.220625054  | 0.767032523 |
| ecb_03894 | rluF | -0.197997287 | 0.768166111 |
| ecb_02284 | frc  | 0.147312039  | 0.768166111 |
| ecb_03195 | tusC | 0.18277364   | 0.768488241 |
| ecb_00992 | cspG | -0.299888883 | 0.768488241 |
| ecb_03185 | gspM | 0.192567092  | 0.769017271 |
| ecb_00644 | seqA | 0.091820752  | 0.769017271 |
| ecb_02088 | nfo  | -0.141701337 | 0.769017271 |
| ecb_02869 | hybD | 0.23052619   | 0.769017271 |
| ecb_02862 | yghT | 0.170532692  | 0.769017271 |
| ecb_00231 | prfH | 0.181777882  | 0.771677934 |
| ecb_00537 | pheP | -0.204090327 | 0.771677934 |
| ecb_02062 | bglX | -0.170417587 | 0.771843769 |
| ecb_01878 | uvrC | 0.131484942  | 0.771991039 |
| ecb_00492 | renD | -0.442099983 | 0.771991039 |
| ecb_02261 | yfcS | 0.11721022   | 0.772333048 |
| ecb_01479 | yneF | -0.195078141 | 0.775169039 |



|           |      |              |             |
|-----------|------|--------------|-------------|
| ecb_03916 | dinF | 0.133446961  | 0.775169039 |
| ecb_00754 | ybhM | -0.21233372  | 0.775169039 |
| ecb_03350 | arsR | -0.116553184 | 0.776018847 |
| ecb_01203 | narY | 0.161630517  | 0.77607478  |
| ecb_03598 | purP | 0.118552422  | 0.776248314 |
| ecb_02402 | yfgJ | -0.150053045 | 0.776248314 |
| ecb_03614 | glmU | 0.204595403  | 0.776248314 |
| ecb_03040 | secG | -0.289267232 | 0.776249661 |
| ecb_02665 | amiC | -0.114859604 | 0.776249661 |
| ecb_03590 | mnmE | -0.239927556 | 0.776249661 |
| ecb_01247 | yciK | 0.107899456  | 0.776907864 |
| ecb_02748 | scpA | 0.17673961   | 0.776907864 |
| ecb_04019 | ecnB | -0.120326159 | 0.776907864 |
| ecb_03475 | kbl  | 0.177318594  | 0.776907864 |
| ecb_02953 | rlmG | 0.203568282  | 0.776907864 |
| ecb_02950 | fadH | -0.171580223 | 0.776989898 |
| ecb_03337 | yhil | -0.154772712 | 0.776989898 |
| ecb_00666 | ybfD | 0.240692056  | 0.776989898 |
| ecb_02281 | yfdE | 0.186412745  | 0.776989898 |
| ecb_03464 | trmL | -0.117522926 | 0.776989898 |
| ecb_00184 | ldcC | 0.183175009  | 0.776989898 |
| ecb_03855 | coaA | 0.117247972  | 0.776989898 |
| ecb_00359 | tsx  | 0.261587146  | 0.776989898 |
| ecb_02115 | rplY | -0.104997427 | 0.776989898 |
| ecb_01055 | solA | 0.121716788  | 0.776989898 |
| ecb_02750 | scpB | 0.147611408  | 0.776989898 |
| ecb_02971 | yqjG | 0.18370687   | 0.776989898 |
| ecb_00782 | opgE | -0.196604791 | 0.776989898 |
| ecb_03657 | gpp  | -0.09846397  | 0.776989898 |
| ecb_04109 | treR | 0.17214749   | 0.776989898 |
| ecb_00192 | yaeF | -0.144465951 | 0.776989898 |
| ecb_03769 | yihW | 0.129254655  | 0.776989898 |
| ecb_03456 | mtlR | 0.12176847   | 0.776989898 |
| ecb_01451 | gadB | -0.218756905 | 0.777254917 |
| ecb_00747 | ybhK | -0.144067869 | 0.777860143 |
| ecb_02998 | agaV | 0.145909782  | 0.777860143 |
| ecb_00203 | yafE | 0.157675419  | 0.779480242 |
| ecb_03675 | aslB | -0.204114094 | 0.779873325 |
| ecb_01392 | ydcN | 0.138364133  | 0.781798874 |
| ecb_00895 | lolA | -0.120721132 | 0.78222768  |
| ecb_02412 | yfhM | -0.122926667 | 0.782472948 |
| ecb_03102 | aaeX | 0.159346108  | 0.782472948 |
| ecb_01686 | rpmI | -0.139084184 | 0.784266975 |
| ecb_03125 | yhdV | 0.154709364  | 0.784266975 |
| ecb_02955 | ygjQ | 0.105790541  | 0.784679406 |
| ecb_02311 | ligA | 0.109370793  | 0.784912277 |
| ecb_00622 | glTJ | -0.129011042 | 0.786758451 |
| ecb_01855 | cheR | 0.125331261  | 0.786758451 |
| ecb_00077 | leuL | 0.292312633  | 0.787813884 |
| ecb_00308 | yaiL | 0.150966621  | 0.787855777 |

|           |      |              |             |
|-----------|------|--------------|-------------|
| ecb_01164 | dadA | -0.171652257 | 0.787855777 |
| ecb_02125 | ccmD | 0.136092446  | 0.788326728 |
| ecb_00641 | fldA | 0.132096114  | 0.792374804 |
| ecb_00434 | ybaQ | -0.121337155 | 0.792374804 |
| ecb_03681 | cyaA | 0.197015786  | 0.792374804 |
| ecb_03181 | gspl | 0.186946505  | 0.792374804 |
| ecb_00451 | ybbD | -0.206761339 | 0.792374804 |
| ecb_03760 | ompL | -0.24074622  | 0.79286848  |
| ecb_02503 | nadK | 0.116189174  | 0.794820151 |
| ecb_03759 | yihN | 0.152349819  | 0.794837586 |
| ecb_02425 | suhB | -0.149591765 | 0.796227173 |
| ecb_00092 | murC | -0.199513303 | 0.796227173 |
| ecb_03844 | argB | -0.156906445 | 0.796227173 |
| ecb_03118 | dusB | -0.148745794 | 0.796227173 |
| ecb_02639 | queF | -0.127305991 | 0.796227173 |
| ecb_04204 | yjiM | 0.130132611  | 0.796735899 |
| ecb_03869 | thiF | -0.119273356 | 0.796865601 |
| ecb_00536 | cusA | -0.26402829  | 0.798172355 |
| ecb_00713 | modF | -0.148665814 | 0.798172355 |
| ecb_01707 | chbB | -0.126116704 | 0.798172355 |
| ecb_00476 | cysS | -0.125654224 | 0.798319012 |
| ecb_01176 | dhaR | 0.120425985  | 0.798616408 |
| ecb_01102 | thiK | 0.097337235  | 0.798616408 |
| ecb_01017 | putA | 0.142276828  | 0.798616408 |
| ecb_04001 | yjdl | 0.13122103   | 0.799918519 |
| ecb_01222 | yciU | -0.132965024 | 0.799918519 |
| ecb_03374 | kdgK | 0.08797475   | 0.800584357 |
| ecb_03270 | malT | -0.206707279 | 0.800584357 |
| ecb_03626 | mioC | -0.11319125  | 0.800584357 |
| ecb_03602 | yieK | 0.14736613   | 0.800584357 |
| ecb_00084 | ftsL | -0.167450775 | 0.801398177 |
| ecb_01290 | ycjQ | 0.150008628  | 0.802562562 |
| ecb_03734 | ubiD | 0.097625652  | 0.803539734 |
| ecb_00642 | ybfE | 0.127596881  | 0.803539734 |
| ecb_02620 | ygcE | 0.126745956  | 0.803571402 |
| ecb_02337 | eutR | 0.251201326  | 0.803571402 |
| ecb_04130 | idnR | 0.100026624  | 0.803571402 |
| ecb_02570 | hycF | 0.122343356  | 0.803571402 |
| ecb_02583 | mutS | 0.167499365  | 0.80412665  |
| ecb_01315 | abgA | 0.148544071  | 0.80412665  |
| ecb_03488 | waaG | 0.107586473  | 0.80412665  |
| ecb_02574 | hycB | 0.208907979  | 0.804403829 |
| ecb_04124 | valS | -0.148758907 | 0.804403829 |
| ecb_01043 | clsC | -0.105881753 | 0.804477173 |
| ecb_02672 | ygdB | 0.102704866  | 0.806567421 |
| ecb_00552 | ybdZ | -0.197352387 | 0.806895791 |
| ecb_04133 | idnD | 0.119863384  | 0.806895791 |
| ecb_01352 | ldhA | 0.129699259  | 0.806895791 |
| ecb_02754 | argO | 0.171850718  | 0.806895791 |
| ecb_04138 | yjgX | -0.174061073 | 0.806895791 |

|           |      |              |             |
|-----------|------|--------------|-------------|
| ecb_03572 | yidR | 0.137335403  | 0.806895791 |
| ecb_02616 | ygcS | 0.194838464  | 0.806895791 |
| ecb_01652 | sufB | -0.113882839 | 0.806895791 |
| ecb_01618 | ydhL | 0.152457917  | 0.807539516 |
| ecb_01722 | ynjA | -0.109262364 | 0.808235666 |
| ecb_03182 | gspJ | 0.158357192  | 0.80957149  |
| ecb_02194 | elaA | 0.095861879  | 0.80957149  |
| ecb_02599 | ygbE | 0.175231288  | 0.80957149  |
| ecb_02516 | lhgO | -0.131998873 | 0.80957149  |
| ecb_01660 | ydiN | 0.141854479  | 0.80957149  |
| ecb_02587 | ygbK | 0.108579594  | 0.80957149  |
| ecb_02751 | scpC | 0.134313978  | 0.80957149  |
| ecb_01275 | puuD | -0.192722077 | 0.80957149  |
| ecb_00649 | speF | -0.105208691 | 0.80957149  |
| ecb_03136 | smf  | 0.123289297  | 0.80957149  |
| ecb_02101 | yeiP | 0.121848029  | 0.80957149  |
| ecb_01955 | cpsB | 0.131629884  | 0.809691487 |
| ecb_02295 | ypdF | 0.10470268   | 0.809761624 |
| ecb_02633 | gudX | 0.118729999  | 0.80990533  |
| ecb_00594 | crcB | 0.152741537  | 0.80990533  |
| ecb_02782 | yggT | 0.144379234  | 0.810103889 |
| ecb_00746 | uvrB | 0.094317319  | 0.810103889 |
| ecb_03280 | glgP | 0.105508857  | 0.810103889 |
| ecb_03559 | yidG | -0.114667464 | 0.810103889 |
| ecb_00180 | lpxB | -0.109342016 | 0.810103889 |
| ecb_03725 | rmuC | -0.143748935 | 0.810103889 |
| ecb_02461 | rnc  | 0.094656982  | 0.810103889 |
| ecb_01780 | yoaC | -0.104835835 | 0.810268327 |
| ecb_02157 | gyrA | -0.148052399 | 0.810268327 |
| ecb_02786 | yggM | 0.114109391  | 0.810268327 |
| ecb_01614 | ydhJ | -0.150903115 | 0.810268327 |
| ecb_02703 | ygeW | 0.128200083  | 0.810268327 |
| ecb_03615 | atpC | 0.126441798  | 0.810268327 |
| ecb_03142 | arfA | -0.146216323 | 0.810268327 |
| ecb_03143 | zntR | -0.141959771 | 0.810268327 |
| ecb_03037 | rimP | -0.111045477 | 0.810268327 |
| ecb_02331 | yfeX | -0.12596402  | 0.810268327 |
| ecb_03230 | yhfU | 0.089059365  | 0.810268327 |
| ecb_01602 | rsxE | -0.153343581 | 0.810268327 |
| ecb_01441 | ddpF | -0.181510087 | 0.810268327 |
| ecb_03476 | rfaD | 0.085221404  | 0.810268327 |
| ecb_02219 | yfbU | 0.100434388  | 0.810611021 |
| ecb_02183 | arnT | 0.100185351  | 0.810825408 |
| ecb_01741 | ydjH | -0.15675174  | 0.810825408 |
| ecb_00268 | betB | -0.100831827 | 0.810860645 |
| ecb_03779 | fdoG | 0.190507394  | 0.81114514  |
| ecb_04016 | epmB | 0.13288181   | 0.811385537 |
| ecb_01775 | fadD | -0.16074125  | 0.811863968 |
| ecb_01041 | ymdA | -0.164658297 | 0.812940589 |
| ecb_01865 | otsA | -0.083061603 | 0.812940589 |

|           |      |              |             |
|-----------|------|--------------|-------------|
| ecb_02714 | xdhD | 0.140261451  | 0.814543879 |
| ecb_01708 | osmE | -0.210987941 | 0.814558293 |
| ecb_03938 | yjcF | -0.211210935 | 0.814558293 |
| ecb_01635 | ydhQ | 0.123546972  | 0.814558293 |
| ecb_03569 | ibpB | 0.116128563  | 0.814558293 |
| ecb_03271 | rtcA | 0.1057845    | 0.814558293 |
| ecb_03707 | metR | 0.146492817  | 0.814558293 |
| ecb_02411 | pbpC | -0.118516378 | 0.814558293 |
| ecb_00410 | maa  | 0.140108933  | 0.817225739 |
| ecb_00280 | yahK | -0.120167989 | 0.817225739 |
| ecb_01060 | grxB | 0.108158704  | 0.817225739 |
| ecb_00330 | phoA | 0.095602474  | 0.817225739 |
| ecb_03820 | priA | 0.141541247  | 0.817225739 |
| ecb_00052 | folA | 0.097096691  | 0.817225739 |
| ecb_03810 | glpX | 0.153492501  | 0.817225739 |
| ecb_03800 | fieF | -0.117057028 | 0.817225739 |
| ecb_02913 | ribB | -0.111310466 | 0.817225739 |
| ecb_02577 | hypB | 0.112988634  | 0.817225739 |
| ecb_02317 | crr  | -0.132931497 | 0.817225739 |
| ecb_02632 | gudD | 0.111522601  | 0.817225739 |
| ecb_02883 | yqhC | 0.126138127  | 0.817225739 |
| ecb_02410 | ndk  | 0.216616269  | 0.817225739 |
| ecb_03753 | glnG | -0.211630333 | 0.817225739 |
| ecb_02427 | csiE | 0.117953552  | 0.817225739 |
| ecb_04061 | ulaB | 0.119390862  | 0.817225739 |
| ecb_01595 | cnu  | -0.154866841 | 0.817225739 |
| ecb_01790 | yobD | 0.169614357  | 0.817225739 |
| ecb_03247 | hofM | 0.102527577  | 0.817225739 |
| ecb_00002 | thrA | 0.113327971  | 0.817225739 |
| ecb_02061 | osmF | 0.119948265  | 0.81759798  |
| ecb_02631 | barA | 0.133623313  | 0.81759798  |
| ecb_03030 | npl  | -0.09673692  | 0.81759798  |
| ecb_02908 | ygiA | 0.124323896  | 0.81759798  |
| ecb_03410 | glyS | 0.087816622  | 0.818367104 |
| ecb_03197 | yheO | 0.130694872  | 0.819058836 |
| ecb_00207 | rnhA | -0.127583678 | 0.819822938 |
| ecb_00357 | secF | -0.129445066 | 0.820590305 |
| ecb_01114 | lolE | -0.137124715 | 0.821476097 |
| ecb_00235 | crl  | -0.142453608 | 0.821476097 |
| ecb_02809 | yeeW | -0.167998056 | 0.822437658 |
| ecb_01327 | recE | -0.11464598  | 0.822630319 |
| ecb_00072 | setA | 0.095732457  | 0.82298844  |
| ecb_00958 | fabA | -0.184071323 | 0.82298844  |
| ecb_02420 | iscA | -0.087587246 | 0.82298844  |
| ecb_01781 | yoaH | -0.139002791 | 0.823455144 |
| ecb_02230 | yfcl | -0.145538376 | 0.823701725 |
| ecb_00438 | cueR | -0.088270499 | 0.824131282 |
| ecb_02923 | glnE | 0.125019878  | 0.824331299 |
| ecb_02756 | fbaA | 0.079855453  | 0.824331299 |
| ecb_01143 | ycgG | -0.145630984 | 0.824331299 |

|           |      |              |             |
|-----------|------|--------------|-------------|
| ecb_02914 | yqiC | 0.154842714  | 0.824331299 |
| ecb_01007 | wrbA | -0.248069734 | 0.824780977 |
| ecb_00898 | dmsA | 0.131714687  | 0.824827683 |
| ecb_00118 | yacL | -0.143555481 | 0.825371655 |
| ecb_00783 | yliL | -0.271888255 | 0.825371655 |
| ecb_04056 | bsmA | -0.239491114 | 0.825371655 |
| ecb_01113 | lolD | -0.127970672 | 0.825371655 |
| ecb_01670 | fadK | 0.11006834   | 0.825371655 |
| ecb_01800 | htpX | 0.131633872  | 0.825371655 |
| ecb_01610 | anmK | -0.131918018 | 0.825371655 |
| ecb_03652 | ilvC | 0.204369721  | 0.826463697 |
| ecb_00371 | thiI | -0.089441342 | 0.826778866 |
| ecb_01212 | galU | -0.152022514 | 0.826778866 |
| ecb_03491 | coaD | 0.169127633  | 0.826778866 |
| ecb_01155 | ycgM | -0.126920058 | 0.827007849 |
| ecb_00593 | cspE | 0.156452952  | 0.827007849 |
| ecb_01340 | ynaK | -0.133092322 | 0.827007849 |
| ecb_00075 | leuB | 0.204878982  | 0.827486725 |
| ecb_03043 | ftsH | 0.122574578  | 0.827645959 |
| ecb_02116 | yejK | 0.191947301  | 0.827645959 |
| ecb_02592 | nlpD | -0.102071521 | 0.827974719 |
| ecb_00372 | yajL | -0.304193567 | 0.829756386 |
| ecb_02569 | hycG | 0.114005808  | 0.829756386 |
| ecb_03232 | yhfW | 0.105741177  | 0.829982165 |
| ecb_01085 | rpmF | -0.119305182 | 0.832045911 |
| ecb_00234 | frsA | 0.093957265  | 0.832045911 |
| ecb_00940 | ssuA | -0.178346115 | 0.833278059 |
| ecb_03604 | bgIH | 0.182359442  | 0.833278059 |
| ecb_03135 | smg  | -0.108485502 | 0.833278059 |
| ecb_01899 | erfK | -0.12279541  | 0.833956149 |
| ecb_02385 | yfgO | -0.127917359 | 0.833956149 |
| ecb_01827 | mepM | 0.091014988  | 0.833956149 |
| ecb_04262 | lplA | 0.084782417  | 0.833956149 |
| ecb_00796 | gsiA | 0.124042923  | 0.834276456 |
| ecb_02994 | prlF | -0.097791989 | 0.834276456 |
| ecb_02688 | ygeA | 0.108851344  | 0.834276456 |
| ecb_03637 | rbsB | 0.122314172  | 0.835099068 |
| ecb_00466 | allC | -0.121121906 | 0.835944608 |
| ecb_01774 | rnd  | -0.13462334  | 0.835944608 |
| ecb_02701 | xdhC | 0.109674391  | 0.835944608 |
| ecb_00918 | msbA | 0.124139756  | 0.835944608 |
| ecb_01616 | sodC | 0.083311119  | 0.835944608 |
| ecb_01502 | ydfJ | 0.129689868  | 0.835944608 |
| ecb_03011 | yraJ | 0.100561778  | 0.835944608 |
| ecb_01735 | sppA | 0.146511407  | 0.835944608 |
| ecb_02680 | ygdQ | -0.118622817 | 0.836171075 |
| ecb_01734 | ydjA | 0.074538438  | 0.836405965 |
| ecb_00113 | aceE | 0.091964159  | 0.836405965 |
| ecb_03678 | hemX | 0.095123869  | 0.837050011 |
| ecb_02243 | truA | 0.160341784  | 0.837050011 |

|           |      |              |             |
|-----------|------|--------------|-------------|
| ecb_01912 | sbmC | -0.099643551 | 0.837050011 |
| ecb_02864 | gss  | 0.092921674  | 0.837050011 |
| ecb_01211 | rssB | -0.127163898 | 0.837050011 |
| ecb_01107 | comR | 0.119147559  | 0.83717462  |
| ecb_03883 | purH | 0.199198538  | 0.83717462  |
| ecb_02771 | yqgD | 0.191047676  | 0.837179941 |
| ecb_02232 | hisM | -0.141509877 | 0.83720566  |
| ecb_02562 | hypF | 0.133479031  | 0.837419653 |
| ecb_03743 | mobA | -0.145583554 | 0.837605671 |
| ecb_02671 | ppdC | 0.099795228  | 0.837605671 |
| ecb_02173 | yfaW | 0.108784425  | 0.838232174 |
| ecb_02564 | ascG | 0.121003351  | 0.838746095 |
| ecb_00657 | ybfA | 0.170728572  | 0.839708761 |
| ecb_03552 | uhpB | -0.0914776   | 0.839828437 |
| ecb_01894 | amn  | -0.088817328 | 0.839928504 |
| ecb_04236 | opgB | 0.139652831  | 0.841166163 |
| ecb_04213 | symE | -0.123580213 | 0.841211848 |
| ecb_02515 | csiD | -0.12484581  | 0.841211848 |
| ecb_03097 | argR | 0.107501134  | 0.841211848 |
| ecb_01460 | ydeQ | 0.204734782  | 0.841211848 |
| ecb_03659 | trxA | -0.073399192 | 0.841211848 |
| ecb_01248 | sohB | 0.094302381  | 0.841550576 |
| ecb_00985 | etp  | 0.080091031  | 0.841550576 |
| ecb_03696 | yigF | -0.160493936 | 0.841550576 |
| ecb_00777 | glnP | 0.107950461  | 0.841578672 |
| ecb_01166 | cvrA | 0.12673044   | 0.841792543 |
| ecb_00459 | glxR | 0.126168366  | 0.841954442 |
| ecb_02579 | hypD | 0.100984562  | 0.841954442 |
| ecb_01777 | tsaB | 0.092706501  | 0.842102137 |
| ecb_01456 | ydeN | 0.145052274  | 0.842788324 |
| ecb_01378 | trg  | -0.168682089 | 0.843004032 |
| ecb_00276 | yahF | 0.124898378  | 0.843239349 |
| ecb_00122 | cueO | 0.292966635  | 0.843569536 |
| ecb_03050 | rpmA | -0.122044534 | 0.843569536 |
| ecb_02196 | elaD | -0.096093994 | 0.843569536 |
| ecb_03988 | adiA | 0.133734743  | 0.84609497  |
| ecb_02580 | hypE | 0.148607087  | 0.846652732 |
| ecb_03948 | nrfG | 0.431405419  | 0.848679388 |
| ecb_02808 | cbtA | 0.210808074  | 0.848679388 |
| ecb_03234 | yhfY | 0.114681147  | 0.848960106 |
| ecb_00810 | ybjH | -0.107812091 | 0.848960106 |
| ecb_03095 | degS | -0.104805001 | 0.849174665 |
| ecb_02454 | yfhB | -0.119561459 | 0.849174665 |
| ecb_00774 | rlmF | -0.115112349 | 0.849885448 |
| ecb_01010 | rutF | -0.098459798 | 0.849885448 |
| ecb_02459 | recO | 0.094724211  | 0.84997053  |
| ecb_00003 | thrB | 0.096821225  | 0.850634888 |
| ecb_03670 | wzxE | 0.150628541  | 0.850634888 |
| ecb_02974 | yhaJ | 0.096795731  | 0.850807549 |
| ecb_00767 | ybiB | -0.136245692 | 0.850807549 |

|           |      |              |             |
|-----------|------|--------------|-------------|
| ecb_01192 | ldrB | -0.14141817  | 0.851384411 |
| ecb_02213 | nuoA | -0.082318464 | 0.851605446 |
| ecb_02666 | argA | 0.139269659  | 0.852395456 |
| ecb_04255 | yjjW | 0.150462062  | 0.852395456 |
| ecb_00945 | elfG | -0.087453295 | 0.852395456 |
| ecb_03397 | yhjX | 0.133401432  | 0.852395456 |
| ecb_02626 | mazG | -0.11170024  | 0.852395456 |
| ecb_00873 | ybjS | 0.139632047  | 0.852395456 |
| ecb_00793 | moeB | -0.210991581 | 0.852395456 |
| ecb_01177 | ycgV | 0.098787106  | 0.852395456 |
| ecb_02716 | guaD | 0.153874726  | 0.852395456 |
| ecb_03007 | agaD | 0.100914555  | 0.852395456 |
| ecb_03274 | glpR | 0.073244403  | 0.852395456 |
| ecb_00284 | yahO | -0.170463271 | 0.852395456 |
| ecb_00239 | proB | 0.14615055   | 0.852395456 |
| ecb_03316 | yhhM | -0.079968052 | 0.852395456 |
| ecb_01826 | lpxM | 0.09160886   | 0.852395456 |
| ecb_00811 | ybjI | -0.094023206 | 0.852395456 |
| ecb_03175 | gspC | 0.185147716  | 0.852395456 |
| ecb_01555 | ynfD | -0.126375964 | 0.852395456 |
| ecb_03341 | yhiN | -0.088486532 | 0.852395456 |
| ecb_00910 | ycaP | -0.112358741 | 0.852395456 |
| ecb_00956 | ymbA | -0.102109844 | 0.852395456 |
| ecb_01162 | fadR | 0.13825216   | 0.852395456 |
| ecb_01655 | menI | 0.155296836  | 0.852395456 |
| ecb_03549 | adeD | 0.095566027  | 0.852767995 |
| ecb_01653 | sufA | -0.11357327  | 0.852767995 |
| ecb_00473 | purE | -0.095371184 | 0.853022681 |
| ecb_03667 | rffH | 0.11777318   | 0.853022681 |
| ecb_01918 | yeeY | -0.098521315 | 0.853022681 |
| ecb_03184 | gspL | 0.175617207  | 0.853022681 |
| ecb_02959 | ygjV | 0.109038795  | 0.853022681 |
| ecb_02052 | yehR | -0.109575757 | 0.853022681 |
| ecb_01598 | rsxB | -0.122085307 | 0.853132128 |
| ecb_01750 | yeaE | -0.090063155 | 0.85328138  |
| ecb_03775 | yiiF | -0.111862968 | 0.85328138  |
| ecb_04117 | bdcR | 0.118347879  | 0.85328138  |
| ecb_03245 | hofO | 0.105073462  | 0.85328138  |
| ecb_00360 | yajI | 0.118250877  | 0.85328138  |
| ecb_03496 | dfp  | 0.108196924  | 0.85389465  |
| ecb_02369 | bamC | -0.105814261 | 0.85389465  |
| ecb_01087 | fabH | 0.100996914  | 0.855822133 |
| ecb_00345 | sbcC | 0.115637247  | 0.855822133 |
| ecb_02581 | fhlA | -0.108437729 | 0.855822133 |
| ecb_02252 | yfcA | 0.162944925  | 0.855822133 |
| ecb_02379 | hyfG | 0.103600265  | 0.855822133 |
| ecb_03833 | ptsA | 0.102383905  | 0.855822133 |
| ecb_04066 | yjfY | 0.109515563  | 0.855954812 |
| ecb_03036 | nusA | -0.091584465 | 0.857903427 |
| ecb_00083 | rsmH | -0.130737316 | 0.858814559 |

|           |      |              |             |
|-----------|------|--------------|-------------|
| ecb_02980 | tdcF | 0.107128295  | 0.859388149 |
| ecb_03114 | accC | 0.086996982  | 0.860128534 |
| ecb_04156 | fecB | -0.117331456 | 0.860128534 |
| ecb_01383 | ydcH | -0.157776958 | 0.860128534 |
| ecb_01492 | eamA | -0.115863059 | 0.861026266 |
| ecb_00982 | appB | 0.069143508  | 0.861053878 |
| ecb_01693 | ydiZ | 0.144818586  | 0.861357998 |
| ecb_03252 | hslR | 0.095297526  | 0.861357998 |
| ecb_01497 | dcp  | 0.163769937  | 0.861357998 |
| ecb_02396 | yfgG | -0.122746864 | 0.861671223 |
| ecb_01272 | ymjA | -0.103402352 | 0.861671223 |
| ecb_03766 | yihT | 0.167589558  | 0.861677205 |
| ecb_02984 | tdcB | 0.124321268  | 0.861677205 |
| ecb_04152 | yjhV | -0.140383115 | 0.863569859 |
| ecb_03893 | pepE | -0.098539982 | 0.863569859 |
| ecb_00617 | rihA | 0.170706668  | 0.863569859 |
| ecb_02576 | hypA | 0.12427438   | 0.863569859 |
| ecb_01970 | asmA | -0.095035421 | 0.863732629 |
| ecb_01651 | sufC | -0.105328492 | 0.863732629 |
| ecb_01338 | rzpR | 0.137943703  | 0.863732629 |
| ecb_03189 | chiA | -0.093633681 | 0.863732629 |
| ecb_03922 | pspG | -0.142058331 | 0.863732629 |
| ecb_02968 | yqjE | 0.156528551  | 0.863732629 |
| ecb_03381 | bcsA | -0.099928235 | 0.863732629 |
| ecb_02387 | yfgD | -0.108277767 | 0.863732629 |
| ecb_00675 | abrB | 0.17653201   | 0.864041351 |
| ecb_02288 | lpxP | -0.112059286 | 0.864041351 |
| ecb_03229 | yhfT | 0.073293144  | 0.864481268 |
| ecb_04025 | frdB | 0.095181179  | 0.864481268 |
| ecb_01712 | spy  | -0.071278044 | 0.864481268 |
| ecb_01431 | yddG | -0.15909849  | 0.864481268 |
| ecb_03658 | rhlB | -0.075646924 | 0.864481268 |
| ecb_03002 | agaA | 0.105006713  | 0.864481268 |
| ecb_00260 | rclA | 0.099071545  | 0.864481268 |
| ecb_00347 | phoB | -0.072970496 | 0.864847002 |
| ecb_03503 | yicG | 0.173092676  | 0.864979617 |
| ecb_01749 | yeaD | 0.103482443  | 0.865567726 |
| ecb_00141 | folK | 0.115890456  | 0.866180003 |
| ecb_03430 | yiaN | 0.140128542  | 0.866180003 |
| ecb_03382 | yhjQ | -0.101084308 | 0.866464486 |
| ecb_02376 | hyfD | 0.099468165  | 0.867895483 |
| ecb_01273 | puuP | -0.113838501 | 0.867895483 |
| ecb_00592 | pagP | -0.115761312 | 0.867895483 |
| ecb_01427 | narK | 0.095080849  | 0.867895483 |
| ecb_00138 | htrE | 0.118434735  | 0.867895483 |
| ecb_01636 | ydhR | -0.099238779 | 0.867914408 |
| ecb_02104 | lpxT | 0.105292815  | 0.867914408 |
| ecb_02594 | umpG | 0.118695865  | 0.868595022 |
| ecb_03672 | wzyE | 0.119592563  | 0.868595022 |
| ecb_02165 | glpQ | 0.137448486  | 0.87000612  |



|           |      |              |             |
|-----------|------|--------------|-------------|
| ecb_01149 | minE | -0.128093518 | 0.871031472 |
| ecb_03077 | gltB | 0.180623957  | 0.871296227 |
| ecb_02086 | yeiE | -0.133285964 | 0.871296227 |
| ecb_02193 | elaB | -0.154154847 | 0.871296227 |
| ecb_03865 | yjaZ | -0.106691903 | 0.871368123 |
| ecb_01198 | ychO | -0.085584213 | 0.871867189 |
| ecb_04107 | treC | 0.1791032    | 0.871867189 |
| ecb_00630 | ubiF | -0.157171855 | 0.871867189 |
| ecb_02982 | tdcD | 0.116408636  | 0.871867189 |
| ecb_03756 | typA | -0.103219159 | 0.871867189 |
| ecb_03811 | glpK | 0.25214351   | 0.871867189 |
| ecb_03643 | yifE | 0.173592433  | 0.871867189 |
| ecb_01603 | nth  | -0.087666784 | 0.871867189 |
| ecb_00125 | can  | 0.103287796  | 0.871867189 |
| ecb_04139 | yjgZ | 0.093630781  | 0.871867189 |
| ecb_03504 | ligB | -0.106486658 | 0.871867189 |
| ecb_00089 | murD | -0.177125533 | 0.871867189 |
| ecb_01470 | hipB | 0.102401535  | 0.871867189 |
| ecb_00106 | hofB | 0.150009079  | 0.871867189 |
| ecb_02380 | hyfH | 0.094254257  | 0.871948574 |
| ecb_01825 | pykA | -0.098540127 | 0.871948574 |
| ecb_01318 | ydaM | -0.129498042 | 0.871948574 |
| ecb_03372 | yhjG | 0.130145775  | 0.871948574 |
| ecb_03661 | rho  | 0.16922964   | 0.871948574 |
| ecb_01455 | ydeM | 0.152614184  | 0.872137874 |
| ecb_02118 | yejM | -0.093473337 | 0.872137874 |
| ecb_01368 | hrpA | 0.131825383  | 0.872137874 |
| ecb_01965 | wcaA | 0.109043142  | 0.872460265 |
| ecb_00670 | ybgl | 0.071004108  | 0.872460265 |
| ecb_03890 | iclR | -0.106668047 | 0.872460265 |
| ecb_00870 | ybjP | 0.081258448  | 0.872460265 |
| ecb_00638 | chiP | -0.206936831 | 0.872460265 |
| ecb_01302 | ycjG | -0.143253531 | 0.872460265 |
| ecb_00883 | macA | 0.112057481  | 0.873424608 |
| ecb_00109 | ampD | -0.072427163 | 0.873424608 |
| ecb_03877 | hupA | -0.104553723 | 0.873424608 |
| ecb_01480 | yneG | -0.098664269 | 0.873424608 |
| ecb_00534 | cusF | -0.379272736 | 0.873424608 |
| ecb_00636 | nagE | 0.20529854   | 0.873974763 |
| ecb_04026 | frdA | 0.077380507  | 0.873974763 |
| ecb_00890 | cydC | 0.202370044  | 0.873974763 |
| ecb_03033 | truB | 0.098164608  | 0.873974763 |
| ecb_02258 | yfcP | 0.099920289  | 0.873974763 |
| ecb_03642 | hdfR | -0.115590486 | 0.873974763 |
| ecb_03995 | dcuR | 0.112565216  | 0.873974763 |
| ecb_03934 | soxS | -0.160312079 | 0.873974763 |
| ecb_01416 | yncl | -0.187137156 | 0.873974763 |
| ecb_03630 | ravA | 0.127326821  | 0.873974763 |
| ecb_02610 | queD | 0.07209355   | 0.873974763 |
| ecb_03622 | atpB | 0.111645203  | 0.8742919   |

|           |      |              |             |
|-----------|------|--------------|-------------|
| ecb_03071 | npr  | -0.14761514  | 0.874921312 |
| ecb_00381 | cyoC | 0.077411577  | 0.874921312 |
| ecb_03426 | yiaJ | -0.080550105 | 0.874921312 |
| ecb_00714 | modE | -0.085172771 | 0.876902938 |
| ecb_03042 | folP | 0.08902831   | 0.878047245 |
| ecb_03957 | alsE | 0.114957811  | 0.878047245 |
| ecb_03179 | gspG | 0.184454416  | 0.878047245 |
| ecb_03336 | rbbA | 0.113919272  | 0.878047245 |
| ecb_02785 | yggW | 0.118963671  | 0.878424458 |
| ecb_02234 | hisJ | -0.075325364 | 0.878424458 |
| ecb_03212 | fic  | 0.084442416  | 0.878424458 |
| ecb_04251 | osmY | -0.087807036 | 0.878424458 |
| ecb_02469 | yfiC | 0.086822298  | 0.878424458 |
| ecb_03809 | fpr  | 0.129562898  | 0.878424458 |
| ecb_02432 | hcaC | -0.077112911 | 0.878424458 |
| ecb_00460 | ybbV | -0.321209448 | 0.878424458 |
| ecb_00216 | fadE | -0.167784247 | 0.878424458 |
| ecb_03311 | ftsX | -0.137339827 | 0.878424458 |
| ecb_02149 | atoA | 0.100944894  | 0.878424458 |
| ecb_03597 | yieF | -0.127233457 | 0.878424458 |
| ecb_01902 | cobU | -0.106762796 | 0.878424458 |
| ecb_03074 | elbB | 0.08128603   | 0.878424458 |
| ecb_04086 | cysQ | 0.121059364  | 0.878424458 |
| ecb_02600 | cysC | 0.205830668  | 0.878424458 |
| ecb_02174 | yfaX | 0.108560563  | 0.878424458 |
| ecb_00005 | yaaX | -0.107730979 | 0.878424458 |
| ecb_03751 | yihI | -0.11282633  | 0.879404012 |
| ecb_00043 | caiA | 0.070596846  | 0.879557817 |
| ecb_00475 | ppiB | 0.075190917  | 0.880525054 |
| ecb_03004 | kbaY | 0.119340106  | 0.880759034 |
| ecb_03664 | rffE | 0.101119614  | 0.88087856  |
| ecb_00019 | nhaR | -0.093517777 | 0.881648695 |
| ecb_03276 | glpE | 0.089410629  | 0.882438434 |
| ecb_01059 | yceB | -0.082440108 | 0.882438434 |
| ecb_03796 | yiiM | -0.069458737 | 0.882438434 |
| ecb_01405 | mnaT | -0.104435547 | 0.882438434 |
| ecb_00520 | envY | 0.094892525  | 0.883303382 |
| ecb_02830 | yghE | -0.081787416 | 0.883303382 |
| ecb_00229 | yafP | 0.130000602  | 0.883303382 |
| ecb_03213 | yhfG | 0.105490652  | 0.883303382 |
| ecb_00395 | fadM | -0.14789292  | 0.883303382 |
| ecb_03076 | yhcC | 0.091824614  | 0.883303382 |
| ecb_00706 | ybgS | 0.095027017  | 0.883303382 |
| ecb_03728 | ubiB | 0.072620693  | 0.883303382 |
| ecb_03022 | yhbQ | -0.12311322  | 0.883303382 |
| ecb_01099 | hinT | 0.118045987  | 0.883303382 |
| ecb_00110 | ampE | -0.103073002 | 0.884314045 |
| ecb_02209 | nuoF | -0.17862514  | 0.884385141 |
| ecb_00559 | fepB | -0.103558925 | 0.884520969 |
| ecb_02435 | yphA | -0.106998903 | 0.884520969 |

|           |      |              |             |
|-----------|------|--------------|-------------|
| ecb_01366 | ynbD | 0.090142588  | 0.884520969 |
| ecb_02168 | glpB | 0.080033847  | 0.884520969 |
| ecb_00852 | ybjL | -0.0930496   | 0.884520969 |
| ecb_01623 | lhr  | -0.095575773 | 0.884520969 |
| ecb_02251 | epmC | -0.138609498 | 0.884520969 |
| ecb_02508 | smpB | 0.139500225  | 0.884520969 |
| ecb_01193 | ldrC | -0.126786994 | 0.884520969 |
| ecb_02381 | hyfl | 0.104461516  | 0.884520969 |
| ecb_00748 | moaA | -0.096170511 | 0.884520969 |
| ecb_01853 | cheY | 0.074761207  | 0.884520969 |
| ecb_04188 | fimG | 0.098048664  | 0.884520969 |
| ecb_02366 | tmcA | 0.111284778  | 0.884520969 |
| ecb_03621 | atpE | 0.090907187  | 0.884520969 |
| ecb_03917 | yjbj | -0.104169477 | 0.884520969 |
| ecb_03836 | pflD | 0.085942844  | 0.884520969 |
| ecb_04033 | queG | 0.131441301  | 0.884520969 |
| ecb_00348 | phoR | 0.083357206  | 0.884520969 |
| ecb_04243 | bgIJ | -0.133793535 | 0.884520969 |
| ecb_02368 | purC | -0.139481512 | 0.884520969 |
| ecb_04212 | mcrB | -0.093650958 | 0.884520969 |
| ecb_00884 | macB | -0.096080638 | 0.884520969 |
| ecb_02400 | guaB | -0.106488677 | 0.884520969 |
| ecb_04027 | epmA | 0.09449608   | 0.884520969 |
| ecb_02330 | yfeW | 0.107026546  | 0.884520969 |
| ecb_03649 | ilvD | -0.224664022 | 0.885510783 |
| ecb_03343 | uspB | -0.077460806 | 0.886076054 |
| ecb_00631 | asnB | 0.118183006  | 0.886751802 |
| ecb_01125 | pepT | -0.094682113 | 0.887035972 |
| ecb_03852 | murI | -0.077451228 | 0.887207506 |
| ecb_03673 | rffM | 0.091048891  | 0.887372385 |
| ecb_00542 | ybdK | 0.122840905  | 0.887372385 |
| ecb_01178 | yehF | 0.095740851  | 0.887372385 |
| ecb_00042 | caiB | -0.18899001  | 0.887372385 |
| ecb_03903 |      | 0.109644974  | 0.887372385 |
| ecb_00602 | rlpA | -0.071303072 | 0.887372385 |
| ecb_02341 | eutB | 0.079999193  | 0.887372385 |
| ecb_03972 | phnH | 0.109328188  | 0.887372385 |
| ecb_01557 | ynfF | 0.149520388  | 0.887372385 |
| ecb_02169 | glpC | 0.130286039  | 0.887372385 |
| ecb_00256 | eaeH | 0.086096746  | 0.887372385 |
| ecb_00990 | gfcA | -0.279588369 | 0.887372385 |
| ecb_01147 | ymgG | 0.116630421  | 0.887372385 |
| ecb_02850 | yghO | 0.109804822  | 0.887372385 |
| ecb_00062 | polB | -0.107498999 | 0.887372385 |
| ecb_02364 | yphN | -0.13186221  | 0.887372385 |
| ecb_01591 | malY | -0.097015272 | 0.887372385 |
| ecb_02458 | pdxJ | 0.100947641  | 0.887439378 |
| ecb_00500 | rusA | 0.0824944    | 0.887439378 |
| ecb_03340 | yhiM | 0.101653194  | 0.888002294 |
| ecb_03882 | purD | 0.104387638  | 0.888398509 |

|           |      |              |             |
|-----------|------|--------------|-------------|
| ecb_01421 | nhoA | -0.08872633  | 0.889209568 |
| ecb_01264 | yciW | 0.173632783  | 0.889209568 |
| ecb_00028 | yaaY | -0.078440226 | 0.889933266 |
| ecb_01314 | abgB | 0.147730275  | 0.889933266 |
| ecb_00040 | caiD | 0.081492152  | 0.889933266 |
| ecb_01764 | yeaQ | -0.127418887 | 0.890192501 |
| ecb_01269 | sapC | 0.09422152   | 0.890192501 |
| ecb_03471 | envC | 0.096497615  | 0.890303384 |
| ecb_02993 | garD | 0.097793339  | 0.890303384 |
| ecb_01292 | ycjS | 0.088936209  | 0.89206224  |
| ecb_01185 | hemA | 0.118118038  | 0.89206224  |
| ecb_00740 | ybhB | 0.097529431  | 0.89206224  |
| ecb_02286 | ypdI | -0.140684783 | 0.89206224  |
| ecb_00465 | allE | 0.154058628  | 0.892558235 |
| ecb_02711 | ygfK | 0.08871637   | 0.892560943 |
| ecb_01848 | yecT | -0.141489771 | 0.892560943 |
| ecb_02323 | cysW | -0.11644448  | 0.892560943 |
| ecb_01743 | ydjJ | 0.091514485  | 0.892866764 |
| ecb_00607 | cobC | -0.089534795 | 0.892866764 |
| ecb_03324 | acpT | 0.10084346   | 0.892866764 |
| ecb_00868 | artI | 0.115927068  | 0.892866764 |
| ecb_03790 | rhaB | -0.120420744 | 0.892866764 |
| ecb_01097 | ptsG | 0.107343621  | 0.892866764 |
| ecb_02278 | emrK | 0.130116224  | 0.892866764 |
| ecb_00628 | ybeZ | 0.101526753  | 0.892866764 |
| ecb_02615 | ygcR | 0.093457973  | 0.893560396 |
| ecb_03783 | frvX | -0.102467027 | 0.894167604 |
| ecb_04184 | fimI | 0.120775089  | 0.894982561 |
| ecb_00722 | ybhH | 0.094024035  | 0.895184797 |
| ecb_00715 | acrZ | -0.170738909 | 0.895184797 |
| ecb_01508 | stfR | 0.142299192  | 0.895184797 |
| ecb_02573 | hycC | 0.084096526  | 0.895184797 |
| ecb_00091 | murG | -0.156151535 | 0.895184797 |
| ecb_01003 | cbpA | -0.072316894 | 0.895469968 |
| ecb_02255 | prmB | 0.175614562  | 0.895469968 |
| ecb_00625 | Int  | -0.168755834 | 0.895469968 |
| ecb_03298 | ugpQ | -0.104853214 | 0.896279185 |
| ecb_03010 | yral | 0.103415474  | 0.896279185 |
| ecb_01808 | yebW | -0.085738988 | 0.896279185 |
| ecb_02477 | yfiP | -0.066925146 | 0.896279185 |
| ecb_00481 | sfmC | 0.12275788   | 0.896279185 |
| ecb_03789 | rhaA | 0.13000557   | 0.896279185 |
| ecb_01683 | pheS | 0.084261094  | 0.896279185 |
| ecb_01560 | dmsD | -0.091188731 | 0.896279185 |
| ecb_02315 | ptsH | -0.077070039 | 0.896279185 |
| ecb_02170 | yfaD | -0.111372319 | 0.896279185 |
| ecb_01812 | yobA | -0.085053738 | 0.896279185 |
| ecb_01854 | cheB | 0.077273629  | 0.896279185 |
| ecb_03665 | rffD | 0.092129276  | 0.896279185 |
| ecb_03583 | recF | 0.109207782  | 0.896279185 |

|           |      |              |             |
|-----------|------|--------------|-------------|
| ecb_00179 | lpxA | -0.155819072 | 0.896279185 |
| ecb_01864 | uspC | -0.095668626 | 0.896279185 |
| ecb_02878 | yghA | 0.104880372  | 0.896279185 |
| ecb_01213 | hns  | -0.096097843 | 0.896316887 |
| ecb_03639 | rbsR | -0.120942319 | 0.896442553 |
| ecb_01765 | yoaG | 0.114817002  | 0.896442553 |
| ecb_01411 | yncG | -0.129154283 | 0.896442553 |
| ecb_02685 | galR | 0.0941783    | 0.897054406 |
| ecb_00354 | tgt  | 0.115394791  | 0.89748328  |
| ecb_03326 | nikB | 0.118677471  | 0.897936932 |
| ecb_01630 | ydhB | -0.092921656 | 0.899051172 |
| ecb_03052 | ispB | 0.07734471   | 0.899145497 |
| ecb_00004 | thrC | 0.071906754  | 0.900905747 |
| ecb_03194 | tusB | 0.144937927  | 0.900905747 |
| ecb_01728 | nudG | 0.085691716  | 0.901081693 |
| ecb_00497 | ybcN | 0.143360237  | 0.902456789 |
| ecb_02049 | yehM | -0.085188942 | 0.902466513 |
| ecb_00932 | aspC | 0.057651786  | 0.902466513 |
| ecb_02733 | bglA | -0.107923824 | 0.902466513 |
| ecb_01406 | curA | 0.079114671  | 0.903317548 |
| ecb_01820 | purT | 0.136336922  | 0.903317548 |
| ecb_04098 | ytfT | 0.096186979  | 0.903317548 |
| ecb_03055 | ibaG | 0.065507771  | 0.903317548 |
| ecb_03930 | uvrA | 0.104473709  | 0.903317548 |
| ecb_00445 | tesA | -0.061519018 | 0.903317548 |
| ecb_03329 | nikE | 0.1201582    | 0.903547269 |
| ecb_01407 | mcbR | -0.1154559   | 0.903547269 |
| ecb_02659 | gcvA | 0.090920668  | 0.903547269 |
| ecb_01205 | narI | 0.087258354  | 0.903547269 |
| ecb_02175 | yfaY | -0.065448383 | 0.903547269 |
| ecb_01260 | osmB | 0.098913473  | 0.903547269 |
| ecb_02059 | yehX | -0.097597987 | 0.903562559 |
| ecb_00261 | rclR | 0.107828753  | 0.903951121 |
| ecb_01785 | yoaD | 0.126734578  | 0.904073362 |
| ecb_00156 | yadS | -0.079731114 | 0.904871581 |
| ecb_04039 | hfq  | 0.064255812  | 0.904970714 |
| ecb_02297 | fryB | 0.074213137  | 0.905058041 |
| ecb_03839 | yijO | 0.06554345   | 0.905125019 |
| ecb_03330 | nikR | 0.126852342  | 0.905344256 |
| ecb_02030 | yegX | -0.099408122 | 0.905344256 |
| ecb_02537 | ygaZ | -0.074241869 | 0.905575384 |
| ecb_04097 | ytfR | 0.09842734   | 0.905575384 |
| ecb_03873 | nudC | 0.080629131  | 0.905575384 |
| ecb_04060 | ulaA | -0.066830311 | 0.905575384 |
| ecb_01792 | rlmA | -0.084056376 | 0.905575384 |
| ecb_01394 | yncJ | 0.099824098  | 0.905575384 |
| ecb_03831 | gldA | 0.090362885  | 0.905575384 |
| ecb_02336 | hemF | 0.08349391   | 0.905575384 |
| ecb_00798 | gsiC | -0.102724732 | 0.905575384 |
| ecb_03863 | rpoB | 0.064535257  | 0.905805979 |

|           |      |              |             |
|-----------|------|--------------|-------------|
| ecb_00857 | rimK | 0.085858842  | 0.906258605 |
| ecb_01685 | rpIT | -0.161710988 | 0.906258605 |
| ecb_03435 | sgbE | 0.107668638  | 0.906271713 |
| ecb_04087 | ytfJ | -0.086565989 | 0.906271713 |
| ecb_00603 | mrdB | -0.079127572 | 0.906271713 |
| ecb_03317 | yhhN | -0.086298659 | 0.906271713 |
| ecb_01158 | umuD | -0.084803154 | 0.906271713 |
| ecb_01763 | yeaP | -0.061406455 | 0.906271713 |
| ecb_01481 | yneH | -0.086925464 | 0.906271713 |
| ecb_04252 | ytjA | -0.089181653 | 0.906271713 |
| ecb_00655 | kdpA | 0.111206695  | 0.906271713 |
| ecb_00846 | yfdK | 0.116854487  | 0.906271713 |
| ecb_03618 | atpA | 0.08835864   | 0.906271713 |
| ecb_02628 | mazE | -0.090903806 | 0.906271713 |
| ecb_03473 | waaH | 0.080153894  | 0.907131768 |
| ecb_01052 | yceI | -0.084664028 | 0.907542594 |
| ecb_03458 | yibL | -0.181793337 | 0.907703008 |
| ecb_03312 | ftsE | -0.103652803 | 0.907703008 |
| ecb_03425 | ysaA | -0.089317393 | 0.907703008 |
| ecb_00086 | murE | -0.121820863 | 0.907984029 |
| ecb_03668 | rffC | 0.083766145  | 0.908359139 |
| ecb_02256 | smrB | 0.094701304  | 0.908437931 |
| ecb_03373 | yhjH | 0.084585257  | 0.908437931 |
| ecb_00425 | adk  | -0.092314816 | 0.908437931 |
| ecb_03100 | aaeB | 0.092926596  | 0.908623728 |
| ecb_04011 | yjeH | -0.099906556 | 0.908623728 |
| ecb_02674 | ppdA | 0.082360764  | 0.908623728 |
| ecb_01229 | yciC | 0.062553026  | 0.908623728 |
| ecb_03782 | frvR | 0.117998885  | 0.908623728 |
| ecb_02761 | yggF | 0.109048882  | 0.908623728 |
| ecb_01773 | yeaX | 0.121290745  | 0.908623728 |
| ecb_01620 | nemA | -0.073563351 | 0.908623728 |
| ecb_02082 | folE | 0.059726771  | 0.90862914  |
| ecb_01419 | pptA | -0.092279663 | 0.909129793 |
| ecb_01039 | csgA | -0.08350148  | 0.909129793 |
| ecb_03853 | murB | 0.077130742  | 0.909129793 |
| ecb_03990 | melA | 0.092656968  | 0.909129793 |
| ecb_01294 | ycjU | 0.097195736  | 0.909129793 |
| ecb_00772 | fiu  | -0.103255969 | 0.909129793 |
| ecb_03619 | atpH | 0.144293778  | 0.909129793 |
| ecb_01874 | yecH | 0.082961712  | 0.909129793 |
| ecb_00499 | ybcO | 0.108755597  | 0.909129793 |
| ecb_02051 | yehQ | -0.110765    | 0.909129793 |
| ecb_02031 | thiD | -0.088433041 | 0.911089986 |
| ecb_02263 | yfcV | 0.085017039  | 0.911089986 |
| ecb_02139 | alkB | 0.091994196  | 0.911089986 |
| ecb_02990 | garR | 0.09595899   | 0.911089986 |
| ecb_00583 | citF | 0.094946059  | 0.911089986 |
| ecb_04002 | cadA | 0.106228869  | 0.911089986 |
| ecb_00082 | mraZ | -0.080806921 | 0.911089986 |

|           |      |              |             |
|-----------|------|--------------|-------------|
| ecb_04135 | ahr  | 0.103243347  | 0.911089986 |
| ecb_03046 | greA | -0.092828588 | 0.911089986 |
| ecb_01034 | csgG | 0.08914415   | 0.911089986 |
| ecb_02896 | ygiW | -0.081288064 | 0.911186906 |
| ecb_01900 | cobT | 0.107247136  | 0.911335536 |
| ecb_00878 | hcp  | 0.072386555  | 0.912390892 |
| ecb_01016 | rutR | 0.104046345  | 0.912390892 |
| ecb_00041 | caiC | 0.091668161  | 0.912390892 |
| ecb_00045 | fixA | 0.095024004  | 0.912390892 |
| ecb_01000 | torA | 0.067722503  | 0.912390892 |
| ecb_03263 | yhgA | -0.076884872 | 0.913624394 |
| ecb_02642 | sdaB | -0.097330346 | 0.913752667 |
| ecb_03650 | ilvA | -0.08182494  | 0.913752667 |
| ecb_01440 | osmC | -0.103156351 | 0.915015053 |
| ecb_03292 | yhhY | 0.152670526  | 0.915015053 |
| ecb_03237 | gph  | 0.08078837   | 0.915015053 |
| ecb_02273 | yfdC | 0.101600318  | 0.915015053 |
| ecb_03206 | prkB | -0.079536315 | 0.915015053 |
| ecb_02918 | yqil | 0.092863421  | 0.915015053 |
| ecb_02946 | ebgC | 0.105364352  | 0.915015053 |
| ecb_00779 | dps  | 0.065403198  | 0.915015053 |
| ecb_00894 | ftsK | -0.091797543 | 0.915015053 |
| ecb_03772 | dtd  | 0.055480989  | 0.915488878 |
| ecb_01322 | intR | -0.179437154 | 0.915621871 |
| ecb_00720 | pgl  | 0.118314447  | 0.915621871 |
| ecb_02421 | iscU | -0.057245541 | 0.915621871 |
| ecb_01744 | ydjK | 0.069027268  | 0.915621871 |
| ecb_02326 | ucpA | 0.093682289  | 0.915621871 |
| ecb_02707 | yqeA | -0.078375906 | 0.916043824 |
| ecb_01361 | ydbC | -0.076952075 | 0.916520686 |
| ecb_04185 | fimC | 0.111822872  | 0.916520686 |
| ecb_02566 | ascB | -0.076867595 | 0.916928332 |
| ecb_01876 | yecA | 0.087435434  | 0.917115405 |
| ecb_02371 | gcvR | 0.079108062  | 0.917115405 |
| ecb_00998 | torR | 0.064699815  | 0.917115405 |
| ecb_01169 | ycgR | -0.078079051 | 0.917115405 |
| ecb_04022 | ampC | 0.152108945  | 0.917115405 |
| ecb_03553 | uhpA | 0.074960261  | 0.917367875 |
| ecb_04123 | yjgN | 0.084459205  | 0.917367875 |
| ecb_02181 | arnA | -0.092879958 | 0.917367875 |
| ecb_00941 | ssuE | 0.070257678  | 0.917367875 |
| ecb_00805 | gstB | -0.089358984 | 0.917367875 |
| ecb_03815 | menA | 0.07452682   | 0.917367875 |
| ecb_02697 | ygeQ | 0.095450204  | 0.917367875 |
| ecb_01291 | ycjR | 0.086361196  | 0.917367875 |
| ecb_01038 | csgB | 0.070877773  | 0.917367875 |
| ecb_04048 | yjfl | -0.141434287 | 0.917367875 |
| ecb_00799 | gsiD | -0.092015902 | 0.917367875 |
| ecb_01375 | ydcA | -0.113628675 | 0.9174169   |
| ecb_01118 | cobB | -0.060810743 | 0.9174169   |

|           |      |              |             |
|-----------|------|--------------|-------------|
| ecb_01042 | ymdB | -0.115982345 | 0.9174169   |
| ecb_00501 | ylcG | 0.163420973  | 0.918289428 |
| ecb_02524 | ygaP | 0.062511038  | 0.918440853 |
| ecb_00691 | mngB | 0.084589418  | 0.918440853 |
| ecb_00448 | rhdD | -0.093577483 | 0.918992786 |
| ecb_02952 | higB | 0.088895058  | 0.918992786 |
| ecb_04250 | prfC | 0.081916187  | 0.919007149 |
| ecb_00199 | gmhB | -0.08855019  | 0.919007149 |
| ecb_01817 | yebE | -0.081236358 | 0.919239141 |
| ecb_01196 | chaC | -0.074430021 | 0.919239141 |
| ecb_00757 | ybhP | -0.114057884 | 0.919239141 |
| ecb_00654 | kdpB | 0.082403757  | 0.919239141 |
| ecb_00658 | rhcC | -0.126596345 | 0.919239141 |
| ecb_00458 | hyi  | 0.094593757  | 0.919239141 |
| ecb_01388 | ydcL | -0.096017056 | 0.919239141 |
| ecb_04239 | dnaT | -0.066781962 | 0.919239141 |
| ecb_00558 | entS | 0.134659305  | 0.919239141 |
| ecb_02394 | ppx  | 0.076079242  | 0.919307242 |
| ecb_02871 | hybB | 0.105863976  | 0.919307242 |
| ecb_02692 | yqeF | -0.158223168 | 0.920452583 |
| ecb_01030 | ghrA | 0.072181513  | 0.920452583 |
| ecb_02889 | ftsP | -0.102389774 | 0.920509011 |
| ecb_00053 | apaH | 0.098741891  | 0.920869338 |
| ecb_02787 | ansB | -0.132530488 | 0.922057754 |
| ecb_00318 | tauD | 0.135971193  | 0.922057754 |
| ecb_00960 | matP | -0.091238301 | 0.922088968 |
| ecb_00368 | dxs  | 0.153115017  | 0.922911497 |
| ecb_03173 | gspB | 0.132287755  | 0.923146662 |
| ecb_03989 | meiR | -0.1023357   | 0.923352946 |
| ecb_00134 | yadC | 0.081678951  | 0.923352946 |
| ecb_01250 | topA | 0.0602691    | 0.923839749 |
| ecb_03687 | xerC | 0.096176613  | 0.924196625 |
| ecb_02167 | glpA | 0.090762292  | 0.924552121 |
| ecb_00088 | mraY | -0.101461106 | 0.924646004 |
| ecb_03608 | phoU | -0.061988615 | 0.924840597 |
| ecb_01833 | yebB | -0.095588043 | 0.924883877 |
| ecb_00161 | cdaR | -0.10261615  | 0.924886212 |
| ecb_00449 | ybbC | -0.13680657  | 0.92753411  |
| ecb_03008 | agal | 0.083124782  | 0.92753411  |
| ecb_03246 | hofN | 0.064689881  | 0.92753411  |
| ecb_02501 | yfjD | 0.057785742  | 0.92753411  |
| ecb_02075 | preT | 0.084171692  | 0.928262503 |
| ecb_01579 | tus  | -0.115388597 | 0.928571026 |
| ecb_00952 | rlmL | 0.099110079  | 0.92878139  |
| ecb_01766 | yeaR | 0.109617473  | 0.92878139  |
| ecb_02087 | yehH | 0.073249062  | 0.92878139  |
| ecb_03573 | cbrA | -0.070195211 | 0.92878139  |
| ecb_01801 | prc  | 0.103189859  | 0.92878139  |
| ecb_03204 | yheT | -0.124739905 | 0.92878139  |
| ecb_03039 | yhbX | 0.116722885  | 0.92878139  |



|           |      |              |             |
|-----------|------|--------------|-------------|
| ecb_04266 | nadR | -0.108559875 | 0.929073204 |
| ecb_01770 | dmlA | 0.083557037  | 0.929344978 |
| ecb_02372 | bcp  | 0.08273788   | 0.929421133 |
| ecb_03954 | mdtN | 0.087160148  | 0.930380867 |
| ecb_01556 | ynfE | 0.076646822  | 0.930380867 |
| ecb_03092 | yhcM | 0.076001497  | 0.930638123 |
| ecb_01531 | rem  | -0.078105402 | 0.930767211 |
| ecb_03243 | hofQ | 0.072085474  | 0.930775507 |
| ecb_03832 | fsaB | 0.068186758  | 0.930775507 |
| ecb_00771 | ybiX | -0.072940452 | 0.930775507 |
| ecb_03947 | nrfF | -0.054465886 | 0.931351139 |
| ecb_02260 | yfcR | 0.103313611  | 0.932080406 |
| ecb_01333 | ydaG | -0.096831804 | 0.932080406 |
| ecb_00977 | hyaC | 0.069971267  | 0.932080406 |
| ecb_00269 | betI | 0.082813658  | 0.932080406 |
| ecb_01617 | ydhF | 0.05867098   | 0.932080406 |
| ecb_01891 | yeeJ | 0.060017971  | 0.932080406 |
| ecb_02121 | ccmH | 0.152995563  | 0.932080406 |
| ecb_01231 | yciE | 0.091189435  | 0.932326648 |
| ecb_03244 | hofP | 0.078496152  | 0.932326648 |
| ecb_00468 | fdrA | 0.0913326    | 0.932326648 |
| ecb_03987 | adiY | 0.117392563  | 0.932326648 |
| ecb_01599 | rsxC | -0.09901672  | 0.932326648 |
| ecb_03691 | yigE | 0.068988309  | 0.932326648 |
| ecb_03218 | nirC | 0.076955694  | 0.932326648 |
| ecb_00436 | ybaS | 0.077638984  | 0.932326648 |
| ecb_04265 | radA | -0.112725717 | 0.932477493 |
| ecb_03047 | dacB | -0.125320861 | 0.932477493 |
| ecb_01226 | tonB | -0.088209471 | 0.933187804 |
| ecb_04127 | lptF | 0.069206509  | 0.933187804 |
| ecb_03180 | gspH | 0.130230169  | 0.933187804 |
| ecb_03881 | zraR | 0.076077924  | 0.933187804 |
| ecb_02721 | idi  | -0.097803934 | 0.933187804 |
| ecb_03773 | yiiD | 0.060878539  | 0.933187804 |
| ecb_01215 | adhE | 0.065017723  | 0.933187804 |
| ecb_02500 | ypjD | 0.062521742  | 0.933187804 |
| ecb_03717 | ysgA | 0.054446315  | 0.933187804 |
| ecb_03006 | agaC | 0.078145411  | 0.933187804 |
| ecb_03452 | yibH | 0.075257131  | 0.933187804 |
| ecb_00885 | cspD | -0.150146877 | 0.933187804 |
| ecb_02211 | nuoC | 0.0704433    | 0.933187804 |
| ecb_02916 | yqiG | 0.097150997  | 0.933187804 |
| ecb_03334 | yhhI | -0.13020403  | 0.933187804 |
| ecb_01842 | cmoB | 0.108200445  | 0.933187804 |
| ecb_02020 | gatA | 0.085888156  | 0.933187804 |
| ecb_00888 | infA | -0.109649858 | 0.933187804 |
| ecb_03878 | yjaH | -0.075851263 | 0.933187804 |
| ecb_03666 | rffG | 0.070832376  | 0.933187804 |
| ecb_00912 | aroA | 0.109751148  | 0.933187804 |
| ecb_02738 | ubil | -0.085717826 | 0.933187804 |

|           |      |              |             |
|-----------|------|--------------|-------------|
| ecb_02662 | csdE | 0.054074572  | 0.933971411 |
| ecb_00698 | tolR | 0.073170412  | 0.934018044 |
| ecb_03838 | frwD | -0.067499206 | 0.934018044 |
| ecb_01472 | ydeZ | 0.103935658  | 0.934018044 |
| ecb_03688 | yigB | 0.084533958  | 0.934018044 |
| ecb_02047 | yehK | -0.143569377 | 0.935144093 |
| ecb_00200 | dkgB | -0.13962888  | 0.935263372 |
| ecb_00703 | nadA | -0.081261763 | 0.935358923 |
| ecb_01426 | narG | 0.100744657  | 0.935358923 |
| ecb_00100 | mutT | -0.092549822 | 0.935358923 |
| ecb_01348 | ompN | 0.084380935  | 0.936208757 |
| ecb_03944 | nrfC | 0.063800582  | 0.936284703 |
| ecb_04242 | yjjQ | 0.080044412  | 0.936284703 |
| ecb_02673 | ppdB | 0.054181751  | 0.936284703 |
| ecb_00648 | potE | 0.053739265  | 0.936567146 |
| ecb_02559 | norR | 0.058737296  | 0.936567146 |
| ecb_01044 | opgC | 0.078364617  | 0.936567146 |
| ecb_03757 | yihL | 0.105310255  | 0.936567146 |
| ecb_03888 | aceK | -0.074521645 | 0.936567146 |
| ecb_02159 | yfaL | -0.067678822 | 0.936567146 |
| ecb_03754 | glnL | -0.120878658 | 0.936567146 |
| ecb_01668 | ydiS | -0.059764484 | 0.936567146 |
| ecb_00776 | glnQ | 0.065697663  | 0.936567146 |
| ecb_00599 | lipB | 0.054649859  | 0.936567146 |
| ecb_03589 | yidC | 0.054818954  | 0.937161909 |
| ecb_02895 | ygiV | 0.098892414  | 0.937179418 |
| ecb_03910 | yjbl | -0.065791808 | 0.937222909 |
| ecb_03220 | yhfL | 0.096867221  | 0.937569927 |
| ecb_02318 | pdxK | -0.10529755  | 0.937569927 |
| ecb_02675 | thyA | 0.075688657  | 0.937569927 |
| ecb_03980 | crfC | 0.072962971  | 0.937569927 |
| ecb_01637 | ydhS | -0.103726464 | 0.937569927 |
| ecb_01772 | yeaW | 0.100159602  | 0.937569927 |
| ecb_02060 | yehY | -0.079887364 | 0.937569927 |
| ecb_00331 | psiF | -0.081738413 | 0.937569927 |
| ecb_02627 | mazF | -0.088934058 | 0.937791304 |
| ecb_00103 | coaE | 0.062019469  | 0.937791304 |
| ecb_03375 | yhjJ | -0.086243154 | 0.937791304 |
| ecb_00480 | sfmA | 0.075620178  | 0.937791304 |
| ecb_01299 | ycjF | 0.065014409  | 0.937791304 |
| ecb_01688 | thrS | 0.065712032  | 0.937791304 |
| ecb_03099 | yhcO | -0.080358167 | 0.937791304 |
| ecb_01483 | yneJ | 0.093860591  | 0.937791304 |
| ecb_02447 | yfhG | 0.057166971  | 0.937791304 |
| ecb_00404 | tesB | -0.073224855 | 0.937791304 |
| ecb_04272 | rob  | -0.056256925 | 0.938306655 |
| ecb_02310 | ypeB | -0.078984036 | 0.938306655 |
| ecb_03704 | pldB | 0.060387534  | 0.938458119 |
| ecb_00114 | aceF | 0.058730837  | 0.938458119 |
| ecb_01397 | ydcS | 0.075044276  | 0.938458119 |

|           |      |              |             |
|-----------|------|--------------|-------------|
| ecb_01112 | lolC | -0.075190309 | 0.938458119 |
| ecb_02332 | yfeY | -0.101171527 | 0.938458119 |
| ecb_00608 | nadD | -0.077917296 | 0.938458119 |
| ecb_01858 | cheW | 0.058238718  | 0.938458119 |
| ecb_03627 | asnC | -0.172030793 | 0.938695289 |
| ecb_03677 | hemY | -0.087504973 | 0.939715561 |
| ecb_00968 | yccT | 0.066332421  | 0.939715561 |
| ecb_02095 | psuK | 0.072574079  | 0.940608553 |
| ecb_00197 | metI | 0.085340547  | 0.940895883 |
| ecb_03044 | rlmE | 0.067679401  | 0.940895883 |
| ecb_03964 | phnP | -0.08168661  | 0.940895883 |
| ecb_02713 | ygfM | 0.110515089  | 0.941016412 |
| ecb_02357 | ypfG | 0.081220022  | 0.941016412 |
| ecb_01225 | ycil | 0.089640768  | 0.941016412 |
| ecb_00303 | mhpC | -0.068019049 | 0.941016412 |
| ecb_01615 | ydhK | -0.073987375 | 0.941016412 |
| ecb_02806 | yeeT | 0.094063484  | 0.941016412 |
| ecb_02943 | ygjH | 0.07180356   | 0.941016412 |
| ecb_03746 | dsbA | 0.085893681  | 0.941016412 |
| ecb_00790 | ybiW | 0.084297945  | 0.941048052 |
| ecb_02563 | hydN | -0.073396095 | 0.942493343 |
| ecb_00443 | ybbN | 0.064082199  | 0.942493343 |
| ecb_03788 | rhaD | -0.093959301 | 0.942493343 |
| ecb_03780 | fdhD | 0.063277402  | 0.9426152   |
| ecb_03178 | gspF | 0.110453285  | 0.942921284 |
| ecb_00369 | ispA | 0.144699183  | 0.942976009 |
| ecb_03805 | yiiQ | 0.062337413  | 0.942976009 |
| ecb_01425 | narH | 0.068062867  | 0.942976009 |
| ecb_02272 | mIaA | -0.085820043 | 0.942976009 |
| ecb_03319 | tusA | -0.098484565 | 0.942976009 |
| ecb_03956 | alsK | 0.083171636  | 0.942976009 |
| ecb_01172 | treA | 0.056304418  | 0.942976009 |
| ecb_02151 | atoB | 0.071107975  | 0.94333282  |
| ecb_00137 | yadM | 0.076900518  | 0.94333282  |
| ecb_00986 | gfcE | 0.068996121  | 0.94333282  |
| ecb_03923 | qor  | 0.072022206  | 0.94333282  |
| ecb_00178 | fabZ | -0.071565229 | 0.94333282  |
| ecb_01131 | mnmA | -0.085771183 | 0.94333282  |
| ecb_02107 | yejA | 0.053787075  | 0.94333282  |
| ecb_03729 | tatA | 0.054493387  | 0.94333282  |
| ecb_04054 | aidB | 0.06775036   | 0.94333282  |
| ecb_02308 | yfeR | 0.057346052  | 0.94333282  |
| ecb_03842 | argE | -0.137977906 | 0.94333282  |
| ecb_03122 | envR | 0.082311336  | 0.943445008 |
| ecb_02423 | iscR | -0.051797728 | 0.943445008 |
| ecb_02944 | ebgR | -0.077298798 | 0.943445008 |
| ecb_02316 | ptsI | -0.055653586 | 0.943739259 |
| ecb_02172 | yfaV | 0.051551038  | 0.943739259 |
| ecb_03029 | deaD | 0.077062038  | 0.943739259 |
| ecb_02890 | plsC | -0.088034015 | 0.943739259 |

|           |      |              |             |
|-----------|------|--------------|-------------|
| ecb_02945 | ebgA | 0.057361968  | 0.943769322 |
| ecb_03363 | gadW | -0.14199513  | 0.943769322 |
| ecb_00215 | ivy  | 0.074486778  | 0.944119859 |
| ecb_00677 | ybgP | -0.115094828 | 0.944119859 |
| ecb_02538 | ygaH | -0.052058797 | 0.944260497 |
| ecb_03451 | yibG | -0.149166506 | 0.944266128 |
| ecb_00013 | yaal | 0.051322812  | 0.94443022  |
| ecb_02612 | ygcO | -0.05726844  | 0.944685608 |
| ecb_00104 | guaC | -0.069088158 | 0.944721759 |
| ecb_03242 | aroK | -0.048197468 | 0.944829828 |
| ecb_01704 | chbR | 0.052252759  | 0.944915055 |
| ecb_00165 | glnD | 0.058357055  | 0.944915055 |
| ecb_04183 | fimA | -0.048661249 | 0.944915055 |
| ecb_02547 | alaS | 0.066756726  | 0.944915055 |
| ecb_01278 | puuB | 0.135246828  | 0.944915055 |
| ecb_02298 | glk  | -0.08406094  | 0.944915055 |
| ecb_01813 | holE | -0.091896808 | 0.944915055 |
| ecb_00039 | caiE | 0.069966147  | 0.944915055 |
| ecb_00961 | ompA | -0.046936739 | 0.944915055 |
| ecb_04070 | rplI | -0.084931186 | 0.944915055 |
| ecb_01174 | dhaL | 0.07406834   | 0.944915055 |
| ecb_02028 | yegV | -0.055726353 | 0.944915055 |
| ecb_03358 | hdeA | 0.078652053  | 0.944915055 |
| ecb_02699 | xdhA | 0.07576321   | 0.944915055 |
| ecb_00570 | ybdN | 0.051100432  | 0.944915055 |
| ecb_01892 | yeeL | 0.078717309  | 0.944915055 |
| ecb_01975 | yegD | 0.067350244  | 0.944915055 |
| ecb_01661 | ydiB | 0.072949476  | 0.944915055 |
| ecb_02176 | yfaZ | -0.054573704 | 0.944915055 |
| ecb_02014 | yegR | -0.125483284 | 0.944915055 |
| ecb_03314 | rsmD | 0.052052156  | 0.944915055 |
| ecb_03177 | gspE | 0.12728562   | 0.944915055 |
| ecb_01399 | ydcU | 0.084168441  | 0.944915055 |
| ecb_04101 | mpl  | -0.061477712 | 0.944915055 |
| ecb_01977 | yegK | -0.072265763 | 0.944915055 |
| ecb_00744 | bioC | 0.112605906  | 0.944915055 |
| ecb_02476 | trxC | -0.078965036 | 0.944915055 |
| ecb_02997 | kbaZ | 0.061410473  | 0.944915055 |
| ecb_00163 | yael | -0.069862206 | 0.944915055 |
| ecb_02712 | ssnA | 0.111702545  | 0.944915055 |
| ecb_00064 | araA | -0.063732803 | 0.944915055 |
| ecb_01173 | dhaM | 0.087176927  | 0.944915055 |
| ecb_01434 | fdnI | 0.100067173  | 0.944915055 |
| ecb_04065 | ulaF | 0.063457965  | 0.944915055 |
| ecb_03051 | rplU | -0.051269517 | 0.944915055 |
| ecb_03765 | yihS | 0.066736117  | 0.944915055 |
| ecb_02575 | hycA | 0.084741412  | 0.944915055 |
| ecb_03514 | yicl | 0.151301349  | 0.944915055 |
| ecb_04134 | idnK | 0.081789464  | 0.944915055 |
| ecb_02807 | yeeU | -0.156879866 | 0.944915055 |

|           |      |              |             |
|-----------|------|--------------|-------------|
| ecb_02897 | qseB | 0.052503945  | 0.944961573 |
| ecb_01298 | ycjX | 0.094425812  | 0.944961573 |
| ecb_01091 | fabF | 0.088878124  | 0.945996772 |
| ecb_01913 | dacD | 0.078601946  | 0.946077167 |
| ecb_03613 | glmS | 0.187153428  | 0.946098612 |
| ecb_01963 | wcaC | 0.062635593  | 0.946591052 |
| ecb_00119 | speD | 0.093639454  | 0.946591052 |
| ecb_03412 | ysaB | 0.089790812  | 0.94782522  |
| ecb_01288 | ycjO | 0.070141325  | 0.94782522  |
| ecb_00467 | allD | 0.075493239  | 0.948087931 |
| ecb_03205 | yheU | -0.073851569 | 0.948489104 |
| ecb_02611 | ygcN | 0.087766117  | 0.948489104 |
| ecb_01592 | add  | 0.053431022  | 0.948489104 |
| ecb_03807 | yiiS | -0.103437057 | 0.949414967 |
| ecb_03058 | mIaD | -0.063089327 | 0.949414967 |
| ecb_00668 | phr  | -0.066795697 | 0.949414967 |
| ecb_00419 | ybaN | -0.082412168 | 0.949414967 |
| ecb_03352 | arsC | 0.098413161  | 0.949414967 |
| ecb_01119 | ycfZ | 0.094859449  | 0.949414967 |
| ecb_00287 | prpC | -0.061158696 | 0.949414967 |
| ecb_01170 | ymgE | -0.070831394 | 0.949414967 |
| ecb_02572 | hycD | 0.078464207  | 0.949414967 |
| ecb_00801 | yliF | 0.064778336  | 0.949414967 |
| ecb_02700 | xdhB | 0.073239015  | 0.949414967 |
| ecb_02483 | yfiH | 0.053798759  | 0.949414967 |
| ecb_01132 | nudJ | 0.091372996  | 0.952146609 |
| ecb_01756 | yeaK | 0.049029324  | 0.952191306 |
| ecb_02527 | ygaC | -0.074123644 | 0.953250783 |
| ecb_03063 | kdsC | -0.04304276  | 0.953250783 |
| ecb_03899 | yjbF | -0.075170569 | 0.953250783 |
| ecb_03848 | fabR | 0.053002957  | 0.953250783 |
| ecb_02254 | aroC | -0.088039465 | 0.953250783 |
| ecb_03113 | accB | 0.044448499  | 0.953250783 |
| ecb_04128 | lptG | -0.064347768 | 0.953250783 |
| ecb_01152 | ycgJ | 0.077962179  | 0.953250783 |
| ecb_01350 | ydbJ | 0.086171255  | 0.953250783 |
| ecb_03086 | nanR | -0.051507909 | 0.953250783 |
| ecb_01096 | ycfH | -0.051760351 | 0.953250783 |
| ecb_00582 | citX | 0.056671247  | 0.953250783 |
| ecb_01663 | ydiF | 0.090532021  | 0.953250783 |
| ecb_02443 | glyA | -0.114435414 | 0.953250783 |
| ecb_01449 | yddW | -0.066780775 | 0.953250783 |
| ecb_01313 | abgT | 0.0971459    | 0.953250783 |
| ecb_00454 | allS | 0.064382102  | 0.953250783 |
| ecb_03187 | bfr  | -0.083079688 | 0.953250783 |
| ecb_03445 | selB | -0.072133347 | 0.953250783 |
| ecb_03109 | mreC | 0.046223923  | 0.953250783 |
| ecb_01847 | argS | 0.099392968  | 0.953250783 |
| ecb_00900 | dmsC | 0.053489718  | 0.953250783 |
| ecb_03856 | tufB | 0.040426529  | 0.953250783 |

|           |      |              |             |
|-----------|------|--------------|-------------|
| ecb_03591 | tnaC | 0.226899114  | 0.953250783 |
| ecb_00881 | ybjD | 0.077294591  | 0.953250783 |
| ecb_00426 | hemH | 0.052922076  | 0.953250783 |
| ecb_00934 | asnS | -0.071355586 | 0.953250783 |
| ecb_02709 | yqeC | 0.088148124  | 0.953250783 |
| ecb_01287 | ycjN | 0.081092301  | 0.953250783 |
| ecb_04182 | fimE | -0.059542926 | 0.953250783 |
| ecb_03600 | cbrB | -0.103950955 | 0.953250783 |
| ecb_02985 | tdcA | 0.077431752  | 0.953250783 |
| ecb_03082 | nanK | -0.142501891 | 0.953250783 |
| ecb_04126 | pepA | 0.054805677  | 0.953250783 |
| ecb_02218 | yfbT | 0.091864732  | 0.95429934  |
| ecb_03034 | rbfA | 0.049632766  | 0.955411802 |
| ecb_01608 | pdxH | 0.058137541  | 0.956346343 |
| ecb_00286 | prpB | 0.06555773   | 0.95648     |
| ecb_01120 | ymfA | -0.070979054 | 0.95648     |
| ecb_03416 | xylB | 0.070493916  | 0.95691529  |
| ecb_00983 | appA | 0.060649471  | 0.95691529  |
| ecb_04082 | ytfF | 0.059022914  | 0.95691529  |
| ecb_02079 | mgIB | -0.156761306 | 0.95691529  |
| ecb_04009 | aspA | -0.079537319 | 0.95691529  |
| ecb_04264 | serB | 0.049905831  | 0.95691529  |
| ecb_04131 | idnT | 0.082207545  | 0.95691529  |
| ecb_01023 | pgaD | -0.052240433 | 0.95691529  |
| ecb_02220 | yfbV | 0.045509367  | 0.95691529  |
| ecb_01025 | pgaB | 0.063330336  | 0.95691529  |
| ecb_01958 | fcl  | 0.075202662  | 0.95691529  |
| ecb_02299 | yfeO | -0.059491906 | 0.95691529  |
| ecb_00285 | prpR | -0.068713527 | 0.95691529  |
| ecb_02486 | raiA | -0.106334835 | 0.95691529  |
| ecb_01496 | ydeJ | 0.090520017  | 0.95691529  |
| ecb_03054 | murA | 0.055219688  | 0.95691529  |
| ecb_03581 | yidB | 0.06339978   | 0.95691529  |
| ecb_01739 | ydjF | -0.059069282 | 0.95691529  |
| ecb_03929 | yjbR | -0.066790384 | 0.95691529  |
| ecb_02746 | yqfE | 0.052168059  | 0.95691529  |
| ecb_03428 | yiaL | 0.094884134  | 0.95691529  |
| ecb_03415 | yiaB | -0.111279949 | 0.95691529  |
| ecb_00679 | ybgD | -0.089242288 | 0.95691529  |
| ecb_00948 | ycbF | -0.059660936 | 0.95691529  |
| ecb_03406 | cspA | -0.043655869 | 0.95691529  |
| ecb_01285 | pspE | 0.099124882  | 0.95691529  |
| ecb_02868 | hybE | 0.093689624  | 0.957112012 |
| ecb_02418 | hscA | -0.106370499 | 0.957112012 |
| ecb_01339 | trkG | -0.060938598 | 0.957112012 |
| ecb_02091 | rihB | -0.052455992 | 0.957112012 |
| ecb_01627 | ydhP | -0.07407982  | 0.957112012 |
| ecb_03634 | rbsD | 0.072243601  | 0.957112012 |
| ecb_02937 | rpoD | 0.049796262  | 0.957112012 |
| ecb_02778 | yqgE | -0.068995531 | 0.957112012 |

|            |      |              |             |
|------------|------|--------------|-------------|
| ecb_00370  | xseB | 0.061863229  | 0.957112012 |
| ecb_04050  | yjfK | 0.058925993  | 0.957112012 |
| ecb_02407  | ispG | -0.043982012 | 0.957987876 |
| ecb_02153  | yfaQ | 0.070546135  | 0.958154073 |
| ecb_03616  | atpD | 0.047614293  | 0.958920177 |
| ecb_02763  | cmrA | 0.058157264  | 0.959255248 |
| ecb_03849  | yijD | -0.055615953 | 0.959255248 |
| ecb_02705  | ygeY | 0.075050152  | 0.959255248 |
| ecb_01391  | ydcO | 0.086234612  | 0.959255248 |
| ecb_02915  | ygiL | -0.047343433 | 0.959255248 |
| ecb_02356  | tkrB | -0.060735793 | 0.959255248 |
| ecb_01964  | wcaB | 0.06941596   | 0.959255248 |
| ecb_03726  | ubiE | 0.04564779   | 0.95935671  |
| ecb_01009  | rutG | -0.063133374 | 0.95935671  |
| ecb_03840  | eptC | -0.072116582 | 0.95935671  |
| ecb_01810  | yebY | 0.078524445  | 0.95935671  |
| ecb_01500  | ydfZ | -0.087715096 | 0.95935671  |
| ecb_01474  | lsrF | 0.087108455  | 0.95935671  |
| ecb_03035  | infB | -0.053017281 | 0.95935671  |
| ecb_00182  | dnaE | -0.068361826 | 0.95935671  |
| ecb_01550  | rspA | -0.045895037 | 0.95935671  |
| ecb_03367  | trfF | 0.075408519  | 0.95935671  |
| ecb_04064  | ulaE | 0.061787769  | 0.95935671  |
| ecb_01860  | motB | -0.067350097 | 0.95935671  |
| ecb_01478  | uxaB | -0.084772879 | 0.95935671  |
| ecb_01093  | yceG | -0.05089848  | 0.95935671  |
| ecb_02120  | narP | 0.047093828  | 0.95935671  |
| ecb_00273  | yahC | 0.093482486  | 0.95935671  |
| ecb_01317  | smrA | 0.046514002  | 0.95935671  |
| ecb_01938  | wzy  | 0.07097824   | 0.95935671  |
| ecb_03730  | tatB | 0.044248215  | 0.95935671  |
| ecb_00001  | thrL | 0.178828261  | 0.95935671  |
| ecb_03644  | yifB | 0.052841064  | 0.95935671  |
| ecb_03764  | yihR | 0.076997934  | 0.95935671  |
| ecb_01223  | clsA | -0.039904395 | 0.95935671  |
| ecb_01832  | ruvA | 0.069528535  | 0.95935671  |
| ecb_01920  | hisL | 0.237554678  | 0.95935671  |
| ecb_r00006 | rrsG | -0.049350578 | 0.95935671  |
| ecb_03857  | secE | -0.096688909 | 0.95935671  |
| ecb_01666  | ydiQ | 0.069922757  | 0.95935671  |
| ecb_02565  | ascF | 0.055802983  | 0.95935671  |
| ecb_03584  | dnaN | 0.061245523  | 0.95935671  |
| ecb_04040  | hflX | 0.056343741  | 0.95935671  |
| ecb_01459  | ydeP | 0.110959832  | 0.95935671  |
| ecb_00447  | ybbP | 0.09535494   | 0.95935671  |
| ecb_03955  | yjcS | 0.086546275  | 0.95935671  |
| ecb_02267  | yfcZ | 0.056461662  | 0.95935671  |
| ecb_00596  | tatE | 0.088264466  | 0.95935671  |
| ecb_00007  | yaaJ | 0.048217114  | 0.95935671  |
| ecb_01216  | yche | 0.063137546  | 0.95935671  |

|            |      |              |            |
|------------|------|--------------|------------|
| ecb_03837  | pflC | 0.045229528  | 0.95935671 |
| ecb_00508  | rzpD | -0.071623173 | 0.95935671 |
| ecb_02473  | grcA | 0.073086448  | 0.95935671 |
| ecb_03064  | lptC | -0.051394102 | 0.95935671 |
| ecb_01396  | ydcR | 0.06425499   | 0.95935671 |
| ecb_00568  | ybdL | 0.051132816  | 0.95935671 |
| ecb_02844  | glcB | -0.041138889 | 0.95935671 |
| ecb_02179  | arnB | 0.051694309  | 0.95935671 |
| ecb_02973  | yhal | 0.06983868   | 0.95935671 |
| ecb_r00001 | rrsH | -0.042182033 | 0.95935671 |
| ecb_03781  | yiiG | 0.07356737   | 0.95935671 |
| ecb_02309  | yfeH | 0.070078355  | 0.95935671 |
| ecb_03355  | dctR | 0.094157712  | 0.95935671 |
| ecb_02393  | ppk  | 0.062705288  | 0.95935671 |
| ecb_03081  | yhcH | 0.046562715  | 0.95935671 |
| ecb_02399  | guaA | -0.080058835 | 0.95935671 |
| ecb_01654  | ydiH | -0.061661306 | 0.95935671 |
| ecb_00913  | ycaL | 0.085018518  | 0.95935671 |
| ecb_04269  | trpR | -0.080729722 | 0.95935671 |
| ecb_00027  | rpsT | -0.067470772 | 0.95935671 |
| ecb_02739  | ubiH | -0.064935803 | 0.95935671 |
| ecb_03275  | glpG | 0.062724396  | 0.95935671 |
| ecb_01682  | pheT | 0.05651655   | 0.95935671 |
| ecb_01233  | yciG | 0.071403719  | 0.95935671 |
| ecb_03548  | yicO | 0.062179174  | 0.95935671 |
| ecb_03117  | prmA | 0.045150671  | 0.95935671 |
| ecb_00241  | yagP | -0.066074555 | 0.95935671 |
| ecb_03975  | phnE | -0.130618758 | 0.95935671 |
| ecb_00258  | rclC | 0.07679907   | 0.95935671 |
| ecb_02949  | ygjK | -0.051297178 | 0.95935671 |
| ecb_01879  | uvrY | 0.063235872  | 0.95935671 |
| ecb_01574  | ydgI | 0.074785131  | 0.95935671 |
| ecb_03560  | yidH | -0.062174316 | 0.95935671 |
| ecb_02283  | oxc  | 0.072448065  | 0.95935671 |
| ecb_00902  | ycaD | 0.045474678  | 0.95935671 |
| ecb_04023  | frdD | 0.064412094  | 0.95935671 |
| ecb_00342  | rdgC | 0.050555104  | 0.95935671 |
| ecb_01667  | ydiR | 0.081131227  | 0.95935671 |
| ecb_03108  | mreD | -0.052405478 | 0.95935671 |
| ecb_01475  | lsrG | 0.100677893  | 0.95935671 |
| ecb_02586  | ygbJ | 0.04878107   | 0.95935671 |
| ecb_01696  | yniC | 0.056853342  | 0.95935671 |
| ecb_00131  | yadD | 0.058067412  | 0.95935671 |
| ecb_03130  | yrdA | 0.047132726  | 0.95935671 |
| ecb_03969  | phnK | 0.07378302   | 0.95935671 |
| ecb_04051  | yjfl | 0.072930873  | 0.95935671 |
| ecb_03313  | ftsY | -0.042325524 | 0.95935671 |
| ecb_02374  | hyfB | 0.053403291  | 0.95935671 |
| ecb_01408  | yncD | -0.053134558 | 0.95935671 |
| ecb_03985  | eptA | -0.051272846 | 0.95935671 |



|           |      |              |             |
|-----------|------|--------------|-------------|
| ecb_01004 | yccE | -0.106673534 | 0.95935671  |
| ecb_01286 | ycjM | -0.051751407 | 0.95935671  |
| ecb_00394 | ybaV | -0.055973399 | 0.960114673 |
| ecb_01554 | ynfC | -0.049433981 | 0.960273401 |
| ecb_02893 | mqsA | 0.05087147   | 0.960273401 |
| ecb_02744 | serA | 0.060648966  | 0.960273401 |
| ecb_02764 | cmrB | 0.074853607  | 0.960273401 |
| ecb_02848 | glcD | 0.064099365  | 0.960273401 |
| ecb_02146 | atoS | 0.066210878  | 0.960273401 |
| ecb_02941 | aer  | -0.047937137 | 0.960273401 |
| ecb_01270 | sapB | 0.061867765  | 0.960273401 |
| ecb_03432 | lyxK | 0.077207642  | 0.960273401 |
| ecb_00946 | ycbU | -0.047886681 | 0.960273401 |
| ecb_02682 | tas  | 0.041382232  | 0.960273401 |
| ecb_01778 | yoaA | 0.08762754   | 0.960273401 |
| ecb_03536 | insI | 0.05973359   | 0.960273401 |
| ecb_03031 | pnp  | 0.043083857  | 0.960273401 |
| ecb_03970 | phnJ | -0.073410981 | 0.960273401 |
| ecb_00076 | leuA | 0.068010722  | 0.960273401 |
| ecb_03072 | yrbL | 0.043675647  | 0.960273401 |
| ecb_04210 | yjiV | 0.058693337  | 0.960273401 |
| ecb_00293 | cynT | 0.054085148  | 0.960273401 |
| ecb_04078 | ytfB | -0.051248047 | 0.960273401 |
| ecb_01053 | yceJ | 0.054191618  | 0.960273401 |
| ecb_02244 | usg  | 0.089781859  | 0.960273401 |
| ecb_01412 | yncH | -0.185819945 | 0.960273401 |
| ecb_01381 | opgD | 0.053290021  | 0.960273401 |
| ecb_00511 | nohB | -0.07602345  | 0.960396008 |
| ecb_01088 | fabD | 0.051403297  | 0.960529564 |
| ecb_00405 | ybaY | -0.057615494 | 0.960618935 |
| ecb_00724 | ybhJ | 0.058443586  | 0.960618935 |
| ecb_02237 | purF | 0.074924814  | 0.96091     |
| ecb_03971 | phnI | -0.100899107 | 0.96091     |
| ecb_00907 | pflB | 0.043429746  | 0.961019236 |
| ecb_03835 | frwB | 0.118552493  | 0.961180947 |
| ecb_00457 | gcl  | 0.059951018  | 0.961180947 |
| ecb_02796 | yqgA | -0.071325407 | 0.961180947 |
| ecb_01689 | arpB | -0.115674756 | 0.961180947 |
| ecb_03763 | yihQ | 0.068550924  | 0.961180947 |
| ecb_02502 | grpE | -0.093475787 | 0.961180947 |
| ecb_02195 | rbn  | 0.06867198   | 0.961212885 |
| ecb_02545 | yqaB | 0.072777955  | 0.961556209 |
| ecb_02334 | ypeA | -0.053647264 | 0.962142692 |
| ecb_02861 | yghS | 0.088774762  | 0.962142692 |
| ecb_00469 | yIbE | 0.056249748  | 0.962142692 |
| ecb_00294 | cynS | 0.044294626  | 0.962142692 |
| ecb_03620 | atpF | 0.083123496  | 0.962400325 |
| ecb_00576 | uspG | -0.050229525 | 0.962400325 |
| ecb_02114 | yejH | 0.059626618  | 0.962400325 |
| ecb_00586 | citC | 0.061041504  | 0.962400325 |

|           |      |              |             |
|-----------|------|--------------|-------------|
| ecb_01843 | torZ | -0.042441615 | 0.962400325 |
| ecb_02860 | yghR | 0.080254509  | 0.962400325 |
| ecb_02319 | yfeK | -0.082479697 | 0.962400325 |
| ecb_02442 | yphH | 0.090947335  | 0.962400325 |
| ecb_03697 | yigG | -0.072534682 | 0.962400325 |
| ecb_01279 | puuE | -0.067191629 | 0.962400325 |
| ecb_03928 | yjbQ | -0.049748484 | 0.962400325 |
| ecb_01888 | zinT | -0.064350999 | 0.962400325 |
| ecb_01111 | ycfT | 0.095377811  | 0.962400325 |
| ecb_02531 | nrdE | -0.081502635 | 0.962400325 |
| ecb_01489 | marR | -0.04946892  | 0.962400325 |
| ecb_01709 | nadE | -0.05812285  | 0.962400325 |
| ecb_03918 | zur  | 0.061416768  | 0.962400325 |
| ecb_01199 | narL | 0.040417618  | 0.962400325 |
| ecb_00319 | hemB | -0.053276929 | 0.962400325 |
| ecb_00611 | leuS | -0.051840825 | 0.962400325 |
| ecb_02441 | yphG | 0.05441284   | 0.962400325 |
| ecb_00762 | ybhG | 0.074094462  | 0.962400325 |
| ecb_03804 | tpiA | -0.051892871 | 0.962400325 |
| ecb_03645 | ilvL | 0.089957468  | 0.962400325 |
| ecb_01080 | rne  | 0.049290912  | 0.962400325 |
| ecb_00967 | mgsA | 0.065404031  | 0.962400325 |
| ecb_00604 | mrda | -0.046849097 | 0.962400325 |
| ecb_02029 | yegW | -0.052777249 | 0.962400325 |
| ecb_01703 | chbF | 0.055590988  | 0.962400325 |
| ecb_00304 | mhpD | -0.046624695 | 0.962400325 |
| ecb_03919 | yjbL | 0.111975006  | 0.962400325 |
| ecb_03463 | lldD | -0.079966336 | 0.962400325 |
| ecb_03629 | viaA | -0.068372908 | 0.962400325 |
| ecb_01308 | ynal | 0.058634089  | 0.962400325 |
| ecb_01877 | pgsA | 0.051446142  | 0.962400325 |
| ecb_00540 | ybdF | -0.045545497 | 0.962400325 |
| ecb_01190 | kdsA | -0.075976461 | 0.962470806 |
| ecb_00181 | rnhB | -0.046054417 | 0.963020654 |
| ecb_01882 | yedU | 0.067231242  | 0.963020654 |
| ecb_01904 | insD | 0.061492991  | 0.963020654 |
| ecb_03446 | selA | -0.073636806 | 0.963686234 |
| ecb_02180 | arnC | 0.055584549  | 0.963686234 |
| ecb_00778 | glnH | 0.038441367  | 0.964088553 |
| ecb_03174 | gspA | 0.084105948  | 0.964527978 |
| ecb_03160 | rplX | -0.035863437 | 0.964527978 |
| ecb_03444 | yiaY | 0.057298976  | 0.965354573 |
| ecb_00789 | ybiV | -0.051065411 | 0.965527222 |
| ecb_02424 | trmJ | 0.038114606  | 0.965527222 |
| ecb_01646 | lpp  | -0.09680868  | 0.965527222 |
| ecb_00635 | nagB | 0.119329778  | 0.965934653 |
| ecb_01159 | umuC | -0.047401533 | 0.965934653 |
| ecb_00355 | yajC | -0.054046314 | 0.965934653 |
| ecb_01179 | pth  | 0.038686724  | 0.966268465 |
| ecb_02719 | ygfT | 0.064775603  | 0.966268465 |

|           |      |              |             |
|-----------|------|--------------|-------------|
| ecb_02891 | parC | -0.035490554 | 0.966411316 |
| ecb_01706 | chbC | 0.045833833  | 0.966411316 |
| ecb_04189 | fimH | 0.045053588  | 0.966411316 |
| ecb_02585 | ygbI | 0.052380217  | 0.966606599 |
| ecb_00017 | mokC | -0.047661403 | 0.966625203 |
| ecb_00332 | adrA | 0.048378946  | 0.966729249 |
| ecb_02690 | kduD | 0.067169447  | 0.968123145 |
| ecb_02560 | norV | 0.057518827  | 0.968367765 |
| ecb_01725 | ynjD | 0.057004635  | 0.968446458 |
| ecb_00148 | mrcB | 0.061150443  | 0.968446458 |
| ecb_02152 | yfaP | 0.057669579  | 0.968446458 |
| ecb_01484 | yneK | 0.091207979  | 0.968446458 |
| ecb_01364 | ynbB | 0.073797193  | 0.968446458 |
| ecb_04232 | tsr  | 0.039202978  | 0.968446458 |
| ecb_04116 | bdcA | 0.088458596  | 0.968495254 |
| ecb_03199 | slyX | -0.056949154 | 0.968495254 |
| ecb_01090 | acpP | 0.044465491  | 0.968495254 |
| ecb_02335 | amiA | 0.035980854  | 0.968495254 |
| ecb_02147 | atoC | 0.066570453  | 0.968495254 |
| ecb_03646 | ilvG | -0.051090685 | 0.968495254 |
| ecb_02117 | yejL | 0.040722031  | 0.968495254 |
| ecb_03421 | xyIR | 0.077022222  | 0.968495254 |
| ecb_00047 | fixC | 0.059615356  | 0.968495254 |
| ecb_02765 | tktA | 0.04366211   | 0.968495254 |
| ecb_03945 | nrfD | 0.049203683  | 0.968495254 |
| ecb_01642 | ydhV | 0.060289951  | 0.968495254 |
| ecb_00800 | yliE | 0.052169771  | 0.968700433 |
| ecb_01239 | trpL | 0.069023539  | 0.969047201 |
| ecb_03871 | thiC | -0.05823146  | 0.969047201 |
| ecb_03628 | asnA | 0.058691345  | 0.969047201 |
| ecb_01895 | yeeN | -0.063930989 | 0.969047201 |
| ecb_01326 | recT | 0.059688183  | 0.969466768 |
| ecb_00719 | ybhA | 0.047903454  | 0.969466768 |
| ecb_02641 | sdaC | -0.066803167 | 0.969466768 |
| ecb_01037 | csgD | 0.050511899  | 0.969466768 |
| ecb_03953 | mdtO | 0.062800119  | 0.969466768 |
| ecb_03369 | yhjC | 0.065126669  | 0.969466768 |
| ecb_01312 | ogt  | -0.051479831 | 0.969466768 |
| ecb_03555 | ilvB | -0.060163567 | 0.969466768 |
| ecb_03403 | ghrB | -0.042878288 | 0.969466768 |
| ecb_00750 | moaC | -0.035804112 | 0.969466768 |
| ecb_03498 | slmA | -0.08073034  | 0.969466768 |
| ecb_01543 | dicB | 0.090698327  | 0.969466768 |
| ecb_01428 | yddJ | 0.113070981  | 0.969466768 |
| ecb_01776 | yeaY | -0.03811304  | 0.969466768 |
| ecb_01351 | hslJ | 0.042762558  | 0.969466768 |
| ecb_00584 | citE | 0.059151576  | 0.969466768 |
| ecb_01501 | ydfI | 0.046373884  | 0.969466768 |
| ecb_00601 | dacA | 0.036203859  | 0.969466768 |
| ecb_02931 | ttdA | 0.062450836  | 0.969466768 |

|           |      |              |             |
|-----------|------|--------------|-------------|
| ecb_03806 | yiiR | 0.064432272  | 0.969466768 |
| ecb_02413 | sseA | -0.058611274 | 0.969466768 |
| ecb_01672 | ppsR | -0.0430177   | 0.969466768 |
| ecb_00787 | ybiT | -0.042194682 | 0.969466768 |
| ecb_03561 | yidl | -0.041120824 | 0.969466768 |
| ecb_00495 | ybcL | -0.065386731 | 0.969466768 |
| ecb_03318 | zntA | -0.070874977 | 0.969466768 |
| ecb_02898 | qseC | 0.043511117  | 0.96954144  |
| ecb_04043 | yjeT | -0.04778346  | 0.969997706 |
| ecb_00232 | pepD | -0.071994785 | 0.969997706 |
| ecb_00933 | ompF | -0.031141677 | 0.970504682 |
| ecb_03866 | thiH | -0.054946745 | 0.970504682 |
| ecb_01224 | kch  | -0.051240842 | 0.970504682 |
| ecb_02934 | tsaD | -0.041373742 | 0.970504682 |
| ecb_01151 | minC | -0.041474838 | 0.970504682 |
| ecb_00201 | yafC | 0.058636812  | 0.971081075 |
| ecb_03943 | nrfB | -0.043623673 | 0.971280564 |
| ecb_01944 | rfbC | -0.058280873 | 0.971384098 |
| ecb_02148 | atoD | 0.056671649  | 0.971783149 |
| ecb_03453 | yibl | 0.050291259  | 0.971914943 |
| ecb_03093 | yhcB | 0.054892319  | 0.97267065  |
| ecb_01157 | hlyE | -0.076660181 | 0.972698079 |
| ecb_02222 | pta  | -0.084278173 | 0.972698079 |
| ecb_01398 | ydcT | 0.060837328  | 0.972698079 |
| ecb_03506 | rpoZ | 0.033838922  | 0.972698079 |
| ecb_03830 | yijF | -0.055679551 | 0.973387351 |
| ecb_01385 | ydcK | 0.06062593   | 0.973387351 |
| ecb_03186 | gspO | -0.060748426 | 0.97401874  |
| ecb_00847 | tfaE | 0.047960363  | 0.97401874  |
| ecb_04202 | yjiK | -0.059975753 | 0.97401874  |
| ecb_03750 | yihA | -0.047843634 | 0.97401874  |
| ecb_01189 | yehA | -0.0506984   | 0.97401874  |
| ecb_01476 | tam  | 0.082128569  | 0.97401874  |
| ecb_00980 | hyaF | -0.041862683 | 0.97401874  |
| ecb_00627 | ybeY | 0.0501693    | 0.97401874  |
| ecb_00964 | yccS | 0.050213385  | 0.974142371 |
| ecb_00906 | pflA | 0.035849363  | 0.974246106 |
| ecb_02238 | cvpA | -0.068054634 | 0.975016541 |
| ecb_01544 | ydfD | 0.100398455  | 0.975063381 |
| ecb_00380 | cyoD | 0.037955093  | 0.975063381 |
| ecb_02523 | ygaV | 0.049297905  | 0.975063381 |
| ecb_00606 | rsfS | -0.055391083 | 0.976473524 |
| ecb_02887 | yqhH | 0.068442885  | 0.976473524 |
| ecb_00634 | nagA | 0.094491542  | 0.976473524 |
| ecb_00589 | dpiB | 0.035827349  | 0.976499933 |
| ecb_04103 | pmbA | -0.060893128 | 0.976499933 |
| ecb_00978 | hyaD | -0.055775086 | 0.976674068 |
| ecb_04121 | rraB | 0.045940044  | 0.976795811 |
| ecb_00640 | fur  | 0.029396658  | 0.977001853 |
| ecb_03354 | slp  | 0.076067174  | 0.97758333  |

|           |      |              |             |
|-----------|------|--------------|-------------|
| ecb_03346 | rsmJ | 0.070406667  | 0.97758333  |
| ecb_00421 | dnaX | 0.073258325  | 0.97758333  |
| ecb_00911 | serC | 0.065967397  | 0.97758333  |
| ecb_01276 | puuR | -0.068334516 | 0.97758333  |
| ecb_02462 | lepB | -0.056699232 | 0.97758333  |
| ecb_00896 | rarA | -0.061946151 | 0.97758333  |
| ecb_01429 | yddK | -0.119921397 | 0.97758333  |
| ecb_03854 | birA | 0.055616538  | 0.97758333  |
| ecb_01154 | ycgL | -0.055877367 | 0.97758333  |
| ecb_02437 | yphC | 0.050171089  | 0.97758333  |
| ecb_03774 | yiiE | 0.080289309  | 0.97758333  |
| ecb_03966 | phnN | 0.055495136  | 0.97758333  |
| ecb_01241 | yciO | 0.052943673  | 0.97758333  |
| ecb_01761 | yeaO | 0.058358941  | 0.97758333  |
| ecb_00277 | yahG | 0.050364597  | 0.97758333  |
| ecb_00243 | paoC | 0.06324225   | 0.97758333  |
| ecb_02404 | bamB | -0.081189194 | 0.97758333  |
| ecb_04271 | ytjC | 0.052115281  | 0.97758333  |
| ecb_02351 | eutQ | 0.044053459  | 0.97758333  |
| ecb_00162 | yaeH | 0.044158219  | 0.977653181 |
| ecb_00281 | yahL | -0.074586959 | 0.977653181 |
| ecb_02398 | yfgl | -0.049961848 | 0.977653181 |
| ecb_03997 | yjdl | 0.059258388  | 0.977653181 |
| ecb_00167 | rpsB | -0.031995827 | 0.977653181 |
| ecb_03149 | rpsM | 0.029310926  | 0.977653181 |
| ecb_02648 | fucA | 0.061122227  | 0.977653181 |
| ecb_03896 | lysC | 0.033478996  | 0.977653181 |
| ecb_00242 | paoD | -0.045151633 | 0.977653181 |
| ecb_04279 | yjtD | 0.0307958    | 0.977653181 |
| ecb_01457 | ydeO | 0.076104844  | 0.977653181 |
| ecb_02497 | rimM | -0.039140841 | 0.977653181 |
| ecb_00613 | ybeQ | 0.04409963   | 0.977653181 |
| ecb_03442 | yiaW | 0.038726259  | 0.977653181 |
| ecb_03201 | kefB | -0.048697727 | 0.977653181 |
| ecb_02354 | maeB | -0.066201297 | 0.977653181 |
| ecb_01968 | wza  | 0.054535962  | 0.977653181 |
| ecb_03322 | yhhS | 0.044428943  | 0.977653181 |
| ecb_01469 | hipA | 0.07889      | 0.977653181 |
| ecb_00444 | ybbO | -0.038816515 | 0.977653181 |
| ecb_01632 | cfa  | 0.036156607  | 0.977653181 |
| ecb_02416 | iscX | -0.032843591 | 0.977653181 |
| ecb_02257 | yfcO | 0.032812674  | 0.977653181 |
| ecb_02635 | yqcA | -0.074764106 | 0.977653181 |
| ecb_00362 | ribD | 0.079018036  | 0.977653181 |
| ecb_02911 | ygiD | 0.039843668  | 0.977653181 |
| ecb_01160 | dsbB | -0.048949228 | 0.977653181 |
| ecb_03968 | phnL | -0.079772911 | 0.977653181 |
| ecb_03689 | uvrD | -0.052469112 | 0.977653181 |
| ecb_04057 | yjfp | -0.02957822  | 0.977653181 |
| ecb_01001 | torD | 0.037717935  | 0.977653181 |

|           |      |              |             |
|-----------|------|--------------|-------------|
| ecb_03776 | fdhE | 0.083100039  | 0.977653181 |
| ecb_00120 | speE | 0.049089484  | 0.977653181 |
| ecb_01175 | dhaK | -0.060113229 | 0.977653181 |
| ecb_02449 | purL | -0.105370092 | 0.977653181 |
| ecb_02529 | nrhH | 0.050684144  | 0.977653181 |
| ecb_02667 | recD | 0.049098616  | 0.977653181 |
| ecb_02567 | hycl | -0.049032704 | 0.977653181 |
| ecb_02202 | nuoM | 0.080505084  | 0.977653181 |
| ecb_03508 | trmH | 0.071347346  | 0.977653181 |
| ecb_00117 | acnB | 0.064371164  | 0.977653181 |
| ecb_03323 | yhhT | 0.060317663  | 0.977653181 |
| ecb_03150 | rpmJ | 0.051836344  | 0.977653181 |
| ecb_02448 | glrK | 0.055598881  | 0.977653181 |
| ecb_02158 | ubiG | -0.052040114 | 0.977653181 |
| ecb_01752 | yeaG | 0.047442202  | 0.977653181 |
| ecb_00969 | yccU | -0.038498863 | 0.977653181 |
| ecb_02027 | yegU | -0.041021929 | 0.977653181 |
| ecb_01629 | purR | -0.035401093 | 0.977653181 |
| ecb_01371 | gapC | 0.056258303  | 0.977653181 |
| ecb_02991 | garL | 0.056491845  | 0.977653181 |
| ecb_03767 | yihU | -0.049184402 | 0.977653181 |
| ecb_02504 | recN | -0.049809193 | 0.977653181 |
| ecb_00485 | fimZ | 0.066328979  | 0.977653181 |
| ecb_01204 | narJ | -0.048212058 | 0.977653181 |
| ecb_00696 | ybgC | 0.035454846  | 0.977653181 |
| ecb_01844 | torY | 0.040448504  | 0.977653181 |
| ecb_03826 | metL | 0.053851405  | 0.977653181 |
| ecb_00136 | yadL | -0.053819468 | 0.977653181 |
| ecb_03747 | yihF | -0.060779711 | 0.977653181 |
| ecb_00721 | ybhD | 0.058161903  | 0.977653181 |
| ecb_01485 | ydeA | 0.068639303  | 0.977653181 |
| ecb_00471 | ybcF | -0.04617422  | 0.977653181 |
| ecb_02550 | pncC | -0.037021661 | 0.977653181 |
| ecb_00929 | ycbB | 0.039933754  | 0.977653181 |
| ecb_02465 | rseB | 0.048247417  | 0.977653181 |
| ecb_03868 | thiS | 0.061586663  | 0.977653181 |
| ecb_03164 | rplP | -0.034093152 | 0.977653181 |
| ecb_02446 | glrR | 0.032551879  | 0.977737789 |
| ecb_02460 | era  | 0.04289018   | 0.977737789 |
| ecb_00247 | ykgJ | -0.034584975 | 0.977737789 |
| ecb_03361 | mdtE | 0.074645702  | 0.977737789 |
| ecb_01227 | yciA | -0.047660296 | 0.977737789 |
| ecb_02687 | lysR | 0.052055443  | 0.977737789 |
| ecb_03663 | wzzE | -0.037432749 | 0.977737789 |
| ecb_00048 | fixX | 0.043689495  | 0.977737789 |
| ecb_02977 | yhaM | 0.035854823  | 0.977737789 |
| ecb_03020 | yhbO | -0.033694945 | 0.977737789 |
| ecb_04059 | ulaG | 0.03356853   | 0.977737789 |
| ecb_00116 | yacH | -0.04960645  | 0.977737789 |
| ecb_03297 | yhhA | 0.046892845  | 0.977737789 |

|           |      |              |             |
|-----------|------|--------------|-------------|
| ecb_03946 | nrfE | -0.051050666 | 0.977737789 |
| ecb_01573 | ydgH | 0.029063731  | 0.977737789 |
| ecb_02525 | stpA | 0.041873815  | 0.977737789 |
| ecb_02668 | recB | 0.058883869  | 0.977737789 |
| ecb_01901 | cobS | -0.048067196 | 0.977737789 |
| ecb_02520 | csiR | 0.032847945  | 0.977737789 |
| ecb_01803 | msrC | 0.063887907  | 0.977737789 |
| ecb_00173 | cdsA | -0.047879772 | 0.977737789 |
| ecb_00551 | fes  | -0.053107445 | 0.977737789 |
| ecb_01409 | yncE | 0.056773455  | 0.977737789 |
| ecb_00087 | murF | -0.070463588 | 0.977737789 |
| ecb_03370 | yhjD | 0.048909453  | 0.977890069 |
| ecb_02644 | fucO | 0.03947559   | 0.977890069 |
| ecb_02728 | cptA | 0.052848845  | 0.977890069 |
| ecb_00903 | ycaM | 0.033594643  | 0.978081505 |
| ecb_00897 | serS | -0.026935987 | 0.97821704  |
| ecb_03104 | tldD | -0.029279379 | 0.978973338 |
| ecb_01303 | mpaA | 0.044204069  | 0.978973338 |
| ecb_03900 | yjbG | -0.071507387 | 0.979098412 |
| ecb_00274 | yahD | 0.042047829  | 0.979098412 |
| ecb_01699 | ydjO | 0.070296303  | 0.979098412 |
| ecb_03163 | rpmC | -0.039555542 | 0.979098412 |
| ecb_04081 | ytfE | 0.062080803  | 0.979098412 |
| ecb_00174 | rseP | -0.039954518 | 0.979225265 |
| ecb_02384 | focB | -0.034573408 | 0.979255941 |
| ecb_00509 | ybcU | -0.12484843  | 0.979255941 |
| ecb_03603 | yieL | 0.042126425  | 0.979691269 |
| ecb_00037 | carB | 0.063283346  | 0.979691269 |
| ecb_01357 | feaB | -0.03415216  | 0.979691269 |
| ecb_02546 | csrA | 0.02965325   | 0.979691269 |
| ecb_04132 | idnO | 0.044492308  | 0.979691269 |
| ecb_03880 | zraS | 0.040083799  | 0.979691269 |
| ecb_02253 | mepA | 0.041346202  | 0.979691269 |
| ecb_00393 | ppiD | 0.026086161  | 0.979691269 |
| ecb_01669 | ydiT | 0.045737444  | 0.979691269 |
| ecb_01268 | sapD | 0.036487797  | 0.979691269 |
| ecb_03684 | yifL | 0.036358822  | 0.979691269 |
| ecb_01447 | dosP | 0.054893665  | 0.979691269 |
| ecb_03601 | cbrC | -0.038147468 | 0.979691269 |
| ecb_04091 | tamA | 0.044593237  | 0.979691269 |
| ecb_01721 | ydjZ | -0.036176461 | 0.979691269 |
| ecb_04278 | yjjY | 0.104306352  | 0.979691269 |
| ecb_01319 | ydaN | 0.040765167  | 0.979691269 |
| ecb_00196 | metQ | 0.040654412  | 0.979691269 |
| ecb_02884 | yqhD | 0.043498965  | 0.979691269 |
| ecb_01607 | tyrS | -0.046010164 | 0.979691269 |
| ecb_03110 | mreB | 0.026969191  | 0.979691269 |
| ecb_03159 | rplE | -0.025684463 | 0.979691269 |
| ecb_01969 | yegH | -0.042443683 | 0.979691269 |
| ecb_01711 | ves  | -0.037101641 | 0.979691269 |

|           |      |              |             |
|-----------|------|--------------|-------------|
| ecb_02403 | der  | -0.052260027 | 0.979691269 |
| ecb_00302 | mhpB | -0.044395168 | 0.979691269 |
| ecb_02431 | hcaF | -0.032843621 | 0.979691269 |
| ecb_01738 | ydjE | -0.046345344 | 0.979691269 |
| ecb_02113 | rsuA | 0.033251624  | 0.979691269 |
| ecb_00323 | ampH | 0.046540127  | 0.979691269 |
| ecb_03679 | hemD | -0.043931419 | 0.979691269 |
| ecb_03289 | gntR | 0.056005505  | 0.979691269 |
| ecb_03841 | ppc  | -0.035741486 | 0.979691269 |
| ecb_00610 | lptE | -0.055313651 | 0.979691269 |
| ecb_03360 | yhiE | -0.073855284 | 0.979691269 |
| ecb_00699 | tolA | -0.046404495 | 0.979691269 |
| ecb_01622 | rnt  | 0.028378885  | 0.979691269 |
| ecb_01856 | tap  | 0.035566915  | 0.979691269 |
| ecb_03145 | rplQ | 0.034308872  | 0.979691269 |
| ecb_03472 | yibQ | 0.034531794  | 0.979691269 |
| ecb_00250 | ecpC | 0.036807916  | 0.979691269 |
| ecb_01640 | ydhX | 0.044324901  | 0.979691269 |
| ecb_02770 | yqgC | -0.057361011 | 0.979691269 |
| ecb_01619 | ydhM | 0.057224819  | 0.979691269 |
| ecb_03801 | pfkA | -0.034122887 | 0.979691269 |
| ecb_04238 | dnaC | -0.031705658 | 0.979691269 |
| ecb_00392 | hupB | -0.051781294 | 0.979691269 |
| ecb_01414 | rhsE | -0.058775048 | 0.979691269 |
| ecb_02259 | yfcQ | -0.066157586 | 0.979691269 |
| ecb_03466 | gpsA | 0.040154762  | 0.979691269 |
| ecb_00938 | ssuC | -0.02981332  | 0.979691269 |
| ecb_00251 | ecpB | -0.044646792 | 0.979691269 |
| ecb_02886 | yqhG | 0.050067758  | 0.979691269 |
| ecb_00259 | rclB | 0.069694986  | 0.979691269 |
| ecb_03152 | rplO | -0.02388949  | 0.979691269 |
| ecb_03932 | yjcB | 0.092268895  | 0.979691269 |
| ecb_02081 | yeiB | -0.043793382 | 0.979691269 |
| ecb_02178 | ais  | 0.033485595  | 0.979691269 |
| ecb_02463 | lepA | 0.044243641  | 0.979691269 |
| ecb_03792 | rhaR | -0.058852027 | 0.979691269 |
| ecb_03505 | gmk  | 0.033291006  | 0.979691269 |
| ecb_02839 | yghF | -0.041089918 | 0.979691269 |
| ecb_01084 | yceD | -0.034591145 | 0.979691269 |
| ecb_02593 | pcm  | 0.038016111  | 0.979691269 |
| ecb_00105 | hofC | -0.042504621 | 0.979691269 |
| ecb_00955 | pqiB | 0.034477201  | 0.979691269 |
| ecb_03079 | yhcG | -0.04464039  | 0.979691269 |
| ecb_01972 | udk  | 0.028919051  | 0.979691269 |
| ecb_00470 | ylbF | 0.044981452  | 0.979691269 |
| ecb_02877 | yqhA | -0.027493968 | 0.979691269 |
| ecb_00255 | ykgM | -0.037429767 | 0.979691269 |
| ecb_00791 | ybiY | 0.036640689  | 0.979691269 |
| ecb_01262 | gmr  | -0.027591204 | 0.979691269 |
| ecb_02866 | hybG | 0.061027766  | 0.979691269 |



|           |      |              |             |
|-----------|------|--------------|-------------|
| ecb_03462 | lldR | -0.06137404  | 0.979691269 |
| ecb_02900 | mdaB | 0.03993104   | 0.979691269 |
| ecb_00389 | clpX | 0.032457604  | 0.979691269 |
| ecb_00987 | gfcD | 0.034479911  | 0.979691269 |
| ecb_03262 | feoC | -0.063828921 | 0.979691269 |
| ecb_02568 | hycH | 0.026789776  | 0.979691269 |
| ecb_02882 | yghB | 0.040372291  | 0.979691269 |
| ecb_04047 | rlmB | 0.05206258   | 0.979691269 |
| ecb_03417 | xylA | 0.042962328  | 0.979691269 |
| ecb_02541 | emrB | 0.044440831  | 0.979691269 |
| ecb_00769 | ybiJ | -0.05934291  | 0.979691269 |
| ecb_03784 | frvB | -0.039084134 | 0.979691269 |
| ecb_03974 | phnF | -0.068411114 | 0.979691269 |
| ecb_00396 | queC | -0.035611982 | 0.979691269 |
| ecb_00226 | dinB | -0.035802697 | 0.979691269 |
| ecb_00858 | ybjN | -0.036542181 | 0.979691269 |
| ecb_03440 | yiaU | -0.033848284 | 0.979691269 |
| ecb_03557 | emrD | 0.037889539  | 0.979691269 |
| ecb_01745 | ydjL | 0.033113198  | 0.979691269 |
| ecb_01612 | slyA | -0.044354849 | 0.979691269 |
| ecb_04015 | yjeJ | 0.063734691  | 0.979691269 |
| ecb_03858 | nusG | -0.063923257 | 0.979691269 |
| ecb_00240 | proA | 0.070591865  | 0.979691269 |
| ecb_00784 | mntR | -0.051033522 | 0.979691269 |
| ecb_01214 | tdk  | 0.050853989  | 0.979691269 |
| ecb_02829 | yghD | -0.02874433  | 0.979691269 |
| ecb_04053 | yjfC | 0.043266235  | 0.979691269 |
| ecb_02929 | ygiH | 0.046350453  | 0.979691269 |
| ecb_03861 | rplJ | -0.025992136 | 0.979691269 |
| ecb_01753 | yeaH | -0.033513893 | 0.979691269 |
| ecb_00379 | cyoE | -0.032047726 | 0.979691269 |
| ecb_03582 | gyrB | 0.028591198  | 0.979691269 |
| ecb_01200 | narX | 0.030442853  | 0.979691269 |
| ecb_00652 | kdpD | 0.030161944  | 0.979691269 |
| ecb_01358 | tynA | 0.034450181  | 0.979788316 |
| ecb_03418 | xylF | 0.060310247  | 0.979842971 |
| ecb_02561 | norW | -0.034864285 | 0.979842971 |
| ecb_00674 | nei  | 0.032276621  | 0.979842971 |
| ecb_01325 | ralR | -0.05954296  | 0.979842971 |
| ecb_01886 | yedY | -0.038186247 | 0.979842971 |
| ecb_00065 | araB | 0.034344032  | 0.979842971 |
| ecb_02474 | ung  | 0.039092279  | 0.979842971 |
| ecb_00455 | allA | 0.03491394   | 0.979842971 |
| ecb_03014 | lpoA | -0.038835762 | 0.979842971 |
| ecb_02433 | hcaB | -0.037640141 | 0.979842971 |
| ecb_03577 | dgok | 0.028848785  | 0.979880619 |
| ecb_02409 | rlmN | -0.034624052 | 0.979880619 |
| ecb_01889 | yodB | 0.045855521  | 0.979880619 |
| ecb_02679 | mutH | -0.051513139 | 0.979880619 |
| ecb_02872 | hybA | 0.056106843  | 0.979880619 |

|           |      |              |             |
|-----------|------|--------------|-------------|
| ecb_03884 | yjaB | -0.026504653 | 0.979880619 |
| ecb_03383 | yhjR | 0.02937643   | 0.979880619 |
| ecb_04119 | yjgI | 0.029331081  | 0.979880619 |
| ecb_02774 | yggI | -0.030238021 | 0.979880619 |
| ecb_02935 | rpsU | 0.056863039  | 0.979880619 |
| ecb_03556 | ivbL | -0.080492622 | 0.979880619 |
| ecb_02292 | ypdC | -0.038498288 | 0.979880619 |
| ecb_01332 | ydaF | 0.045639478  | 0.979880619 |
| ecb_01971 | dcd  | 0.031794836  | 0.979880619 |
| ecb_01962 | wcaD | -0.04765966  | 0.979880619 |
| ecb_01181 | dauA | -0.039617513 | 0.979880619 |
| ecb_00701 | pal  | -0.02607509  | 0.979880619 |
| ecb_00431 | ushA | -0.03698265  | 0.979880619 |
| ecb_00305 | mhpF | 0.029453281  | 0.979880619 |
| ecb_00764 | rhIE | -0.048753781 | 0.979880619 |
| ecb_00609 | hoIA | 0.033667784  | 0.979880619 |
| ecb_03009 | yraH | -0.045583135 | 0.979880619 |
| ecb_03592 | tnaA | 0.047073427  | 0.979880619 |
| ecb_03950 | yjcO | -0.039220047 | 0.979880619 |
| ecb_02201 | nuoN | -0.044936557 | 0.979880619 |
| ecb_04041 | hfIK | 0.032523785  | 0.979880619 |
| ecb_00522 | nfrA | 0.03553354   | 0.979880619 |
| ecb_02294 | ypdE | 0.033575959  | 0.979880619 |
| ecb_03296 | ggt  | 0.027805483  | 0.979880619 |
| ecb_03931 | ssb  | -0.038556451 | 0.980247241 |
| ecb_03701 | recQ | -0.045005512 | 0.980451976 |
| ecb_00018 | nhaA | -0.037724312 | 0.980451976 |
| ecb_04125 | hoIC | -0.026690012 | 0.980519033 |
| ecb_00228 | yafO | -0.034702243 | 0.980633623 |
| ecb_01809 | pphA | -0.035735612 | 0.980633623 |
| ecb_03686 | yigA | 0.033541835  | 0.980990035 |
| ecb_03208 | crp  | 0.029241962  | 0.980990035 |
| ecb_02456 | yfhL | 0.036545832  | 0.980990035 |
| ecb_00238 | phoE | 0.029499067  | 0.980990035 |
| ecb_00753 | ybhL | 0.036560628  | 0.980990035 |
| ecb_01606 | pdxY | -0.028877382 | 0.980990035 |
| ecb_01377 | mokB | 0.056739411  | 0.980990035 |
| ecb_02205 | nuoJ | -0.025784613 | 0.980990035 |
| ecb_03965 | phnO | -0.040844808 | 0.981195999 |
| ecb_01168 | emtA | -0.037787693 | 0.981250965 |
| ecb_02074 | yeiS | -0.027167481 | 0.981380746 |
| ecb_00450 | yIbH | -0.028084819 | 0.981380746 |
| ecb_03902 | psiE | -0.042255226 | 0.981380746 |
| ecb_02145 | rccC | -0.030493039 | 0.981380746 |
| ecb_01736 | ansA | 0.035162161  | 0.981380746 |
| ecb_01092 | pabC | 0.031476911  | 0.981380746 |
| ecb_00864 | rlmC | -0.052890855 | 0.981380746 |
| ecb_01186 | prfA | -0.030403958 | 0.981380746 |
| ecb_04052 | yjFM | 0.033799918  | 0.981380746 |
| ecb_00605 | rlmH | -0.025332511 | 0.981380746 |

|           |      |              |             |
|-----------|------|--------------|-------------|
| ecb_02636 | truC | -0.024414888 | 0.981380746 |
| ecb_00673 | ybgL | -0.042175317 | 0.981380746 |
| ecb_01814 | yobB | -0.043784319 | 0.981380746 |
| ecb_03818 | ftsN | -0.03268026  | 0.981380746 |
| ecb_02936 | dnaG | -0.046042676 | 0.981380746 |
| ecb_00577 | ybdR | 0.024226401  | 0.981380746 |
| ecb_03864 | rpoC | 0.02511257   | 0.981380746 |
| ecb_00645 | pgm  | -0.02448702  | 0.981380746 |
| ecb_00153 | hemL | 0.043757605  | 0.981380746 |
| ecb_01249 | yciN | 0.030651816  | 0.981380746 |
| ecb_02227 | yfcG | -0.029534407 | 0.981380746 |
| ecb_01559 | ynfH | 0.03161453   | 0.981380746 |
| ecb_01896 | yeeO | -0.035433647 | 0.981380746 |
| ecb_03191 | fusA | 0.021180399  | 0.981380746 |
| ecb_03465 | cysE | -0.034084368 | 0.981380746 |
| ecb_02067 | yohF | 0.032584056  | 0.981380746 |
| ecb_03595 | yidZ | -0.035025044 | 0.981380746 |
| ecb_02300 | ypeC | -0.034625578 | 0.981380746 |
| ecb_03564 | yidL | 0.048477723  | 0.981380746 |
| ecb_01228 | yciB | 0.029098085  | 0.981380746 |
| ecb_03879 | zraP | 0.037357301  | 0.981380746 |
| ecb_02073 | sanA | 0.030340909  | 0.981380746 |
| ecb_01769 | dmlR | -0.049769563 | 0.981380746 |
| ecb_03967 | phnM | 0.040987657  | 0.981380746 |
| ecb_01956 | wcal | 0.032128321  | 0.981380746 |
| ecb_02987 | yhaB | 0.049542122  | 0.981380746 |
| ecb_01161 | nhaB | 0.030880731  | 0.981380746 |
| ecb_00275 | yahE | 0.02801744   | 0.981380746 |
| ecb_03617 | atpG | 0.033320486  | 0.981380746 |
| ecb_04216 | hsdR | -0.037418939 | 0.981380746 |
| ecb_00190 | arfB | 0.028679274  | 0.981380746 |
| ecb_03172 | rpsJ | 0.021240631  | 0.981450428 |
| ecb_01289 | ycjP | 0.035005066  | 0.981722945 |
| ecb_02551 | mltB | 0.054206295  | 0.981722945 |
| ecb_01145 | ycgH | 0.036106553  | 0.981722945 |
| ecb_00044 | caiT | 0.036002863  | 0.981722945 |
| ecb_00387 | tig  | 0.033749216  | 0.981722945 |
| ecb_04105 | nrdG | -0.033517155 | 0.981722945 |
| ecb_00158 | mtn  | -0.025843976 | 0.981722945 |
| ecb_01477 | yneE | 0.060384704  | 0.981722945 |
| ecb_02669 | ptrA | 0.030796241  | 0.981722945 |
| ecb_03791 | rhaS | 0.056448886  | 0.981722945 |
| ecb_04079 | fkIB | -0.023589363 | 0.981722945 |
| ecb_03748 | yihG | -0.02967303  | 0.981722945 |
| ecb_00164 | dapD | -0.02972536  | 0.981722945 |
| ecb_01621 | gloA | 0.027772816  | 0.981722945 |
| ecb_02436 | yphB | 0.023066102  | 0.981722945 |
| ecb_00399 | ybaO | -0.031073584 | 0.981722945 |
| ecb_00775 | ybiO | -0.026655606 | 0.981722945 |
| ecb_00671 | ybgJ | 0.022933716  | 0.981722945 |

|           |      |              |             |
|-----------|------|--------------|-------------|
| ecb_00411 | hha  | 0.024227347  | 0.982121281 |
| ecb_00409 | ylaC | 0.02509728   | 0.982121281 |
| ecb_03443 | aldB | 0.04746351   | 0.982148436 |
| ecb_01737 | pncA | 0.020264595  | 0.982371469 |
| ecb_01282 | pspB | -0.042605008 | 0.982420885 |
| ecb_02930 | ttdR | 0.036548885  | 0.982420885 |
| ecb_00333 | proC | 0.031835015  | 0.982622217 |
| ecb_03787 | rhaM | 0.03314004   | 0.982953856 |
| ecb_01197 | ychN | 0.042468727  | 0.982953856 |
| ecb_02343 | eutH | 0.031291401  | 0.983162532 |
| ecb_03543 | yicL | 0.027236856  | 0.983470389 |
| ecb_02530 | nrdI | -0.027383699 | 0.983470389 |
| ecb_01006 | yccJ | -0.047826019 | 0.983470389 |
| ecb_00361 | nrdR | -0.019283307 | 0.983470389 |
| ecb_01857 | tar  | 0.026304748  | 0.983470389 |
| ecb_00773 | mcbA | 0.031955394  | 0.983470389 |
| ecb_01549 | rspB | 0.024309186  | 0.983470389 |
| ecb_03978 | yjdN | -0.042280634 | 0.983470389 |
| ecb_03012 | yraK | 0.025430468  | 0.983470389 |
| ecb_03365 | gadA | 0.041034076  | 0.983470389 |
| ecb_03433 | sgbH | -0.022233144 | 0.983470389 |
| ecb_03338 | yhiJ | 0.027078516  | 0.983470389 |
| ecb_02136 | eco  | 0.036371794  | 0.983470389 |
| ecb_00924 | elyC | 0.035239535  | 0.983470389 |
| ecb_00233 | gpt  | -0.031610292 | 0.983470389 |
| ecb_01815 | exoX | -0.025237947 | 0.983470389 |
| ecb_02758 | epd  | -0.022955701 | 0.983470389 |
| ecb_01403 | ydcY | -0.039437812 | 0.983470389 |
| ecb_02092 | yeiL | -0.030468016 | 0.983470389 |
| ecb_02876 | yghZ | -0.032226134 | 0.983470389 |
| ecb_03685 | dapF | 0.040288846  | 0.983470389 |
| ecb_02927 | bacA | -0.031175679 | 0.983470389 |
| ecb_02757 | pgk  | 0.020213856  | 0.983470389 |
| ecb_00975 | hyaA | 0.020867969  | 0.983470389 |
| ecb_02197 | yfbL | -0.041112255 | 0.983470389 |
| ecb_03961 | rpiR | 0.034604899  | 0.983470389 |
| ecb_00322 | yaiV | 0.032036156  | 0.983470389 |
| ecb_02498 | rpsP | -0.022744216 | 0.983470389 |
| ecb_00856 | nfsA | 0.025118863  | 0.983470389 |
| ecb_03165 | rpsC | -0.017973363 | 0.983470389 |
| ecb_00301 | mhpA | -0.030709141 | 0.983470389 |
| ecb_01742 | ydjI | 0.029409562  | 0.983470389 |
| ecb_02019 | gatB | 0.032508799  | 0.983470389 |
| ecb_01754 | yeal | 0.034691106  | 0.983470389 |
| ecb_03587 | rnpA | 0.039838973  | 0.983470389 |
| ecb_00725 | ybhC | -0.034541352 | 0.983470389 |
| ecb_02349 | eutD | -0.02841704  | 0.983470389 |
| ecb_01277 | puuC | 0.063719579  | 0.983470389 |
| ecb_01036 | csgE | -0.04463682  | 0.983470389 |
| ecb_03021 | yhbP | -0.032476844 | 0.983470389 |

|           |      |              |             |
|-----------|------|--------------|-------------|
| ecb_00456 | allR | 0.025465206  | 0.983470389 |
| ecb_02276 | dsdA | -0.037608317 | 0.983470389 |
| ecb_01433 | fdnH | 0.041021033  | 0.983470389 |
| ecb_03981 | yjcZ | 0.031758955  | 0.983470389 |
| ecb_01261 | yciT | -0.039881745 | 0.983470389 |
| ecb_00629 | miaB | -0.038324235 | 0.983470389 |
| ecb_03449 | yibA | -0.042582431 | 0.983470389 |
| ecb_01324 | rcbA | -0.065664688 | 0.983470389 |
| ecb_03241 | aroB | -0.026560674 | 0.983470389 |
| ecb_03752 | hemN | 0.02257663   | 0.983470389 |
| ecb_00616 | hscC | 0.024738361  | 0.983470389 |
| ecb_02657 | rlmM | 0.022206334  | 0.983470389 |
| ecb_00442 | fetB | 0.019987161  | 0.983470389 |
| ecb_03158 | rpsN | -0.01816735  | 0.983470389 |
| ecb_02922 | rfaE | 0.04058392   | 0.983470389 |
| ecb_03999 | ghoS | 0.050588439  | 0.983470389 |
| ecb_02154 | yfaS | 0.025764998  | 0.983470389 |
| ecb_01393 | ydcP | 0.025120905  | 0.983470389 |
| ecb_03078 | gltD | -0.039783921 | 0.983470389 |
| ecb_02704 | ygeX | 0.039724498  | 0.983470389 |
| ecb_02948 | ygjJ | 0.030373695  | 0.983470389 |
| ecb_02988 | yhaC | -0.046515319 | 0.983470389 |
| ecb_01604 | dtpA | -0.022996291 | 0.983470389 |
| ecb_03070 | rapZ | 0.026046028  | 0.983470389 |
| ecb_01374 | cybB | -0.026288672 | 0.983470389 |
| ecb_00386 | bolA | -0.043680059 | 0.983470389 |
| ecb_02691 | kdul | 0.049020082  | 0.983470389 |
| ecb_01328 | racC | -0.048937613 | 0.983470389 |
| ecb_03951 | fdhF | 0.026748431  | 0.983470389 |
| ecb_00848 | stfE | 0.029305719  | 0.983470389 |
| ecb_03168 | rplB | 0.019316069  | 0.983470389 |
| ecb_02386 | bepA | -0.030821184 | 0.983470389 |
| ecb_02972 | yhaH | -0.031581443 | 0.983470389 |
| ecb_02485 | bamD | 0.021054409  | 0.983470389 |
| ecb_00046 | fixB | -0.023279178 | 0.983470389 |
| ecb_01347 | uspF | 0.053242524  | 0.983470389 |
| ecb_00036 | carA | 0.045390024  | 0.983470389 |
| ecb_03295 | yrhB | 0.0309364    | 0.983470389 |
| ecb_00098 | secM | 0.027151894  | 0.983470389 |
| ecb_00792 | fsaA | 0.026598772  | 0.983470389 |
| ecb_03427 | yiaK | 0.030423061  | 0.983470389 |
| ecb_01961 | wcaE | -0.038378406 | 0.983470389 |
| ecb_00298 | lacZ | 0.038423637  | 0.983470389 |
| ecb_03368 | yhjB | -0.026547169 | 0.983568565 |
| ecb_00531 | cusS | 0.037630199  | 0.983568565 |
| ecb_02426 | yfhR | -0.037099827 | 0.983568565 |
| ecb_02417 | fdx  | -0.044037596 | 0.983568565 |
| ecb_01094 | tmk  | 0.022718853  | 0.983568565 |
| ecb_03755 | glnA | -0.02440758  | 0.983568565 |
| ecb_04106 | nrdD | 0.030345595  | 0.983579146 |

|           |      |              |             |
|-----------|------|--------------|-------------|
| ecb_02740 | pepP | 0.049360418  | 0.984151794 |
| ecb_02405 | yfgM | -0.053021234 | 0.984151794 |
| ecb_01839 | yecE | -0.02820207  | 0.984554627 |
| ecb_02710 | mocA | 0.035505222  | 0.984637297 |
| ecb_00356 | secD | -0.027758203 | 0.984637297 |
| ecb_03209 | yhfK | 0.03714845   | 0.985437564 |
| ecb_03467 | secB | -0.017795777 | 0.985437564 |
| ecb_02414 | sseB | -0.035903054 | 0.985437564 |
| ecb_03578 | dgoR | -0.024418361 | 0.985564467 |
| ecb_01638 | ydhT | 0.021866281  | 0.985564467 |
| ecb_00797 | gsiB | 0.024837772  | 0.985564467 |
| ecb_01726 | ynjE | -0.057914744 | 0.985564467 |
| ecb_00412 | tomB | 0.019563979  | 0.985564467 |
| ecb_04046 | rnr  | -0.03340372  | 0.985564467 |
| ecb_03571 | yidQ | -0.021809949 | 0.985564467 |
| ecb_03413 | wecH | 0.032971826  | 0.985564467 |
| ecb_00756 | clsB | -0.020732684 | 0.985564467 |
| ecb_00486 | intD | 0.027653423  | 0.985606489 |
| ecb_00373 | panE | -0.019085694 | 0.985606489 |
| ecb_02464 | rseC | -0.035462414 | 0.985606489 |
| ecb_03170 | rpID | 0.016213552  | 0.985606489 |
| ecb_02741 | ygfB | 0.017146459  | 0.985606489 |
| ecb_00954 | pqiA | -0.020561215 | 0.985618684 |
| ecb_02617 | ygcU | 0.025978052  | 0.985701294 |
| ecb_01957 | gmm  | 0.032357029  | 0.985701294 |
| ecb_01584 | uidC | -0.032488133 | 0.985862452 |
| ecb_02613 | ygcP | -0.023168213 | 0.986228043 |
| ecb_02350 | eutT | 0.02192636   | 0.98649297  |
| ecb_01384 | rimL | -0.028490371 | 0.987203778 |
| ecb_03867 | thiG | -0.026184505 | 0.98737921  |
| ecb_00937 | ssuB | -0.026664869 | 0.98759172  |
| ecb_02378 | hyfF | -0.021522352 | 0.98759172  |
| ecb_02382 | hyfJ | -0.03261534  | 0.98759172  |
| ecb_02365 | ypfH | -0.062706037 | 0.98759172  |
| ecb_00129 | yadE | -0.023472253 | 0.98759172  |
| ecb_02340 | eutC | 0.02351579   | 0.98759172  |
| ecb_04201 | yjiJ | -0.038321715 | 0.98759172  |
| ecb_03414 | yiaA | -0.043676296 | 0.987614228 |
| ecb_03895 | yjbD | -0.024088254 | 0.987614228 |
| ecb_00107 | ppdD | -0.021550313 | 0.987644929 |
| ecb_02495 | rpIS | -0.024367551 | 0.989111278 |
| ecb_02805 | yeeS | -0.04911785  | 0.989111278 |
| ecb_00169 | pyrH | -0.030648941 | 0.989111278 |
| ecb_01230 | ompW | 0.026938328  | 0.989221591 |
| ecb_00418 | priC | -0.0233448   | 0.989463126 |
| ecb_00678 | ybgQ | 0.022599292  | 0.989463126 |
| ecb_02015 | yegS | -0.019485324 | 0.989463126 |
| ecb_01626 | sodB | 0.024028642  | 0.989463126 |
| ecb_04102 | yjgA | -0.018896055 | 0.989463126 |
| ecb_00812 | ybjJ | -0.020321867 | 0.989463126 |

|            |      |              |             |
|------------|------|--------------|-------------|
| ecb_02406  | hisS | -0.017412422 | 0.989463126 |
| ecb_01967  | wzb  | 0.019854067  | 0.989463126 |
| ecb_00866  | artM | -0.016197364 | 0.989463126 |
| ecb_01499  | ydfH | -0.023662341 | 0.989463126 |
| ecb_04068  | priB | -0.017308903 | 0.989463126 |
| ecb_00813  | rcdA | -0.019334821 | 0.989463126 |
| ecb_03492  | mutM | 0.027197751  | 0.989463126 |
| ecb_00942  | elfA | -0.018036867 | 0.989463126 |
| ecb_02507  | ratA | 0.024384466  | 0.989463126 |
| ecb_00651  | kdpE | 0.016278268  | 0.989463126 |
| ecb_03171  | rplC | 0.014579223  | 0.989463126 |
| ecb_02344  | eutG | 0.036147376  | 0.989463126 |
| ecb_03045  | yhbY | 0.021935763  | 0.989463126 |
| ecb_02598  | ftsB | 0.020919067  | 0.989463126 |
| ecb_00111  | aroP | 0.032096041  | 0.989463126 |
| ecb_02496  | trmD | -0.017095745 | 0.989463126 |
| ecb_00074  | leuC | 0.020604097  | 0.989463126 |
| ecb_03705  | yigL | 0.030445285  | 0.989463126 |
| ecb_02789  | yggL | 0.02144186   | 0.989463126 |
| ecb_01759  | yeaM | -0.020662814 | 0.989463126 |
| ecb_01639  | ydhU | 0.020836531  | 0.989463126 |
| ecb_01195  | chaB | -0.029764234 | 0.989463126 |
| ecb_04063  | ulaD | -0.017199991 | 0.989463126 |
| ecb_00689  | mngR | -0.017904559 | 0.989463126 |
| ecb_03585  | dnaA | 0.024548388  | 0.989463126 |
| ecb_00081  | cra  | 0.024336837  | 0.989463126 |
| ecb_r00002 | rrlH | -0.01296963  | 0.989463126 |
| ecb_03898  | yjbE | -0.019955485 | 0.989463126 |
| ecb_00183  | accA | 0.031602366  | 0.989463126 |
| ecb_01643  | ydhY | 0.031117052  | 0.989463126 |
| ecb_03731  | tatC | 0.024091763  | 0.989463126 |
| ecb_03676  | aslA | -0.029216035 | 0.989463126 |
| ecb_00063  | araD | -0.028000441 | 0.989463126 |
| ecb_00532  | cusR | -0.050604795 | 0.989463126 |
| ecb_01797  | yobH | 0.036547543  | 0.989463126 |
| ecb_01306  | pgrR | -0.017864025 | 0.989463126 |
| ecb_03148  | rpsK | 0.013262834  | 0.989524609 |
| ecb_00981  | appC | 0.016339059  | 0.989746778 |
| ecb_02208  | nuoG | 0.042982613  | 0.990750322 |
| ecb_01245  | rluB | -0.029831331 | 0.991044801 |
| ecb_00310  | frmA | 0.020311607  | 0.991097505 |
| ecb_03624  | gidB | -0.023476879 | 0.991213555 |
| ecb_00995  | yccM | -0.02358357  | 0.991213555 |
| ecb_00288  | prpD | 0.015022337  | 0.991213555 |
| ecb_00763  | ybiH | 0.027601075  | 0.991213555 |
| ecb_00581  | citG | 0.023485495  | 0.991213555 |
| ecb_00947  | ycbV | -0.017916391 | 0.991213555 |
| ecb_04214  | hsdS | -0.021936893 | 0.991213555 |
| ecb_00700  | tolB | -0.020526373 | 0.991213555 |
| ecb_03859  | rplK | 0.015657646  | 0.991213555 |

|           |      |              |             |
|-----------|------|--------------|-------------|
| ecb_01841 | cmoA | 0.021330743  | 0.991213555 |
| ecb_01323 | ydaQ | -0.032755554 | 0.991213555 |
| ecb_03120 | yhdJ | -0.021668217 | 0.991213555 |
| ecb_00646 | ybfP | -0.021556661 | 0.991422184 |
| ecb_03387 | ldrD | 0.031410596  | 0.991534361 |
| ecb_03862 | rpIL | -0.014837441 | 0.991534361 |
| ecb_03778 | fdoH | 0.071330109  | 0.991583392 |
| ecb_00939 | ssuD | 0.017785183  | 0.991676858 |
| ecb_02540 | emrA | 0.020976274  | 0.991676858 |
| ecb_00498 | ninE | 0.025268244  | 0.991676858 |
| ecb_00374 | yajQ | -0.025779471 | 0.991676858 |
| ecb_02428 | hcaT | -0.018042493 | 0.991676858 |
| ecb_02236 | ubiX | 0.020797333  | 0.991676858 |
| ecb_03998 | yjdJ | -0.025112878 | 0.991676858 |
| ecb_03308 | panZ | -0.019270161 | 0.991676858 |
| ecb_02054 | yehT | -0.033089545 | 0.991676858 |
| ecb_00919 | lpxK | 0.017386009  | 0.991676858 |
| ecb_03366 | yhjA | 0.025167419  | 0.991676858 |
| ecb_01658 | ydiL | -0.021063941 | 0.991676858 |
| ecb_01165 | dadX | 0.02760494   | 0.991676858 |
| ecb_03013 | rsmI | -0.018896392 | 0.991676858 |
| ecb_02367 | ypfJ | -0.023809887 | 0.991676858 |
| ecb_01748 | gapA | 0.013443383  | 0.991676858 |
| ecb_00206 | yafS | 0.014367467  | 0.991676858 |
| ecb_04140 | insG | 0.01524994   | 0.991676858 |
| ecb_01376 | hokB | -0.02662734  | 0.991676858 |
| ecb_00988 | gfcC | -0.020713791 | 0.991676858 |
| ecb_03155 | rpIR | 0.012608885  | 0.991676858 |
| ecb_01182 | prs  | -0.026381001 | 0.991676858 |
| ecb_02032 | thiM | -0.028153674 | 0.991676858 |
| ecb_02212 | nuoB | 0.018716603  | 0.991676858 |
| ecb_00979 | hyaE | -0.01463904  | 0.991676858 |
| ecb_02925 | ygiM | 0.018185769  | 0.991676858 |
| ecb_01490 | marA | 0.021995802  | 0.991676858 |
| ecb_01363 | ynbA | 0.027005314  | 0.991676858 |
| ecb_01563 | mlc  | -0.025738764 | 0.991676858 |
| ecb_01567 | ydgD | -0.022327792 | 0.991676858 |
| ecb_02076 | preA | 0.015987235  | 0.991676858 |
| ecb_01026 | pgaA | 0.018520456  | 0.99204887  |
| ecb_01966 | wzc  | 0.028509627  | 0.99204887  |
| ecb_02445 | glnB | -0.028329644 | 0.99204887  |
| ecb_03385 | bcsF | 0.020437463  | 0.99204887  |
| ecb_00254 | ykgL | 0.021295729  | 0.99204887  |
| ecb_01751 | mipA | 0.031636019  | 0.992876785 |
| ecb_00653 | kdpC | 0.018342358  | 0.992876785 |
| ecb_00809 | mdfA | 0.013534161  | 0.992876785 |
| ecb_00279 | yahJ | -0.010623322 | 0.992876785 |
| ecb_03157 | rpsH | 0.009276427  | 0.992876785 |
| ecb_00128 | yadI | -0.020745172 | 0.992876785 |
| ecb_04077 | ytfA | 0.014978543  | 0.992876785 |



|           |      |              |             |
|-----------|------|--------------|-------------|
| ecb_00225 | mbhA | 0.015289343  | 0.992876785 |
| ecb_00976 | hyaB | -0.018809844 | 0.992876785 |
| ecb_01110 | mfd  | -0.02488973  | 0.992876785 |
| ecb_03647 | ilvM | 0.013518214  | 0.992876785 |
| ecb_03850 | trmA | 0.015305494  | 0.992876785 |
| ecb_00521 | ybcH | 0.016498642  | 0.992876785 |
| ecb_00191 | nlpE | 0.014433654  | 0.992876785 |
| ecb_02434 | hcaD | -0.012922915 | 0.992876785 |
| ecb_01267 | sapF | 0.016885633  | 0.992876785 |
| ecb_01024 | pgaC | -0.013918026 | 0.992876785 |
| ecb_01588 | hdhA | 0.016122948  | 0.992876785 |
| ecb_01146 | ymgD | 0.019009272  | 0.992876785 |
| ecb_01914 | sbcB | 0.018882711  | 0.992876785 |
| ecb_03507 | spoT | -0.023505925 | 0.992876785 |
| ecb_01330 | kilR | 0.030896792  | 0.992876785 |
| ecb_01859 | cheA | -0.012536578 | 0.992876785 |
| ecb_00575 | ahpF | -0.022065892 | 0.992876785 |
| ecb_04049 | yjfI | 0.022051048  | 0.992876785 |
| ecb_01045 | opgG | 0.017646371  | 0.992876785 |
| ecb_01401 | patD | -0.021908094 | 0.992876785 |
| ecb_00749 | moaB | -0.012818907 | 0.992876785 |
| ecb_00124 | hpt  | -0.01513827  | 0.992876785 |
| ecb_01284 | pspD | -0.018840499 | 0.992876785 |
| ecb_02206 | nuoI | 0.013853206  | 0.992876785 |
| ecb_00311 | frmR | 0.013535171  | 0.992876785 |
| ecb_00227 | yafN | 0.018173977  | 0.992876785 |
| ecb_00803 | bssR | 0.015950157  | 0.992876785 |
| ecb_02203 | nuoL | -0.015500091 | 0.992876785 |
| ecb_01727 | ynjF | 0.011965823  | 0.992876785 |
| ecb_01852 | cheZ | 0.016126186  | 0.992876785 |
| ecb_03741 | hemG | -0.017370202 | 0.992876785 |
| ecb_00170 | frr  | 0.011131898  | 0.992876785 |
| ecb_02198 | yfbM | 0.014388706  | 0.992876785 |
| ecb_02390 | upp  | -0.030803669 | 0.992876785 |
| ecb_03251 | yrfG | -0.014473867 | 0.992876785 |
| ecb_02484 | rluD | -0.013430688 | 0.992876785 |
| ecb_02478 | pka  | 0.017587798  | 0.992876785 |
| ecb_02640 | ygdH | 0.013959686  | 0.992876785 |
| ecb_01468 | yneL | 0.027346717  | 0.992876785 |
| ecb_00639 | ybfN | 0.013611746  | 0.992876785 |
| ecb_02348 | eutM | -0.016021502 | 0.992876785 |
| ecb_01702 | chbG | -0.010939211 | 0.992876785 |
| ecb_01437 | maeA | 0.022487983  | 0.992876785 |
| ecb_01410 | ansP | -0.01310706  | 0.992876785 |
| ecb_03575 | dgoD | -0.013606816 | 0.992876785 |
| ecb_02885 | dkgA | 0.018039955  | 0.992876785 |
| ecb_00185 | yaeR | 0.013387717  | 0.992876785 |
| ecb_03032 | rpsO | -0.016012023 | 0.992876785 |
| ecb_04010 | fxsA | 0.013225898  | 0.992876785 |
| ecb_00208 | dnaQ | 0.017521804  | 0.992876785 |

|           |      |              |             |
|-----------|------|--------------|-------------|
| ecb_02919 | glgS | -0.019426952 | 0.992876785 |
| ecb_03192 | rpsG | 0.011378918  | 0.992876785 |
| ecb_00914 | cmk  | -0.011978546 | 0.992876785 |
| ecb_02571 | hycE | 0.015733895  | 0.992876785 |
| ecb_02303 | yfeA | -0.023613865 | 0.992876785 |
| ecb_00755 | ybhN | -0.013155624 | 0.992876785 |
| ecb_03331 | rhsB | 0.022313556  | 0.992876785 |
| ecb_03167 | rpsS | 0.010973594  | 0.992876785 |
| ecb_01959 | gmd  | 0.022045829  | 0.992876785 |
| ecb_03188 | bfd  | -0.022194357 | 0.992876785 |
| ecb_01171 | ycgY | -0.027696395 | 0.992876785 |
| ecb_02053 | yehS | 0.014494106  | 0.992876785 |
| ecb_00758 | ybhQ | -0.030418639 | 0.992876785 |
| ecb_00614 | ybeU | 0.017907855  | 0.992876785 |
| ecb_03777 | fdol | 0.053584324  | 0.992876785 |
| ecb_01551 | ynfA | -0.016955669 | 0.992876785 |
| ecb_03193 | rpsL | 0.011115611  | 0.992876785 |
| ecb_02637 | yqcC | 0.015851378  | 0.992876785 |
| ecb_00321 | yaiT | -0.01552719  | 0.992876785 |
| ecb_04067 | rpsF | -0.011383615 | 0.992876785 |
| ecb_02383 | hyfR | -0.013884311 | 0.992876785 |
| ecb_02164 | yfaH | 0.021013002  | 0.992876785 |
| ecb_02207 | nuoH | -0.014682143 | 0.992876785 |
| ecb_00295 | cynX | 0.015890331  | 0.992876785 |
| ecb_00453 | ybbB | 0.013241206  | 0.992876785 |
| ecb_03357 | hdeB | 0.023355227  | 0.992876785 |
| ecb_00953 | uup  | 0.024269059  | 0.992876785 |
| ecb_02629 | relA | -0.027586518 | 0.992876785 |
| ecb_02346 | eutE | -0.021990381 | 0.992876785 |
| ecb_01831 | ruvB | 0.025060476  | 0.992876785 |
| ecb_01960 | wcaF | -0.01459692  | 0.992984885 |
| ecb_01263 | rnb  | 0.021992264  | 0.993133668 |
| ecb_00598 | ybeF | 0.018748048  | 0.993133668 |
| ecb_00186 | tilS | 0.014118586  | 0.993339344 |
| ecb_02654 | fuck | -0.033843961 | 0.993356112 |
| ecb_01281 | pspA | -0.018595625 | 0.993356112 |
| ecb_02375 | hyfC | -0.013019897 | 0.993356112 |
| ecb_03294 | yrhA | -0.027041308 | 0.993356112 |
| ecb_02353 | eutS | 0.016101404  | 0.993356112 |
| ecb_03996 | dcuS | 0.011594146  | 0.993356112 |
| ecb_01539 | dicA | -0.01497428  | 0.993356112 |
| ecb_00312 | yaiO | 0.010788294  | 0.993356112 |
| ecb_00326 | yaiY | 0.010564408  | 0.993356112 |
| ecb_03115 | yhdT | 0.011130265  | 0.993356112 |
| ecb_01495 | ydeI | 0.017735178  | 0.993356112 |
| ecb_03401 | bisC | 0.007891167  | 0.993356112 |
| ecb_03399 | tag  | 0.009149139  | 0.993356112 |
| ecb_03554 | ilvN | -0.015955411 | 0.993356112 |
| ecb_01755 | yeaJ | -0.012510673 | 0.993356112 |
| ecb_01581 | fumA | -0.011831897 | 0.993356112 |

|           |      |              |             |
|-----------|------|--------------|-------------|
| ecb_02874 | yghW | 0.019030689  | 0.993356112 |
| ecb_03238 | rpe  | 0.00721838   | 0.993356112 |
| ecb_00175 | bamA | 0.010209764  | 0.993356112 |
| ecb_02539 | mprA | 0.008969957  | 0.993356112 |
| ecb_00245 | paoA | 0.013366013  | 0.993356112 |
| ecb_00073 | leuD | 0.014271492  | 0.993356112 |
| ecb_02995 | yhaV | -0.016349797 | 0.993356112 |
| ecb_00282 | yahM | -0.009607556 | 0.993356112 |
| ecb_03111 | csrD | 0.010393187  | 0.993356112 |
| ecb_02660 | ygdI | 0.011378762  | 0.993356112 |
| ecb_02204 | nuoK | -0.010256193 | 0.993356112 |
| ecb_02373 | hyfA | 0.014033755  | 0.993356112 |
| ecb_00108 | nadC | -0.009420875 | 0.993356112 |
| ecb_02155 | yfaT | -0.015271825 | 0.993356112 |
| ecb_00366 | pgpA | -0.01351889  | 0.993356112 |
| ecb_00997 | torT | 0.009432061  | 0.993356112 |
| ecb_00078 | leuO | 0.012322598  | 0.993356112 |
| ecb_02986 | tdcR | -0.01843699  | 0.993356112 |
| ecb_01130 | hflD | -0.016167975 | 0.993356112 |
| ecb_01838 | yecD | 0.010247985  | 0.993356112 |
| ecb_00452 | yIbG | 0.008050882  | 0.993356112 |
| ecb_04241 | yjJP | -0.014966248 | 0.993356112 |
| ecb_00965 | yccF | 0.008089206  | 0.993356112 |
| ecb_01740 | ydjG | 0.008258397  | 0.993356112 |
| ecb_02355 | talA | -0.011427777 | 0.993356112 |
| ecb_00189 | yaeQ | -0.014928044 | 0.993356112 |
| ecb_00099 | secA | -0.010968246 | 0.993356112 |
| ecb_01448 | yddV | 0.017627015  | 0.993356112 |
| ecb_02655 | fucU | -0.029410132 | 0.993356112 |
| ecb_00804 | yIil | -0.010918533 | 0.993356112 |
| ecb_01532 | hokD | -0.040089212 | 0.993356112 |
| ecb_02338 | eutK | -0.01108213  | 0.993356112 |
| ecb_03089 | sspA | 0.010065145  | 0.993356112 |
| ecb_04235 | yjJN | 0.013648577  | 0.993356112 |
| ecb_03478 | waaC | 0.014281695  | 0.993356112 |
| ecb_00702 | ybgF | -0.007888263 | 0.993356112 |
| ecb_00999 | torC | 0.008946202  | 0.993356112 |
| ecb_01283 | pspC | -0.013972967 | 0.993356112 |
| ecb_03169 | rplW | 0.007469696  | 0.993356112 |
| ecb_01232 | yciF | 0.018914303  | 0.993356112 |
| ecb_00115 | lpd  | 0.007114559  | 0.993356112 |
| ecb_02342 | eutA | -0.011409693 | 0.993356112 |
| ecb_03973 | phnG | -0.019688015 | 0.993356112 |
| ecb_03450 | yibJ | 0.01128893   | 0.993356112 |
| ecb_03091 | rplM | 0.008689924  | 0.993356112 |
| ecb_01035 | csfG | -0.017367313 | 0.993356112 |
| ecb_00171 | dxr  | 0.009073538  | 0.993356112 |
| ecb_02055 | yehU | -0.015530678 | 0.993356112 |
| ecb_01681 | ihfA | 0.007930781  | 0.993356112 |
| ecb_00248 | ecpE | -0.00841514  | 0.993356112 |

|           |      |              |             |
|-----------|------|--------------|-------------|
| ecb_01432 | fdnG | 0.014032811  | 0.993356112 |
| ecb_04136 | intB | 0.008275003  | 0.993356112 |
| ecb_03121 | yhdU | -0.020399988 | 0.993356112 |
| ecb_02214 | lrhA | -0.01101991  | 0.993356112 |
| ecb_03073 | mtgA | -0.01658079  | 0.993356112 |
| ecb_02050 | yehP | 0.01637116   | 0.993356112 |
| ecb_03439 | viaT | 0.010096514  | 0.993356112 |
| ecb_04122 | yjgM | 0.013917275  | 0.993356112 |
| ecb_01295 | ycjV | -0.014146597 | 0.993356112 |
| ecb_03250 | yrfF | -0.010636787 | 0.993356112 |
| ecb_02706 | hyuA | -0.01757     | 0.993356112 |
| ecb_02397 | yfgH | 0.00941717   | 0.993356112 |
| ecb_03682 | cyaY | 0.014812641  | 0.993356112 |
| ecb_02184 | arnE | -0.018374469 | 0.993356112 |
| ecb_02171 | yfaU | -0.008309792 | 0.993356112 |
| ecb_02419 | hscB | -0.016823841 | 0.993356112 |
| ecb_03477 | waaF | 0.015695229  | 0.993356112 |
| ecb_02415 | pepB | 0.014383902  | 0.993356112 |
| ecb_04044 | purA | 0.013049945  | 0.993356112 |
| ecb_01450 | gadC | -0.01612054  | 0.993365418 |
| ecb_03785 | frvA | 0.013229388  | 0.993365418 |
| ecb_01724 | ynjC | -0.013068312 | 0.993376836 |
| ecb_02731 | yqfA | 0.011701091  | 0.993429334 |
| ecb_01430 | yddL | -0.016002111 | 0.993429334 |
| ecb_00244 | paoB | 0.010834291  | 0.993429334 |
| ecb_00871 | ybjQ | 0.01027022   | 0.993569214 |
| ecb_01720 | ydjY | -0.009936765 | 0.99363837  |
| ecb_00984 | etk  | -0.008582196 | 0.99363837  |
| ecb_02932 | ttdB | 0.011929371  | 0.99363837  |
| ecb_00943 | elfD | 0.010605293  | 0.99363837  |
| ecb_03026 | yhbV | 0.009885158  | 0.99363837  |
| ecb_04084 | ytfH | -0.008681637 | 0.99363837  |
| ecb_03808 | uspD | -0.012053516 | 0.99371462  |
| ecb_00877 | hcr  | 0.008199518  | 0.99371462  |
| ecb_01729 | ynjH | -0.007148472 | 0.99390035  |
| ecb_03870 | thiE | -0.010378182 | 0.99390035  |
| ecb_01439 | bdm  | -0.018585319 | 0.99390035  |
| ecb_03253 | hslO | 0.009194064  | 0.99390035  |
| ecb_00168 | tsf  | 0.006983083  | 0.99390035  |
| ecb_03023 | yhbS | -0.007367526 | 0.99390035  |
| ecb_02312 | zipA | 0.015176051  | 0.994612197 |
| ecb_03901 | yjbH | 0.007709983  | 0.994612197 |
| ecb_01791 | mntP | 0.008067926  | 0.994612197 |
| ecb_03315 | yhhL | -0.006837903 | 0.994697732 |
| ecb_02352 | eutP | -0.006370523 | 0.994697732 |
| ecb_00966 | helD | 0.006004019  | 0.994697732 |
| ecb_00661 | ybfC | -0.014285411 | 0.995177588 |
| ecb_00920 | ycaQ | 0.009759082  | 0.995233321 |
| ecb_00751 | moaD | -0.008816859 | 0.995233321 |
| ecb_02083 | yeiG | 0.007385528  | 0.995233321 |

|           |      |              |             |
|-----------|------|--------------|-------------|
| ecb_03068 | hpf  | 0.006721139  | 0.995233321 |
| ecb_00855 | ybjC | -0.009005826 | 0.995392893 |
| ecb_03579 | yidX | -0.007387213 | 0.995392893 |
| ecb_03166 | rplV | -0.00496431  | 0.995656216 |
| ecb_02899 | ygiZ | -0.01151779  | 0.99578667  |
| ecb_02430 | hcaE | -0.005600428 | 0.996431376 |
| ecb_00806 | dacC | 0.010098211  | 0.996431376 |
| ecb_00573 | dsbG | -0.005085701 | 0.996431376 |
| ecb_03860 | rplA | -0.005709911 | 0.996431376 |
| ecb_03233 | yhfX | 0.008998042  | 0.996431376 |
| ecb_01187 | prmC | -0.005349368 | 0.996438862 |
| ecb_02678 | rppH | 0.004214554  | 0.996438862 |
| ecb_02656 | fucR | 0.007582389  | 0.996438862 |
| ecb_00309 | frmB | -0.004342927 | 0.996438862 |
| ecb_01657 | ydiK | -0.007297189 | 0.996438862 |
| ecb_01583 | ydgA | 0.004648075  | 0.996438862 |
| ecb_01129 | purB | 0.010137366  | 0.996438862 |
| ecb_02066 | yohD | -0.007212483 | 0.996438862 |
| ecb_01695 | yniB | 0.008323905  | 0.996438862 |
| ecb_01046 | opgH | -0.007867694 | 0.996438862 |
| ecb_00066 | araC | 0.008771185  | 0.996438862 |
| ecb_01585 | uidB | -0.006028269 | 0.996438862 |
| ecb_02363 | dapE | 0.005892078  | 0.996438862 |
| ecb_01719 | ydjX | -0.010357666 | 0.996438862 |
| ecb_03024 | yhbT | 0.004589173  | 0.996438862 |
| ecb_01701 | katE | 0.00858747   | 0.996438862 |
| ecb_03607 | bgjG | 0.007721179  | 0.996438862 |
| ecb_03067 | rpoN | 0.005207834  | 0.996438862 |
| ecb_02306 | gltX | 0.009822489  | 0.996438862 |
| ecb_03648 | ilvE | -0.00430397  | 0.996438862 |
| ecb_02526 | alaE | -0.006901576 | 0.996438862 |
| ecb_01705 | chbA | 0.005889148  | 0.996438862 |
| ecb_04042 | hflC | 0.006011105  | 0.996438862 |
| ecb_01806 | rsmF | -0.007060344 | 0.996438862 |
| ecb_00590 | dpiA | 0.005326577  | 0.996438862 |
| ecb_00176 | skp  | 0.004551597  | 0.996438862 |
| ecb_01331 | sieB | 0.009546697  | 0.996438862 |
| ecb_01985 | yegP | 0.006720429  | 0.996438862 |
| ecb_02422 | iscS | -0.004953437 | 0.996438862 |
| ecb_04115 | yjgH | 0.008415645  | 0.996438862 |
| ecb_00464 | glxK | -0.006387842 | 0.996438862 |
| ecb_03090 | rpsl | -0.004469932 | 0.996933652 |
| ecb_01687 | infC | -0.00408151  | 0.996933652 |
| ecb_03586 | rpmH | 0.003770624  | 0.996933652 |
| ecb_03495 | yicR | -0.005749534 | 0.996933652 |
| ecb_03151 | secY | 0.003125608  | 0.996933652 |
| ecb_02285 | yfdX | 0.006259875  | 0.996933652 |
| ecb_02698 | ygeR | -0.004592763 | 0.996933652 |
| ecb_02293 | fryA | -0.004171533 | 0.996933652 |
| ecb_01561 | clcB | -0.005461995 | 0.996933652 |

|            |      |              |             |
|------------|------|--------------|-------------|
| ecb_03240  | damX | 0.002737672  | 0.996933652 |
| ecb_02718  | ygfS | 0.006431849  | 0.996933652 |
| ecb_00600  | ybeD | 0.00445552   | 0.996933652 |
| ecb_00502  | ybcQ | 0.004221297  | 0.996933652 |
| ecb_03056  | mIaB | -0.003193055 | 0.996933652 |
| ecb_01188  | yChQ | -0.004200081 | 0.996933652 |
| ecb_00916  | ihfB | -0.00246292  | 0.996933652 |
| ecb_02614  | ygcQ | -0.005681166 | 0.996933652 |
| ecb_03405  | YiaG | -0.004324419 | 0.996933652 |
| ecb_r00003 | rrfH | 0.003894277  | 0.996933652 |
| ecb_02345  | eutJ | -0.005837729 | 0.996933652 |
| ecb_00872  | amiD | -0.004150215 | 0.996933652 |
| ecb_00672  | ybgK | -0.005155388 | 0.996933652 |
| ecb_02223  | yfcC | 0.005124016  | 0.996933652 |
| ecb_04069  | rpsR | 0.003198152  | 0.996933652 |
| ecb_03993  | fumB | 0.007302692  | 0.996933652 |
| ecb_01664  | ydiO | -0.004138717 | 0.996933652 |
| ecb_02892  | ygiS | 0.00584399   | 0.996933652 |
| ecb_03921  | dusA | -0.004533276 | 0.996933652 |
| ecb_03935  | soxR | 0.003885389  | 0.996933652 |
| ecb_00904  | ycaN | -0.003316383 | 0.996933652 |
| ecb_01266  | ycjD | -0.002939229 | 0.996933652 |
| ecb_03580  | yidA | 0.004098503  | 0.996933652 |
| ecb_03398  | yhjY | -0.004982952 | 0.996933652 |
| ecb_02676  | lgt  | 0.006622153  | 0.996933652 |
| ecb_03920  | yjbM | -0.008605296 | 0.996933652 |
| ecb_01798  | kdgR | 0.00698358   | 0.996933652 |
| ecb_03660  | rhoL | -0.002503236 | 0.997098112 |
| ecb_02653  | fucI | -0.007908556 | 0.99722593  |
| ecb_03662  | rfe  | 0.002812885  | 0.99722593  |
| ecb_03497  | dut  | -0.002479899 | 0.99722593  |
| ecb_00230  | ykfJ | 0.003856371  | 0.99722593  |
| ecb_03146  | rpoA | -0.001566505 | 0.99722593  |
| ecb_03359  | hdeD | 0.002962679  | 0.99722593  |
| ecb_03153  | rpmD | 0.001963268  | 0.99722593  |
| ecb_03147  | rpsD | -0.001648983 | 0.99722593  |
| ecb_01758  | yeaL | 0.002984004  | 0.99722593  |
| ecb_03088  | sspB | 0.002182635  | 0.99722593  |
| ecb_01861  | motA | 0.002897929  | 0.99722593  |
| ecb_00427  | aes  | -0.002240402 | 0.99722593  |
| ecb_02359  | aegA | 0.002935192  | 0.99722593  |
| ecb_00892  | trxB | 0.002587602  | 0.99722593  |
| ecb_01095  | hoIb | 0.002138843  | 0.99722593  |
| ecb_03293  | yhhZ | 0.002723679  | 0.99722593  |
| ecb_02094  | psuG | -0.002945624 | 0.99722593  |
| ecb_02395  | yfgF | -0.002554961 | 0.99722593  |
| ecb_00177  | lpxD | -0.002044593 | 0.997274427 |
| ecb_02246  | flk  | 0.002061583  | 0.997274427 |
| ecb_01509  | lomR | -0.002281357 | 0.997454095 |
| ecb_00915  | rpsA | 0.001795035  | 0.997454095 |

|           |      |              |             |
|-----------|------|--------------|-------------|
| ecb_03353 | yhiS | 0.003828561  | 0.997733829 |
| ecb_02347 | eutN | -0.001792025 | 0.997733829 |
| ecb_03053 | sfsB | -0.002272951 | 0.997820316 |
| ecb_02210 | nuoE | -0.001637526 | 0.997820316 |
| ecb_00343 | mak  | 0.001510175  | 0.997820316 |
| ecb_03161 | rplN | -0.001175253 | 0.997842722 |
| ecb_01040 | csgC | 0.001679836  | 0.99792226  |
| ecb_02439 | yphE | 0.001416958  | 0.99792226  |
| ecb_03562 | yidJ | 0.001314972  | 0.99792226  |
| ecb_03605 | bglB | -0.001942956 | 0.99792226  |
| ecb_03154 | rpsE | 0.00097543   | 0.997928995 |
| ecb_03625 | mnmG | 0.00144371   | 0.997928995 |
| ecb_01811 | yebZ | 0.00132068   | 0.997928995 |
| ecb_02694 | yqeH | 0.002014838  | 0.997928995 |
| ecb_00989 | gfcB | 0.001621319  | 0.997990551 |
| ecb_02951 | higA | -0.001141543 | 0.997990551 |
| ecb_03400 | yiaC | 0.001768325  | 0.997990551 |
| ecb_03198 | fkpA | 0.001056449  | 0.997990551 |
| ecb_02976 | yhaL | 0.001725101  | 0.997998843 |
| ecb_01665 | ydiP | 0.001289008  | 0.997998843 |
| ecb_02506 | ratB | -0.001623997 | 0.997998843 |
| ecb_00494 | ybcK | -0.001352526 | 0.997998843 |
| ecb_00547 | hokE | 0.001544569  | 0.99815943  |
| ecb_03321 | dcrB | -0.000810391 | 0.998276534 |
| ecb_04220 | yjiY | 0.001577872  | 0.998762805 |
| ecb_03469 | yibN | 0.000289998  | 0.999307974 |
| ecb_02865 | yghU | -0.000250754 | 0.999618404 |
| ecb_01296 | ompG | 0.000292739  | 0.999618404 |
| ecb_00879 | ybjE | 0.000260041  | 0.999618404 |
| ecb_01846 | yecM | -0.000327125 | 0.999618404 |
| ecb_01645 | pykF | 3.78E-05     | 0.999908084 |
| ecb_03156 | rplF | -0.000101057 | 0.999908084 |
| ecb_01887 | yedZ | 8.21E-05     | 0.999908084 |
| ecb_01086 | plsX | -4.67E-05    | 0.999908084 |
| ecb_00306 | mhpE | -9.02E-06    | 0.999908084 |
| ecb_03005 | agaB | 1.95E-05     | 0.999908084 |
| ecb_03239 | dam  | 0.000239716  | 0.999908084 |
| ecb_03332 | yhhH | -0.000102397 | 0.999908084 |
| ecb_01329 | ydaE | 0.000287847  | 0.999908084 |
